# Supplementary material for: Variation in preoperative stress testing by patient, physician and surgical type: a cohort study
Source: PubMed Central journal article supplement — BMJ Open. 2021 Sep 27;11(9):e048052. doi: 10.1136/bmjopen-2020-048052 (PMC8477322; doi:10.1136/bmjopen-2020-048052), 2021-09-27
Supplement: bmjopen-2020-048052.draft_revisions.pdf [file bmjopen-2020-048052.draft_revisions.pdf]

# BMJ Open

BMJ Open is committed to open peer review. As part of this commitment we make the peer review history of every article we publish publicly available.

When an article is published we post the peer reviewers' comments and the authors' responses online. We also post the versions of the paper that were used during peer review. These are the versions that the peer review comments apply to.

The versions of the paper that follow are the versions that were submitted during the peer review process. They are not the versions of record or the final published versions. They should not be cited or distributed as the published version of this manuscript.

BMJ Open is an open access journal and the full, final, typeset and author-corrected version of record of the manuscript is available on our site with no access controls, subscription charges or pay-per-view fees (<http://bmjopen.bmj.com>).

If you have any questions on BMJ Open's open peer review process please email [info.bmjopen@bmj.com](mailto:info.bmjopen@bmj.com)

# BMJ Open

## Variation in preoperative stress testing by patient, physician, and surgical type – a cohort study

|                               |                                                                                                                                                                                                                                                                                                                                                                                                                                              |
|-------------------------------|----------------------------------------------------------------------------------------------------------------------------------------------------------------------------------------------------------------------------------------------------------------------------------------------------------------------------------------------------------------------------------------------------------------------------------------------|
| Journal:                      | <i>BMJ Open</i>                                                                                                                                                                                                                                                                                                                                                                                                                              |
| Manuscript ID                 | bmjopen-2020-048052                                                                                                                                                                                                                                                                                                                                                                                                                          |
| Article Type:                 | Original research                                                                                                                                                                                                                                                                                                                                                                                                                            |
| Date Submitted by the Author: | 17-Dec-2020                                                                                                                                                                                                                                                                                                                                                                                                                                  |
| Complete List of Authors:     | Pappas, Matthew; Cleveland Clinic, Department of Hospital Medicine<br>Blackstone, Eugene; Cleveland Clinic, Miller Family Heart and Vascular Institute<br>Sessler, Daniel; Cleveland Clinic, Outcomes Research<br>Auerbach, A; University of California, San Francisco<br>Kattan, Michael; Cleveland Clinic<br>Milinovich, Alex; Cleveland Clinic<br>Rothberg, Michael B.; Cleveland Clinic, Cleveland, USA, Department of Internal Medicine |
| Keywords:                     | INTERNAL MEDICINE, Adult surgery < SURGERY, Adult anaesthesia < ANAESTHETICS, Adult cardiology < CARDIOLOGY, HEALTH SERVICES ADMINISTRATION & MANAGEMENT                                                                                                                                                                                                                                                                                     |
|                               |                                                                                                                                                                                                                                                                                                                                                                                                                                              |

SCHOLARONE™  
Manuscripts

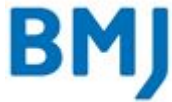

I, the Submitting Author has the right to grant and does grant on behalf of all authors of the Work (as defined in the below author licence), an exclusive licence and/or a non-exclusive licence for contributions from authors who are: i) UK Crown employees; ii) where BMJ has agreed a CC-BY licence shall apply, and/or iii) in accordance with the terms applicable for US Federal Government officers or employees acting as part of their official duties; on a worldwide, perpetual, irrevocable, royalty-free basis to BMJ Publishing Group Ltd ("BMJ") its licensees and where the relevant Journal is co-owned by BMJ to the co-owners of the Journal, to publish the Work in this journal and any other BMJ products and to exploit all rights, as set out in our [licence](#).

The Submitting Author accepts and understands that any supply made under these terms is made by BMJ to the Submitting Author unless you are acting as an employee on behalf of your employer or a postgraduate student of an affiliated institution which is paying any applicable article publishing charge ("APC") for Open Access articles. Where the Submitting Author wishes to make the Work available on an Open Access basis (and intends to pay the relevant APC), the terms of reuse of such Open Access shall be governed by a Creative Commons licence – details of these licences and which [Creative Commons](#) licence will apply to this Work are set out in our licence referred to above.

Other than as permitted in any relevant BMJ Author's Self Archiving Policies, I confirm this Work has not been accepted for publication elsewhere, is not being considered for publication elsewhere and does not duplicate material already published. I confirm all authors consent to publication of this Work and authorise the granting of this licence.

## Variation in preoperative stress testing by patient, physician, and surgical type – a cohort study

Matthew A Pappas, MD, MPH,<sup>1,2,3</sup> Daniel I Sessler, MD,<sup>3,4</sup> Andrew D Auerbach, MD, MPH,<sup>5</sup> Michael W Kattan, PhD,<sup>6</sup> Alex Milinovich, BA,<sup>6</sup> Eugene H Blackstone, MD,<sup>7</sup> and Michael B Rothberg, MD, MPH<sup>1</sup>

- 1: Center for Value-based Care Research, Cleveland Clinic, Cleveland, OH
- 2: Department of Hospital Medicine, Cleveland Clinic, Cleveland, OH
- 3: Outcomes Research Consortium, Cleveland, OH
- 4: Department of Outcomes Research, Anesthesiology Institute, Cleveland Clinic, Cleveland, OH
- 5: Department of Hospital Medicine, University of California, San Francisco, San Francisco, CA
- 6: Department of Quantitative Health Sciences, Lerner Research Institute, Cleveland Clinic, Cleveland, OH
- 7: Miller Family Heart and Vascular Institute, Cleveland Clinic, Cleveland, OH

Correspondence to Matthew A Pappas: pappasm@ccf.org; 216.444.9565; 9500 Euclid Ave., Mail Stop G-10, Cleveland, OH 44195

Short title/running head: Variation in preoperative stress testing

Word count: 3,013

Abstract word count: 264

Number of references: 37

Number of tables: 3

Number of figures: 2

Number of appendices: 1

Financial support: This work was supported by the National Heart, Lung, and Blood Institute (NHLBI 1Ko8HL141598).

Competing Interests: None

Keywords (MEDLINE): Perioperative care  
Preoperative care  
Risk assessment  
Elective surgical procedures  
Cohort studies  
Exercise test  
Tomography, Emission-Computed, Single-Photon  
Echocardiography, Stress

**Abstract****Objectives:**

To describe variation in and drivers of contemporary preoperative cardiac stress testing

**Setting:**

A dedicated preoperative risk assessment and optimization clinic at a large integrated medical center from 2008 through 2018

**Participants:**

A cohort of 118,552 adult patients seen by 104 physicians across 159,795 visits to a preoperative risk assessment and optimization clinic

**Main Outcome:**

Referral for preoperative stress testing, including nuclear, echocardiographic, or electrocardiographic-only stress testing, following the clinic visit, within 30 days, and before major surgery

**Results:**

A total of 8,303 visits (5.2%) resulted in referral for preoperative stress testing. Key patient factors associated with preoperative stress testing included predicted surgical risk, patient functional status, a previous diagnosis of ischemic heart disease, tobacco use, and body mass index. Patients living in either the most- or least-deprived census block groups were more likely to be tested. Patients were tested more frequently before aortic, peripheral vascular, or urologic interventions than before other surgical subcategories. Even after fully adjusting for patient and surgical factors, provider effects remained important:

2

1  
2  
3 marginal testing rates differed by 3-fold in relative terms and around 2.5% in absolute  
4  
5 terms between the 5<sup>th</sup> and 95<sup>th</sup> percentile physicians. Rates of stress testing appear to be  
6  
7 decreasing over time.  
8  
9

### 10 **Conclusions:**

11  
12 In this large cohort of patients seen for preoperative risk assessment at a single health  
13  
14 system, decisions to refer patients for preoperative stress testing are influenced by a  
15  
16 number of factors other than estimated perioperative risk and functional status, the key  
17  
18 considerations in current guidelines. Use of preoperative stress testing appears to have  
19  
20 decreased over time and remains highly dependent on the provider.  
21  
22  
23  
24  
25  
26  
27  
28  
29  
30  
31  
32  
33  
34  
35  
36  
37  
38  
39  
40  
41  
42  
43  
44  
45  
46  
47  
48  
49  
50  
51  
52  
53  
54

**Strengths and limitations of this study:**

- We identified a large cohort of patients considering noncardiac surgery, with detailed clinical data from each visit.
- We tested predictor variables across multiple different constructs that could be related to preoperative stress testing.
- We accounted for clustering by physician and patient, testing different structures to ensure that variance was partitioned as accurately as possible.
- Although missing data is inherent to all studies using data from electronic medical records, we used multiple imputation by chained equations to mitigate the biases that missing data could introduce.

**Glossary of Abbreviations:**

ACC/AHA: American College of Cardiology/American Heart Association

ASA: American Society of Anesthesiologists

CAD: coronary artery disease

METs: Estimated metabolic equivalents

MICA: Myocardial infarction or cardiac arrest calculator

RCRI: Revised cardiac risk index

## Introduction

The 2014 American College of Cardiology/American Heart Association (ACC/AHA) guidelines recommend preoperative stress testing for patients whose predicted risk of a major adverse cardiac event exceeds 1% and whose functional status is poor or unknown, when results from stress testing would change clinical management.<sup>1</sup>

However, clinicians use different risk prediction tools, which identify different patients as having elevated risk.<sup>2,3</sup> In addition, multiple methods of assessing functional status are in use, which again can lead to variations in patient populations chosen for stress testing.<sup>2,4-7</sup> Thus, the final decision to proceed with stress testing can become something closer to a provider-level judgment than a guideline-driven protocol.<sup>8</sup> Variation in use of stress testing can have substantial cost implications and potentially prompt subsequent tests and procedures with little clinical benefit.<sup>9</sup>

To understand contemporary use and drivers of preoperative cardiac stress testing, we sought to describe variation and predictors of preoperative stress testing using rich clinical data from a large integrated health system.

## Methods

The Internal Medicine Preoperative Assessment, Consultation and Treatment (IMPACT) Center assesses patients prior to noncardiac surgery at the Cleveland Clinic. In the years



1  
2  
3 from 2008 through 2018, we captured 118,552 patients seen in this clinic by 104 physicians  
4  
5 across 159,795 visits. Among this cohort, we identified scheduled and completed  
6  
7 preoperative cardiac stress tests, here defined as those within the 30 days following the  
8  
9 clinic visit and before noncardiac surgery. This study was approved by the Cleveland  
10  
11 Clinic Institutional Review Board. All analyses were performed in Stata (version 14;  
12  
13 College Station, TX).  
14  
15  
16  
17  
18  
19

### 20 *Predictor variables*

21  
22 We theorized that six underlying constructs would be related to stress test ordering:  
23  
24 predicted perioperative risk, functional status, social and financial support, medical  
25  
26 comorbidities, physician tendencies and experience, and time. We created a random  
27  
28 effects logit model for each construct to refine variables included in our final model.  
29  
30 Within each submodel, we pruned variables according to Bayesian information criteria  
31  
32 (BIC). For continuous variables, we assessed for nonlinear or categorical relationships  
33  
34 using visual examination of binned scatter plots. To avoid overfitting, we limited our  
35  
36 number of candidate predictors to fewer than 1 predictor variable per 15 preoperative  
37  
38 stress tests, including tested interactions, nonlinear effects, and discarded predictors. We  
39  
40 estimated that we had approximately 539 degrees of freedom for analysis, with fewer for  
41  
42 cluster-level variables depending on model structure (described below).  
43  
44  
45  
46  
47  
48  
49  
50  
51

52 For measures of perioperative risk, we tested Revised Cardiac Risk Index (RCRI),  
53  
54

55 6  
56  
57  
58  
59  
60

1  
2  
3 Myocardial Infarction or Cardiac Arrest (MICA), and MICA's categorization of surgeries  
4 using a previously-published crosswalk.<sup>2,10,11</sup> (Although different procedures likely have  
5 different intrinsic cardiac risk, we used the MICA categorization of surgeries to avoid  
6 overfitting.<sup>11,12</sup>) Upon finding that few surgical categories were associated with different  
7 stress testing rates, we replaced that multinomial variable with indicator variables for  
8 each category associated with different testing rates in our data (aortic, peripheral  
9 vascular, and urologic surgeries). We tested both documented and calculated RCRI,  
10 which may differ for a variety of reasons including lab results between the clinic visit and  
11 documentation, erroneous diagnoses/chart lore, outside records unavailable in the  
12 electronic medical record, and misconceptions about how RCRI is calculated. We treated  
13 both estimates of RCRI as continuous to force a monotonic relationship (no theory would  
14 support lower testing rates at higher predicted cardiac risk). We tested MICA-predicted  
15 probability both as a continuous variable and dichotomized at 1%. Although we used the  
16 American Society of Anesthesiologists (ASA) class to calculate MICA, we did not test that  
17 separately, as it is usually documented only after the patient's visit to this clinic during  
18 subsequent anesthesiologist evaluation.  
19  
20  
21  
22  
23  
24  
25  
26  
27  
28  
29  
30  
31  
32  
33  
34  
35  
36  
37  
38  
39  
40  
41  
42  
43  
44

45 For measures of functional status, we tested estimated metabolic equivalents (METs),  
46 which in this clinic is based on a semi-quantitative questionnaire, and the physician's  
47 subjective global assessment of function, which is comparable to the Eastern Cooperative  
48 Oncology Group (ECOG) score.<sup>13</sup> For measures of social and financial support, we tested  
49  
50  
51  
52  
53  
54

55  
56  
57  
58  
59  
60  
7

1  
2  
3 area deprivation index (a measure of socioeconomic disadvantage based on education,  
4 employment, housing quality, and poverty measures by census block group), race,  
5 ethnicity, marital status, and age (here dichotomized at age 65 to reflect changes in access  
6 to care with universal Medicare eligibility).<sup>14</sup> For measures of medical comorbidities and  
7 illness, we considered age, vital signs at the clinic visit, diagnoses of coronary artery  
8 disease, cerebrovascular disease, or congestive heart failure, diabetes, use of insulin,  
9 creatinine, tobacco use, and predicted probability of obstructive coronary artery disease.<sup>15</sup>  
10 For measures of physician tendencies and experience, we tested (on the date of each visit)  
11 years of post-residency practice (a proxy for overall experience) and the number of  
12 previous encounters the physician had completed in our dataset (a proxy for experience  
13 in preoperative risk assessment more specifically). For measures of time, we theorized  
14 that patients who had previous cardiac stress tests would be less likely to be referred for  
15 preoperative stress testing, and that physicians would give greater weight to more recent  
16 tests (i.e., the relationship would be time-dependent). We used the date of the visit as a  
17 continuous variable to test for changing stress test rates over time. To assess for changes  
18 related to publication of the current ACC/AHA guideline, we created a dichotomous  
19 variable for whether the visit occurred before or after said guideline's December 9, 2014  
20 publication, and tested for interactions between that term and other predictors.<sup>1</sup>  
21  
22  
23  
24  
25  
26  
27  
28  
29  
30  
31  
32  
33  
34  
35  
36  
37  
38  
39  
40  
41  
42  
43  
44  
45  
46  
47  
48

### 49 *Model structure*

50  
51 Conceptually, visits could be thought of as clustered by patient (with physician-level  
52  
53  
54

55 8  
56  
57  
58  
59  
60

1  
2  
3 variables at the level of the visit) or by physician (with patient-level variables at the level  
4 of the visit). We tested different structures using empty models and calculated intraclass  
5 correlation coefficients to estimate what proportion of variance was explained by  
6 unmeasured patient-level or physician-level factors. With visits clustered by physician,  
7 approximately 0.4% of variance in stress test ordering was at the level of the physician.  
8  
9  
10 When we clustered visits by patient, approximately 4.9% of variance in stress test  
11 ordering was at the level of the patient. We therefore developed our model using  
12 physician- and visit-level variables clustered by patient, including physician ID as a visit-  
13 level indicator (“dummy”) variable. This approach drops some low volume providers for  
14 whom outcomes are overfitted but should capture more unmeasured variance at both the  
15 patient and provider levels.  
16  
17  
18  
19  
20  
21  
22  
23  
24  
25  
26  
27  
28  
29  
30  
31

### 32 *Multivariable modeling*

33  
34 Finally, we added the remaining predictor variables from each submodel into a  
35 multivariable logistic regression model. We again pruned predictors based on BIC and  
36 examined for nonlinear or categorical relationships. We revisited our model structure  
37 using the final predictor variables, comparing models clustered by patient or physician  
38 based on BIC.  
39  
40  
41  
42  
43  
44  
45  
46  
47  
48  
49

50 Because results of a multilevel logistic regression with interaction terms have limited  
51 intuitive meaning, we calculated marginal effects for reporting. Holding all other  
52  
53  
54

1  
2  
3 variables at their medians, we estimated the effect of changing one predictor variable at a  
4  
5 time.  
6  
7  
8  
9

### 10 *Data extraction and missingness*

11  
12 Our methods for extracting data from the electronic medical record have been described  
13  
14 previously.<sup>16</sup> We considered patients as having each considered diagnosis if it had been  
15  
16 documented at any time before or at the analyzed visit. For creatinine and other lab  
17  
18 testing, we used the most recent measurement up to and including the day of the clinic  
19  
20 visit. We used multiple imputation by chained equations to address missing data and  
21  
22 previously described standards to ensure multiple imputation did not introduce Monte  
23  
24 Carlo error.<sup>17</sup> We imputed predictor variables other than those with negligible missing  
25  
26 data: age, sex, vital signs, and binary variables indicating previous diagnoses.  
27  
28  
29  
30  
31  
32  
33  
34

### 35 *Patient and Public Involvement*

36  
37 Patients were not involved in the design of this study.  
38  
39  
40  
41

## 42 **Results**

43  
44 Overall, 5.2% of visits to the preoperative clinic led to a cancelled or completed  
45  
46 preoperative stress test (8,303/159,795), with 5.1% (8,085; 97.4% of those referred)  
47  
48 completing the test. Patient demographics, selected risk factors, and proportions of  
49  
50 missing data are shown in Tables 1 and 2. Unadjusted physician referral rates are shown in  
51  
52  
53  
54

55  
56 10  
57  
58  
59  
60

1  
2  
3 Figure 1.  
4  
5  
6  
7

8 Marginal testing rates across each predictor variable, with other variables at their  
9  
10 respective medians, are shown in Table 3. In general, patients were more likely to be  
11  
12 referred for preoperative stress testing as estimated perioperative risk increased and for  
13  
14 specific categories of surgeries (aortic, peripheral vascular, and urologic). Of those,  
15  
16 patients undergoing aortic surgery were most likely to be referred for stress testing,  
17  
18 though our dataset included relatively few aortic surgeries and confidence intervals for  
19  
20 that predictor were wide. Even after adjusting for all other factors, different providers  
21  
22 were more likely to refer for preoperative stress testing than others: a visit to the 95<sup>th</sup>  
23  
24 percentile physician in this clinic would result in stress testing 3.8% of the time, while a  
25  
26 visit to the 5<sup>th</sup> percentile physician in this clinic would result in testing around 1.2% of the  
27  
28 time.  
29  
30  
31  
32  
33  
34  
35  
36  
37  
38  
39  
40  
41  
42  
43  
44  
45  
46  
47  
48  
49  
50  
51  
52  
53  
54

55 Other important patient variables included the physician's subjective assessment of  
56  
57 global patient function, METs, socioeconomic advantage or disadvantage compared to  
58  
59 the median, BMI, diastolic blood pressure, existing diagnoses of ischemic heart disease or  
60  
congestive heart failure, estimated probability of obstructive coronary artery disease, and  
tobacco use. Visits later in our dataset were less likely to result in a preoperative stress  
test compared with earlier visits. Each of these variables, while significant, appeared to  
exert less influence than surgical categories, estimated surgical risk, and provider. Fully

11

1  
2  
3 adjusted provider marginal rates are shown in Figure 2.  
4  
5

6  
7  
8 Results were very similar for models clustered by patient or physician. Information  
9  
10 criteria would slightly favor a model clustered by physician (BIC: 51040) compared to a  
11  
12 model clustered by patient with a physician indicator variable (BIC: 52009). Meanwhile,  
13  
14 the model clustered by physician had a slightly lower  $R^2$  (0.1896) compared with a model  
15  
16 clustered by patient with physician as an indicator variable (0.1907).  
17  
18  
19  
20  
21  
22  
23

## 24 Discussion

25  
26 In this cohort of patients seen for preoperative risk assessment at a single health system,  
27  
28 we have identified key drivers of preoperative stress testing, which include type of  
29  
30 surgery, estimated surgical risk, and patient functional status. Our results demonstrate  
31  
32 use of preoperative stress testing in a real-world cohort.  
33  
34  
35  
36  
37

38  
39 Current guidelines recommend preoperative stress testing for patients whose predicted  
40  
41 perioperative adverse cardiac event risk exceeds 1% and whose functional capacity is poor  
42  
43 or unknown, when such testing would change clinical management. Although we cannot  
44  
45 determine from these data whether physicians thought testing would change  
46  
47 management, and predicted surgical risk scores have poor concordance across the 1%  
48  
49 threshold, patients able to perform four or more metabolic equivalents of activity made  
50  
51 up nearly one-third of all stress test referrals.<sup>2,10,18</sup> Our data suggest that substantial  
52  
53  
54

55 12  
56  
57  
58  
59  
60

1  
2  
3 numbers of preoperative stress tests are against current guidance.  
4  
5  
6  
7

8 Still, predicted surgical risk is a key driver of preoperative stress testing. Testing rates  
9  
10 increased with increasing RCRI, without a clear dichotomization at any particular value of  
11  
12 RCRI. And interestingly, although MICA was essentially never documented, a MICA-  
13  
14 predicted surgical risk of greater than 1% appears to be a better single predictor variable  
15  
16 than RCRI. Physicians could be trying to incorporate the guideline-recommended  
17  
18 threshold into their decision-making while relying on cohorts with different calibration,  
19  
20 or could be deliberately avoiding a stark dichotomization of risk at 1%.<sup>10,18</sup>  
21  
22  
23  
24  
25  
26

27 As with predicted surgical risk, physicians appeared to consider functional status as  
28  
29 something between the dichotomy of current guidance and continuum of risk  
30  
31 encountered in clinical practice. Testing rates were higher among less functional patients  
32  
33 and lower among patients able to achieve higher METs, but neither were especially  
34  
35 important predictors in our model. It seems probable that clinical decision-making is  
36  
37 more nuanced than we can discern from our data source. For example, physicians could  
38  
39 reasonably be more inclined to test before a pancreaticoduodenectomy than laparoscopic  
40  
41 cholecystectomy in view of those procedures' very different metabolic demands, but we  
42  
43 lack sufficient power to test individual surgical procedures without overfitting.<sup>12</sup> In any  
44  
45 case, these variables explained little variance in testing rates.  
46  
47  
48  
49  
50  
51  
52  
53  
54

55 13  
56  
57  
58  
59  
60



1  
2  
3 Surgical category also offers insights into testing rationale. Patients were tested more  
4 frequently before aortic or peripheral vascular interventions, perhaps reflecting persistent  
5 beliefs that patients with coronary artery disease should be identified and revascularized  
6 before vascular surgery.<sup>19-21</sup> However, patients undergoing vascular surgery are generally  
7 evaluated elsewhere at our institution, leaving our sample small and confidence intervals  
8 wide. We also note that patients are more likely to be referred for stress testing before  
9 urologic surgery, in spite of no higher intrinsic cardiac risk, compared to other common  
10 surgical categories. Anecdotally, physicians practicing in this clinic have reported that a  
11 number of urologists at our institution are reluctant to operate on high-risk patients  
12 unless those patients first undergo preoperative testing. While investigating such a  
13 hypothesis would require a different approach than ours, clearly every physician in a  
14 preoperative clinic functions within a larger system of care and must build consensus  
15 among a team of treating physicians.

16  
17  
18  
19  
20  
21  
22  
23  
24  
25  
26  
27  
28  
29  
30  
31  
32  
33  
34  
35  
36  
37 Other significant predictor variables include tobacco use, BMI, diastolic blood pressure,  
38 ischemic heart disease, and a patient's census block group. Because each of these are  
39 correlated with risk of obstructive coronary artery disease, one possibility is that data  
40 unavailable to us (such as outside records) led to some portion of the preoperative stress  
41 testing we observed. Although that remains possible, multiple observations argue against  
42 a simple explanation that these variables are proxies for coronary disease risk. First,  
43 higher probability of obstructive coronary artery disease, calculated based on available

1  
2  
3 data, was associated with lower likelihood of preoperative testing. Second, patients  
4  
5 residing in the wealthiest and poorest census tracts were approximately as likely to be  
6  
7 referred for stress testing, with patients in the middle of the socioeconomic range less  
8  
9 likely. Finally, diabetes was not associated with testing. It would seem that either  
10  
11 physicians in our dataset did not incorporate patients' pretest probability of obstructive  
12  
13 coronary disease in their decision to refer for testing, or that their assessments were  
14  
15 poorly calibrated.  
16  
17  
18  
19  
20  
21  
22

23 Rates of testing have declined over time in our dataset, in contrast with increasing testing  
24  
25 rates suggested by other datasets.<sup>22,23</sup> Our data are unable to answer whether this decline  
26  
27 is specific to our site over this time period or part of a wider change in practice. Our  
28  
29 dataset does not suggest a clear change in testing rates after the release of current  
30  
31 guidelines, and therefore argues against a causal relationship between publication of the  
32  
33 current guideline and changes in testing rates.  
34  
35  
36  
37  
38  
39

40 Our model demonstrates physician practice variation: with all other predictors held at  
41  
42 their medians, the physician at the 95<sup>th</sup> percentile was around three times as likely to  
43  
44 order preoperative stress testing than the physician at the 5<sup>th</sup> percentile. But we would  
45  
46 caution against using our results, or others, for profiling individual providers, which is  
47  
48 generally a low-reliability exercise and prone to gaming.<sup>24</sup> Our dataset is among the  
49  
50 largest clinical datasets of preoperative risk assessment, but true outliers are rare and  
51  
52  
53  
54

1  
2  
3 most physicians are not detectably different from the mean after adjustment (see Figure  
4  
5  
6 2). As with other observations of physician practice variation, ours suggests a deeper  
7  
8 failure: that our field has yet to fully understand how preoperative stress testing might be  
9  
10 used to mitigate perioperative cardiac risk.<sup>25</sup>  
11  
12  
13  
14

15 Operative intervention carries inherent cardiac risk, and stress testing may reflect  
16  
17 physician discomfort with the malpractice or cognitive liabilities that cardiac risk  
18  
19 incurs.<sup>26-30</sup> Of course, stress testing does not in itself mitigate operative risk: it can inform  
20  
21 diagnosis and prognosis, but without an intervention that is allocated based on test  
22  
23 results and reduces cardiac risk, it cannot be therapeutic. Such an intervention has  
24  
25 proven elusive: preoperative revascularization did not reduce cardiac risk in the largest  
26  
27 randomized trial to date, beta blockers are more likely harmful than helpful, and other  
28  
29 interventions (e.g., statins) that may be allocated differently based on stress testing likely  
30  
31 have modest effects, if any.<sup>31-34</sup> Intraoperative care or postoperative testing patterns could  
32  
33 differ based on whether a preoperative stress test was performed, but what practices in  
34  
35 those settings might reduce the risk of major adverse cardiac events remain equally  
36  
37 unclear. While estimated perioperative cardiac risk appears to drive stress testing, it  
38  
39 remains to be seen how stress testing might reduce perioperative cardiac risk.  
40  
41  
42  
43  
44  
45  
46  
47  
48  
49

50 Although we have made every effort to ensure the internal validity of our data, analysis,  
51  
52 and results, we cannot be sure about the representativeness of our findings. Our data may  
53  
54

1  
2  
3 not adequately represent drivers of or variation in preoperative stress testing before some  
4  
5 common types of surgery, including ophthalmologic surgery, who are evaluated  
6  
7 elsewhere in our institution.<sup>35</sup> This clinic has made substantial efforts to provide uniform  
8  
9 care, which could have reduced physician variation in our dataset, and we cannot analyze  
10  
11 variation across health system or region, which can also be substantial.<sup>36</sup> As with any  
12  
13 single-center study, we would urge caution when generalizing to other settings. For  
14  
15 example, we found higher rates of testing before urologic surgery than would be expected  
16  
17 for cardiac risk; other centers may have different surgical categories with testing out of  
18  
19 proportion to surgical risk. The need to build a consensus plan of care among a treatment  
20  
21 team is true across institutions, but the particulars of our institution's consensus may not  
22  
23 be.  
24  
25  
26  
27  
28  
29  
30  
31

32 Additionally, as with other observational studies, our analytical choices are difficult to  
33  
34 separate from our theoretical framework, and may influence our results in various ways.<sup>37</sup>  
35  
36 For example, we rejected physician experience as a predictor of testing in favor of a  
37  
38 random effect for each physician and the date of each visit due to AIC and BIC. Still,  
39  
40 experience differs by physician and necessarily accrues over time. A reasonable  
41  
42 investigator with a different theoretical model could assume broadly stable testing rates  
43  
44 over time and conclude that testing decreases as physicians gain experience (see  
45  
46 Supplemental Appendix). Time in particular is rife with potential confounders of this sort.  
47  
48  
49  
50  
51  
52  
53  
54

1  
2  
3 But while the limitations of our study reflect the limitations of any single center  
4  
5 observational study, the detailed clinical data available to us offers distinct advantages.  
6  
7  
8 We have demonstrated real-world use of preoperative stress testing before a wide range  
9  
10 of possible surgical interventions, using visit-level data to comprehensively assess  
11  
12 variation in and predictors of preoperative cardiac stress testing.  
13  
14  
15

16  
17  
18 In summary, use of preoperative stress testing varied with estimated surgical risk, patient  
19  
20 functional status, socioeconomic status, ischemic heart disease, congestive heart failure,  
21  
22 body mass index, diastolic blood pressure, surgical category, and provider. The fraction of  
23  
24 patients referred for stress testing appears to be declining over time, but testing remains  
25  
26 common and highly dependent on the provider. The value of preoperative stress testing  
27  
28 remains to be established.  
29  
30  
31  
32  
33  
34  
35  
36  
37  
38  
39  
40  
41  
42  
43  
44  
45  
46  
47  
48  
49  
50  
51  
52  
53  
54

**Funding Sources:**

This work was funded by NHLBI 1K08HL141598.

**Conflict of Interest Disclosures:**

None

**Author Contributions:**

Dr. Pappas: This author conceived the study, collected the data, performed the analysis, and wrote the initial draft of the manuscript.

Dr. Sessler: This author helped improve the analysis and revised the manuscript.

Dr. Auerbach: This author helped improve the analysis and revised the manuscript.

Dr. Kattan: This author helped improve the analysis and revised the manuscript.

Mr. Milinovich: This author helped obtain and validate data.

Dr. Blackstone: This author helped improve the analysis and revised the manuscript.

Dr. Rothberg: This author helped improve the analysis and revised the manuscript.

## References

1. Fleisher LA, Fleischmann KE, Auerbach AD, et al. 2014 ACC/AHA guideline on perioperative cardiovascular evaluation and management of patients undergoing noncardiac surgery: executive summary: a report of the American College of Cardiology/American Heart Association Task Force on Practice Guidelines. *Circulation*. 2014;130(24):2215-2245. doi:10.1161/CIR.000000000000105
2. Pappas MA, Sessler DI, Rothberg MB. Anticipated Rates and Costs of Guideline-Concordant Preoperative Stress Testing. *Anesth Analg*. 2019;128(2):241-246. doi:10.1213/ANE.0000000000003754
3. Glance LG, Faden E, Dutton RP, et al. Impact of the choice of risk model for identifying low-risk patients using the 2014 American college of cardiology/American Heart Association perioperative guidelines. *Anesthesiology*. 2018;129(5):889-900. doi:10.1097/ALN.0000000000002341
4. Hlatky MA, Boineau RE, Higginbotham MB, et al. A brief self-administered questionnaire to determine functional capacity (The Duke Activity Status Index). *Am J Cardiol*. 1989;64(10):651-654. doi:10.1016/0002-9149(89)90496-7
5. Reilly DF, McNeely MJ, Doerner D, et al. Self-reported exercise tolerance and the risk of serious perioperative complications. *Arch Intern Med*. 1999;159(18):2185-2192. doi:10.1001/archinte.159.18.2185
6. Melon CC, Eshtiaghi P, Luksun WJ, Wijesundera DN. Validated questionnaire vs physicians' judgment to estimate preoperative exercise capacity. *JAMA Intern Med*.

20

- 2014;174(9):1507-1508. doi:10.1001/jamainternmed.2014.2914
7. Wijeyesundera DN, Pearse RM, Shulman MA, et al. Assessment of functional capacity before major non-cardiac surgery: an international, prospective cohort study. *Lancet*. 2018;391(10140):2631-2640. doi:10.1016/S0140-6736(18)31131-0
  8. Eddy DM. Variations in physician practice: The role of uncertainty. *Health Aff*. 1984;3(2):74-89. doi:10.1377/hlthaff.3.2.74
  9. Mark DB, Federspiel JJ, Cowper PA, et al. Economic Outcomes With Anatomical Versus Functional Diagnostic Testing for Coronary Artery Disease. *Ann Intern Med*. 2016;165(2):94-102. doi:10.7326/M15-2639
  10. Lee TH, Marcantonio ER, Mangione CM, et al. Derivation and prospective validation of a simple index for prediction of cardiac risk of major noncardiac surgery. *Circulation*. 1999;100(10):1043-1049. doi:10.1161/01.CIR.100.10.1043
  11. Gupta PK, Gupta H, Sundaram A, et al. Development and validation of a risk calculator for prediction of cardiac risk after surgery. *Circulation*. 2011;124(4):381-387. doi:10.1161/CIRCULATIONAHA.110.015701
  12. Liu JB, Liu Y, Cohen ME, Ko CY, Sweitzer BJ. Defining the Intrinsic Cardiac Risks of Operations to Improve Preoperative Cardiac Risk Assessments. *Anesthesiology*. 2018;128(2):283-292. doi:10.1097/ALN.0000000000002024
  13. Oken MM, Creech RH, Davis TE. Toxicology and response criteria of the Eastern Cooperative Oncology Group. *Am J Clin Oncol*. 1982;5(6):649-655. doi:10.1097/00000421-198212000-00014



- 1  
2  
3 14. Kind AJH, Buckingham WR. Making neighborhood-disadvantage metrics accessible  
4  
5 - The neighborhood atlas. *N Engl J Med*. 2018;378(26):2456-2458.  
6  
7  
8 doi:10.1056/NEJMp1802313  
9
- 10 15. Genders TSS, Steyerberg EW, Hunink MGM, et al. Prediction model to estimate  
11  
12 presence of coronary artery disease: Retrospective pooled analysis of existing  
13  
14 cohorts. *BMJ*. 2012;344(7862). doi:10.1136/bmj.e3485  
15  
16  
17
- 18 16. Milinovich A, Kattan MW. Extracting and utilizing electronic health data from Epic  
19  
20 for research. *Ann Transl Med*. 2018;6(3):42-42. doi:10.21037/atm.2018.01.13  
21  
22
- 23 17. White IR, Royston P, Wood AM. Multiple imputation using chained equations:  
24  
25 Issues and guidance for practice. *Stat Med*. 2011;30(4):377-399. doi:10.1002/sim.4067  
26  
27
- 28 18. Duceppe E, Parlow J, MacDonald P, et al. Canadian Cardiovascular Society  
29  
30 Guidelines on Perioperative Cardiac Risk Assessment and Management for Patients  
31  
32 Who Undergo Noncardiac Surgery. *Can J Cardiol*. 2017;33(1):17-32.  
33  
34  
35 doi:10.1016/j.cjca.2016.09.008  
36
- 37 19. Eagle KA, Singer DE, Brewster DC, Darling RC, Mulley AG, Boucher CA.  
38  
39 Dipyridamole-thallium scanning in patients undergoing vascular surgery.  
40  
41  
42 Optimizing preoperative evaluation of cardiac risk. *JAMA*. 1987;257(16):2185-2189.  
43  
44
- 45 20. Hertzner NR, Beven EG, Young JR, et al. Coronary artery disease in peripheral  
46  
47 vascular patients. A classification of 1000 coronary angiograms and results of  
48  
49 surgical management. *Ann Surg*. 1984;199(2):223-233. doi:10.1097/0000658-  
50  
51  
52 198402000-00016  
53  
54

22

- 1  
2  
3 21. Boucher CA, Brewster DC, Darling RC, Okada RD, Strauss HW, Pohost GM.  
4  
5 Determination of Cardiac Risk by Dipyridamole-Thallium Imaging before  
6  
7 Peripheral Vascular Surgery. *N Engl J Med*. 1985;312(7):389-394.  
8  
9  
10 doi:10.1056/NEJM198502143120701  
11  
12  
13 22. Sheffield KM, McAdams PS, Benarroch-Gampel J, et al. Overuse of preoperative  
14  
15 cardiac stress testing in medicare patients undergoing elective noncardiac surgery.  
16  
17 *Ann Surg*. 2013;257(1):73-80. doi:10.1097/SLA.0b013e31826bc2f4  
18  
19  
20 23. Sigmund AE, Stevens ER, Blitz JD, Ladapo JA. Use of preoperative testing and  
21  
22 physicians' response to professional society guidance. *JAMA Intern Med*.  
23  
24 2015;175(8):1352-1359. doi:10.1001/jamainternmed.2015.2081  
25  
26  
27 24. Hofer TP, Hayward RA, Greenfield S, Wagner EH, Kaplan SH, Manning WG. The  
28  
29 unreliability of individual physician "report cards" for assessing the costs and  
30  
31 quality of care of a chronic disease. *J Am Med Assoc*. 1999;281(22):2098-2105.  
32  
33  
34 doi:10.1001/jama.281.22.2098  
35  
36  
37 25. Wennberg JE, Freeman JL, Culp WJ. Are Hospital Services Rationed in New Haven  
38  
39 or Over-Utilized in Boston? *Lancet*. 1987;329(8543):1185-1189. doi:10.1016/S0140-  
40  
41 6736(87)92152-0  
42  
43  
44 26. Saint S, Vaughn VM, Chopra V, Fowler KE, Kachalia A. Perception of Resources  
45  
46 Spent on Defensive Medicine and History of Being Sued Among Hospitalists:  
47  
48 Results from a National Survey. *J Hosp Med*. 2018;13(1):26-29. doi:10.12788/jhm.2800  
49  
50  
51 27. Feinstein AR. The 'Chagrin Factor' and Qualitative Decision Analysis. *Arch Intern*  
52  
53  
54

23

- 1  
2  
3 *Med.* 1985;145(7):1257-1259. doi:10.1001/archinte.1985.00360070137023  
4  
5  
6 28. Rolfe A, Burton C. Reassurance after Diagnostic Testing with a Low Pretest  
7  
8 Probability of Serious Disease: Systematic Review and Meta-analysis. *JAMA Intern*  
9  
10 *Med.* 2013;173(6):407-416. doi:10.1001/jamainternmed.2013.2762  
11  
12  
13 29. Van der Weijden T, Van Velsen M, Dinant GJ, Van Hasselt CM, Grol R.  
14  
15 Unexplained complaints in general practice: Prevalence, patients' expectations, and  
16  
17 professionals' test-ordering behavior. *Med Decis Mak.* 2003;23(3):226-231.  
18  
19  
20 doi:10.1177/0272989X03023003004  
21  
22  
23 30. Little P, Dorward M, Warner G, Stephens K, Senior J, Moore M. Importance of  
24  
25 patient pressure and perceived pressure and perceived medical need for  
26  
27 investigations, referral, and prescribing in primary care: Nested observational  
28  
29 study. *Br Med J.* 2004;328(7437):444-446. doi:10.1136/bmj.38013.644086.7c  
30  
31  
32 31. McFalls EO, Ward HB, Moritz TE, et al. Coronary-Artery Revascularization before  
33  
34 Elective Major Vascular Surgery. *N Engl J Med.* 2004;351(27):2795-2804.  
35  
36  
37 doi:10.1056/NEJMoao41905  
38  
39  
40 32. Blessberger H, Kammler J, Domanovits H, et al. Perioperative beta-blockers for  
41  
42 preventing surgery-related mortality and morbidity. *Cochrane Database Syst Rev.*  
43  
44 March 2018. doi:10.1002/14651858.CD004476.pub3  
45  
46  
47 33. Berwanger O, Manach Y Le, Suzumura EA, et al. Association between pre-operative  
48  
49 statin use and major cardiovascular complications among patients undergoing non-  
50  
51 cardiac surgery: The VISION study. *Eur Heart J.* 2016;37(2):177-185.  
52  
53  
54  
55  
56  
57  
58  
59  
60

- 1  
2  
3 doi:10.1093/eurheartj/ehv456  
4  
5  
6 34. Berwanger O, de Barros e Silva PGM, Barbosa RR, et al. Atorvastatin for high-risk  
7  
8 statin-naïve patients undergoing noncardiac surgery: The Lowering the Risk of  
9  
10 Operative Complications Using Atorvastatin Loading Dose (LOAD) randomized  
11  
12 trial. *Am Heart J*. 2017;184:88-96. doi:10.1016/j.ahj.2016.11.001  
13  
14  
15 35. Kerr EA, Chen J, Sussman JB, Klamerus ML, Nallamothu BK. Stress Testing Before  
16  
17 Low-Risk Surgery: So Many Recommendations, So Little Overuse. *JAMA Intern*  
18  
19 *Med*. 2015;175(4):645. doi:10.1001/jamainternmed.2014.7877  
20  
21  
22 36. Home - Dartmouth Atlas of Health Care. <https://www.dartmouthatlas.org/>.  
23  
24 Accessed November 11, 2019.  
25  
26  
27 37. Palpacuer C, Hammas K, Duprez R, Laviolle B, Ioannidis JPA, Naudet F. Vibration  
28  
29 of effects from diverse inclusion/exclusion criteria and analytical choices: 9216  
30  
31 different ways to perform an indirect comparison meta-analysis. *BMC Med*.  
32  
33 2019;17(1):174. doi:10.1186/s12916-019-1409-3  
34  
35  
36  
37  
38  
39  
40  
41  
42  
43  
44  
45  
46  
47  
48  
49  
50  
51  
52  
53  
54  
55  
56  
57  
58  
59  
60

Table 1. Patient and Surgical Characteristics.

|                                                       |             | Total   | Percent of category | Percent of all visits | Completed preoperative stress test | Percent of all preoperative stress tests |
|-------------------------------------------------------|-------------|---------|---------------------|-----------------------|------------------------------------|------------------------------------------|
| <b>Age</b>                                            |             | 159,795 | 100.0%              | 100.0%                | 8,303                              | 100.0%                                   |
| <b>Sex</b>                                            | Female      | 88,738  | 55.5%               | 55.5%                 | 4,079                              | 49.1%                                    |
|                                                       | Male        | 71,055  | 44.5%               | 44.5%                 | 4,224                              | 50.9%                                    |
| <b>Previous diagnosis of ischemic heart disease</b>   | No          | 128,505 | 80.4%               | 80.4%                 | 4,831                              | 58.2%                                    |
|                                                       | Yes         | 31,290  | 19.6%               | 19.6%                 | 3,472                              | 41.8%                                    |
| <b>Previous diagnosis of congestive heart failure</b> | No          | 146,556 | 91.7%               | 91.7%                 | 6,922                              | 83.4%                                    |
|                                                       | Yes         | 13,239  | 8.3%                | 8.3%                  | 1,381                              | 16.6%                                    |
| <b>Previous diagnosis of cerebrovascular disease</b>  | No          | 141,519 | 88.6%               | 88.6%                 | 6,567                              | 79.1%                                    |
|                                                       | Yes         | 18,276  | 11.4%               | 11.4%                 | 1,736                              | 20.9%                                    |
| <b>Systolic Blood Pressure</b>                        |             | 159,488 | 100.0%              | 99.8%                 | 8,285                              | 99.8%                                    |
| <b>Diastolic Blood Pressure</b>                       |             | 159,481 | 100.0%              | 99.8%                 | 8,284                              | 99.8%                                    |
| <b>Body Mass Index</b>                                |             | 157,473 | 100.0%              | 98.5%                 | 8,155                              | 98.2%                                    |
| <b>Creatinine (RCRI categorization)</b>               | ≤ 2.0 mg/dL | 151,885 | 97.1%               | 95.1%                 | 7,695                              | 92.7%                                    |
|                                                       | > 2.0 mg/dL | 4,487   | 2.9%                | 2.8%                  | 542                                | 6.5%                                     |
| <b>Creatinine (MICA categorization)</b>               | ≤ 1.5 mg/dL | 144,369 | 90.3%               | 90.3%                 | 7,128                              | 85.8%                                    |
|                                                       | > 1.5 mg/dL | 12,003  | 7.5%                | 7.5%                  | 1,109                              | 13.4%                                    |
|                                                       | Unknown     | 3,423   | 2.1%                | 2.1%                  | 66                                 | 0.8%                                     |
| <b>Prescribed insulin</b>                             | No          | 147,610 | 92.4%               | 92.4%                 | 7,136                              | 85.9%                                    |
|                                                       | Yes         | 12,185  | 7.6%                | 7.6%                  | 1,167                              | 14.1%                                    |
| <b>RCRI surgical category</b>                         | High risk   | 27,709  | 23.8%               | 17.3%                 | 872                                | 10.5%                                    |
|                                                       | Other       | 88,929  | 76.2%               | 55.7%                 | 360                                | 4.3%                                     |
| <b>Area Deprivation Index</b>                         |             | 126,076 | 100.0%              | 78.9%                 | 7,091                              | 85.4%                                    |
| <b>RCRI (documented)</b>                              | 0           | 50,785  | 75.1%               | 31.8%                 | 1,548                              | 18.6%                                    |
|                                                       | 1           | 12,642  | 18.7%               | 7.9%                  | 988                                | 11.9%                                    |
|                                                       | 2           | 3,321   | 4.9%                | 2.1%                  | 402                                | 4.8%                                     |
|                                                       | 3           | 742     | 1.1%                | 0.5%                  | 108                                | 1.3%                                     |
|                                                       | 4           | 151     | 0.2%                | 0.1%                  | 21                                 | 0.3%                                     |
|                                                       | 5           | 15      | 0.0%                | 0.0%                  | 2                                  | 0.0%                                     |
| <b>RCRI (calculated)</b>                              | 0           | 56,879  | 52.0%               | 35.6%                 | 355                                | 4.3%                                     |

|    |                                                                   |                                            |        |       |       |       |       |
|----|-------------------------------------------------------------------|--------------------------------------------|--------|-------|-------|-------|-------|
| 1  |                                                                   |                                            |        |       |       |       |       |
| 2  |                                                                   |                                            |        |       |       |       |       |
| 3  |                                                                   |                                            |        |       |       |       |       |
| 4  |                                                                   | 1                                          | 36,020 | 32.9% | 22.5% | 393   | 4.7%  |
| 5  |                                                                   | 2                                          | 11,143 | 10.2% | 7.0%  | 245   | 3.0%  |
| 6  |                                                                   | 3                                          | 4,006  | 3.7%  | 2.5%  | 98    | 1.2%  |
| 7  |                                                                   | 4                                          | 1,172  | 1.1%  | 0.7%  | 33    | 0.4%  |
| 8  |                                                                   | 5                                          | 204    | 0.2%  | 0.1%  | 7     | 0.1%  |
| 9  |                                                                   | 6                                          | 12     | 0.0%  | 0.0%  | 0     | 0.0%  |
| 10 |                                                                   |                                            |        |       |       |       |       |
| 11 |                                                                   |                                            |        |       |       |       |       |
| 12 |                                                                   |                                            |        |       |       |       |       |
| 13 | <b>MICA risk estimate</b>                                         | ≤ 1%                                       | 71,448 | 44.7% | 44.7% | 608   | 7.3%  |
| 14 |                                                                   | > 1%                                       | 88,347 | 55.3% | 55.3% | 7,695 | 92.7% |
| 15 |                                                                   |                                            |        |       |       |       |       |
| 16 |                                                                   | 1                                          | 17,991 | 19.1% | 11.3% | 489   | 5.9%  |
| 17 |                                                                   | 1-2                                        | 13,386 | 14.2% | 8.4%  | 634   | 7.6%  |
| 18 |                                                                   | 2                                          | 40,829 | 43.4% | 25.6% | 1,739 | 20.9% |
| 19 | <b>Physician subjective assessment of patient global function</b> | 2-3                                        | 8,588  | 9.1%  | 5.4%  | 646   | 7.8%  |
| 20 |                                                                   | 3                                          | 9,310  | 9.9%  | 5.8%  | 732   | 8.8%  |
| 21 |                                                                   | 3-4                                        | 1,922  | 2.0%  | 1.2%  | 253   | 3.0%  |
| 22 |                                                                   | 4                                          | 1,999  | 2.1%  | 1.3%  | 175   | 2.1%  |
| 23 |                                                                   |                                            |        |       |       |       |       |
| 24 |                                                                   | Medicare                                   | 20,744 | 52.2% | 13.0% | 1,192 | 14.4% |
| 25 | <b>Insurance</b>                                                  | Medicaid                                   | 2,384  | 6.0%  | 1.5%  | 83    | 1.0%  |
| 26 |                                                                   | Private                                    | 14,764 | 37.1% | 9.2%  | 307   | 3.7%  |
| 27 |                                                                   | Other listed insurer                       | 1,881  | 4.7%  | 1.2%  | 53    | 0.6%  |
| 28 |                                                                   |                                            |        |       |       |       |       |
| 29 |                                                                   | 1                                          | 3,325  | 3.0%  | 2.1%  | 9     | 0.1%  |
| 30 |                                                                   | 2                                          | 34,026 | 30.9% | 21.3% | 181   | 2.2%  |
| 31 | <b>ASA Class</b>                                                  | 3                                          | 65,298 | 59.3% | 40.9% | 854   | 10.3% |
| 32 |                                                                   | 4                                          | 7,454  | 6.8%  | 4.7%  | 157   | 1.9%  |
| 33 |                                                                   |                                            |        |       |       |       |       |
| 34 |                                                                   | Anorectal                                  | 1,213  | 1.0%  | 0.8%  | 3     | 0.0%  |
| 35 |                                                                   | Aortic                                     | 115    | 0.1%  | 0.1%  | 34    | 0.4%  |
| 36 |                                                                   | Bariatric                                  | 703    | 0.6%  | 0.4%  | 6     | 0.1%  |
| 37 |                                                                   | Brain                                      | 4,780  | 4.1%  | 3.0%  | 15    | 0.2%  |
| 38 |                                                                   | Breast                                     | 8,541  | 7.4%  | 5.3%  | 17    | 0.2%  |
| 39 |                                                                   | Cardiac                                    | 237    | 0.2%  | 0.1%  | 10    | 0.1%  |
| 40 | <b>MICA surgical category</b>                                     | Ear, nose, throat                          | 3,640  | 3.1%  | 2.3%  | 19    | 0.2%  |
| 41 |                                                                   | Foregut/hepatopancreatobiliary             | 3,252  | 2.8%  | 2.0%  | 37    | 0.4%  |
| 42 |                                                                   | Gallbladder, appendix, adrenals, or spleen | 1,974  | 1.7%  | 1.2%  | 17    | 0.2%  |
| 43 |                                                                   | Gynecologic                                | 7,458  | 6.4%  | 4.7%  | 51    | 0.6%  |
| 44 |                                                                   | Hernia                                     | 2,778  | 2.4%  | 1.7%  | 16    | 0.2%  |
| 45 |                                                                   |                                            |        |       |       |       |       |
| 46 |                                                                   |                                            |        |       |       |       |       |
| 47 |                                                                   |                                            |        |       |       |       |       |
| 48 |                                                                   |                                            |        |       |       |       |       |
| 49 |                                                                   |                                            |        |       |       |       |       |
| 50 |                                                                   |                                            |        |       |       |       |       |
| 51 |                                                                   |                                            |        |       |       |       |       |
| 52 |                                                                   |                                            |        |       |       |       |       |
| 53 |                                                                   |                                            |        |       |       |       |       |
| 54 |                                                                   |                                            |        |       |       |       |       |
| 55 |                                                                   |                                            |        |       |       |       |       |
| 56 |                                                                   |                                            |        |       |       |       |       |
| 57 |                                                                   |                                            |        |       |       |       |       |
| 58 |                                                                   |                                            |        |       |       |       |       |
| 59 |                                                                   |                                            |        |       |       |       |       |
| 60 |                                                                   |                                            |        |       |       |       |       |

|                                                      |                        |         |        |        |       |        |
|------------------------------------------------------|------------------------|---------|--------|--------|-------|--------|
|                                                      | Intestines             | 16,081  | 13.9%  | 10.1%  | 87    | 1.0%   |
|                                                      | Neck                   | 3,076   | 2.7%   | 1.9%   | 18    | 0.2%   |
|                                                      | Nonesophageal thoracic | 290     | 0.2%   | 0.2%   | 4     | 0.0%   |
|                                                      | Orthopedic             | 26,005  | 22.4%  | 16.3%  | 208   | 2.5%   |
|                                                      | Other abdomen          | 1,970   | 1.7%   | 1.2%   | 19    | 0.2%   |
|                                                      | Peripheral vascular    | 1,355   | 1.2%   | 0.8%   | 110   | 1.3%   |
|                                                      | Skin                   | 7,126   | 6.1%   | 4.5%   | 78    | 0.9%   |
|                                                      | Spinal                 | 11,994  | 10.3%  | 7.5%   | 59    | 0.7%   |
|                                                      | Urologic               | 13,423  | 11.6%  | 8.4%   | 414   | 5.0%   |
|                                                      | Vein                   | 48      | 0.0%   | 0.0%   | 3     | 0.0%   |
| <b>Before or after release of current guideline</b>  | Before                 | 98,465  | 61.6%  | 61.6%  | 5,911 | 71.2%  |
|                                                      | After                  | 61,330  | 38.4%  | 38.4%  | 2,392 | 28.8%  |
| <b>Able to perform activities of at least 4 METs</b> | No                     | 90,260  | 56.5%  | 56.5%  | 5,713 | 68.8%  |
|                                                      | Yes                    | 69,535  | 43.5%  | 43.5%  | 2,590 | 31.2%  |
| <b>Tobacco use</b>                                   | Current smoker         | 18,806  | 12.4%  | 11.8%  | 1,028 | 12.4%  |
|                                                      | Former smoker          | 62,067  | 40.9%  | 38.8%  | 3,834 | 46.2%  |
|                                                      | Never smoker           | 70,966  | 46.7%  | 44.4%  | 2,976 | 35.8%  |
| <b>Probability of obstructive CAD</b>                |                        | 159,793 | 100.0% | 100.0% | 8,303 | 100.0% |

Table 2: Summary of continuous variables.

|                                                      | <b>Mean ± SD</b> |
|------------------------------------------------------|------------------|
| <b>Age (years)</b>                                   | 58.8 ± 15.2      |
| <b>Systolic Blood Pressure</b>                       | 129 ± 19.1       |
| <b>Diastolic Blood Pressure</b>                      | 73 ± 11.3        |
| <b>Body Mass Index</b>                               | 30.1 ± 7.6       |
| <b>Creatinine</b>                                    | 1.02 ± 0.85      |
| <b>Area Deprivation Index</b>                        | 54.2 ± 24.6      |
| <b>Estimated METs of activity</b>                    | 5.22 ± 1.35      |
| <b>MICA risk estimate</b>                            | 0.021 ± 0.025    |
| <b>Previous patients seen by physician in clinic</b> | 1,587 ± 1,536    |
| <b>Predicted probability of obstructive CAD</b>      | 0.129 ± 0.136    |



Table 3. Marginal results for each variable in our final model, with all other variables held at their medians.

For example, with all other variables at their respective medians, a visit on June 30, 2008 would have resulted in preoperative stress testing approximately 3.5% of the time, while a visit on June 30, 2018 would have resulted in preoperative stress testing approximately 1.3% of the time. Provider effects are summarized for space considerations; full marginal results by physician are included in the Supplemental Appendix.

| Predictor                                        | Value | Marginal Rate | 95% CI |      |
|--------------------------------------------------|-------|---------------|--------|------|
| <b>MICA estimate &gt; 1%</b>                     | 0     | 0.6%          | 0.6%   | 0.7% |
|                                                  | 1     | 7.1%          | 6.7%   | 7.5% |
| <b>RCRI (documented)</b>                         | 0     | 2.2%          | 2.0%   | 2.3% |
|                                                  | 1     | 2.7%          | 2.5%   | 2.9% |
|                                                  | 2     | 3.4%          | 3.0%   | 3.8% |
|                                                  | 3     | 4.2%          | 3.5%   | 5.0% |
|                                                  | 4     | 5.1%          | 4.0%   | 6.5% |
|                                                  | 5     | 6.4%          | 4.7%   | 8.6% |
| <b>Subjective assessment of patient function</b> | 1     | 2.1%          | 1.9%   | 2.2% |
|                                                  | 2     | 2.4%          | 2.2%   | 2.5% |
|                                                  | 3     | 2.8%          | 2.6%   | 3.0% |
|                                                  | 4     | 3.2%          | 2.9%   | 3.5% |
| <b>Estimated METs</b>                            | 2     | 3.3%          | 2.9%   | 3.7% |
|                                                  | 4     | 2.7%          | 2.5%   | 2.9% |
|                                                  | 8     | 1.8%          | 1.6%   | 1.9% |
| <b>Body mass index</b>                           | 20    | 2.1%          | 1.9%   | 2.3% |
|                                                  | 30    | 2.4%          | 2.2%   | 2.5% |
|                                                  | 40    | 2.7%          | 2.5%   | 2.9% |
|                                                  | 70    | 2.3%          | 2.2%   | 2.5% |
| <b>Diastolic blood pressure</b>                  | 90    | 2.5%          | 2.3%   | 2.7% |
|                                                  | 110   | 2.7%          | 2.4%   | 3.0% |
|                                                  | No    | 2.1%          | 2.0%   | 2.3% |
| <b>Ischemic heart disease</b>                    | Yes   | 3.6%          | 3.3%   | 3.9% |
|                                                  | No    | 2.4%          | 2.2%   | 2.5% |

|                                                 |                     |       |      |       |
|-------------------------------------------------|---------------------|-------|------|-------|
| <b>failure</b>                                  | Yes                 | 2.1%  | 1.9% | 2.3%  |
|                                                 | 10                  | 2.8%  | 2.5% | 3.1%  |
| <b>Area deprivation index</b>                   | 50                  | 2.2%  | 2.0% | 2.3%  |
|                                                 | 90                  | 2.6%  | 2.4% | 2.8%  |
| <b>Predicted probability of obstructive CAD</b> | 5%                  | 2.6%  | 2.4% | 2.7%  |
|                                                 | 10%                 | 2.4%  | 2.3% | 2.6%  |
|                                                 | 20%                 | 2.2%  | 2.1% | 2.4%  |
| <b>Tobacco use</b>                              | Current smoker      | 2.6%  | 2.3% | 2.8%  |
|                                                 | Former smoker       | 2.5%  | 2.3% | 2.7%  |
|                                                 | Neither             | 2.2%  | 2.1% | 2.4%  |
| <b>Date</b>                                     | 2008.06.30          | 3.5%  | 3.2% | 3.8%  |
|                                                 | 2013.06.30          | 2.6%  | 2.4% | 2.8%  |
|                                                 | 2018.06.30          | 1.3%  | 1.2% | 1.4%  |
| <b>Surgical category</b>                        | Aortic              | 23.4% | 6.0% | 91.1% |
|                                                 | Peripheral vascular | 8.7%  | 6.7% | 11.3% |
|                                                 | Urologic            | 9.2%  | 8.3% | 10.2% |
|                                                 | Other               | 1.9%  | 1.7% | 2.0%  |
| <b>Physician (summary)</b>                      | Lowest              | 1.0%  | 0.1% | 4.4%  |
|                                                 | 5th percentile      | 1.2%  | 0.6% | 2.6%  |
|                                                 | Median              | 2.3%  | 2.1% | 2.6%  |
|                                                 | 95th percentile     | 3.8%  | 3.2% | 4.5%  |
|                                                 | Highest             | 6.1%  | 2.7% | 13.5% |

1  
2  
3  
4  
5  
6  
7  
8  
9  
10  
11  
12  
13  
14  
15  
16  
17  
18  
19  
20  
21  
22  
23  
24  
25  
26  
27  
28  
29  
30  
31  
32  
33  
34  
35  
36  
37  
38  
39  
40  
41  
42  
43  
44  
45  
46  
47  
48  
49  
50  
51  
52  
53  
54  
55  
56  
57  
58  
59  
60

**Figure 1:** Unadjusted rates of preoperative stress testing, by physician.

[Attached separately as Figure\_01.tif]

For peer review only

1  
2  
3 **Figure 2:** Mean marginal rates of preoperative stress testing, by physician.  
4  
5

6  
7 [Attached separately as Figure\_o2.tif]  
8  
9  
10  
11  
12  
13  
14  
15  
16  
17  
18  
19  
20  
21  
22  
23  
24  
25  
26  
27  
28  
29  
30  
31  
32  
33  
34  
35  
36  
37  
38  
39  
40  
41  
42  
43  
44  
45  
46  
47  
48  
49  
50  
51  
52  
53  
54

55 33  
56  
57  
58  
59  
60

1  
2  
3  
4  
5  
6  
7  
8  
9  
10  
11  
12  
13  
14  
15  
16  
17  
18  
19  
20  
21  
22  
23  
24  
25  
26  
27  
28  
29  
30  
31  
32  
33  
34  
35  
36  
37  
38  
39  
40  
41  
42  
43  
44  
45  
46  
47  
48  
49  
50  
51  
52  
53  
54  
55  
56  
57  
58  
59  
60

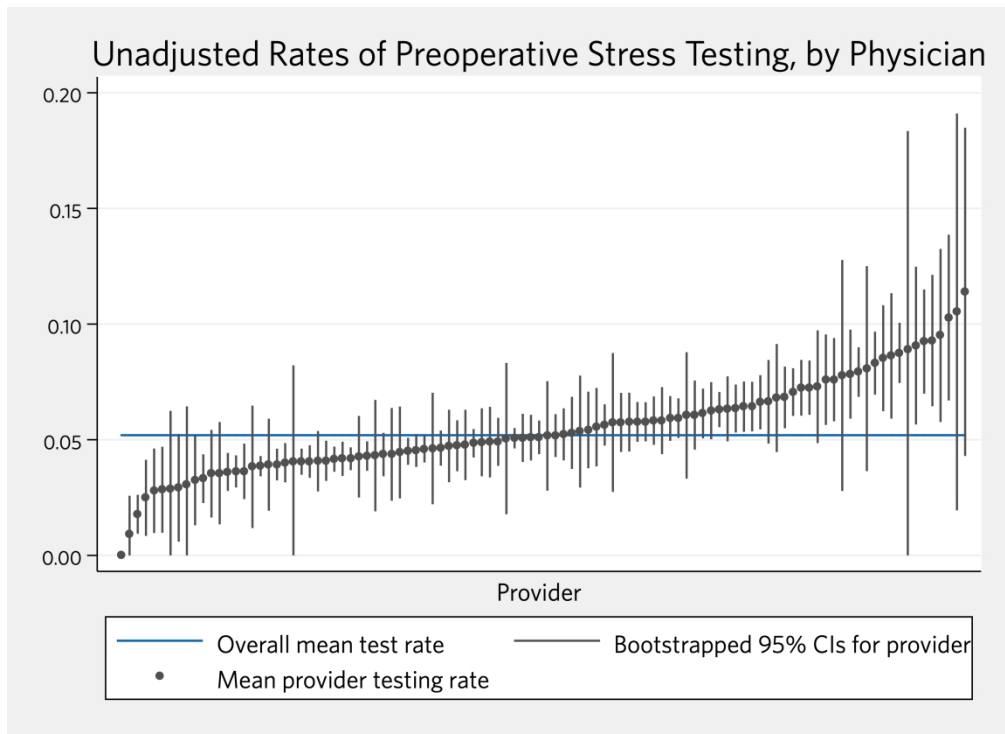

Figure 1: Unadjusted rates of preoperative stress testing, by physician

569x413mm (144 x 144 DPI)

1  
2  
3  
4  
5  
6  
7  
8  
9  
10  
11  
12  
13  
14  
15  
16  
17  
18  
19  
20  
21  
22  
23  
24  
25  
26  
27  
28  
29  
30  
31  
32  
33  
34  
35  
36  
37  
38  
39  
40  
41  
42  
43  
44  
45  
46  
47  
48  
49  
50  
51  
52  
53  
54  
55  
56  
57  
58  
59  
60

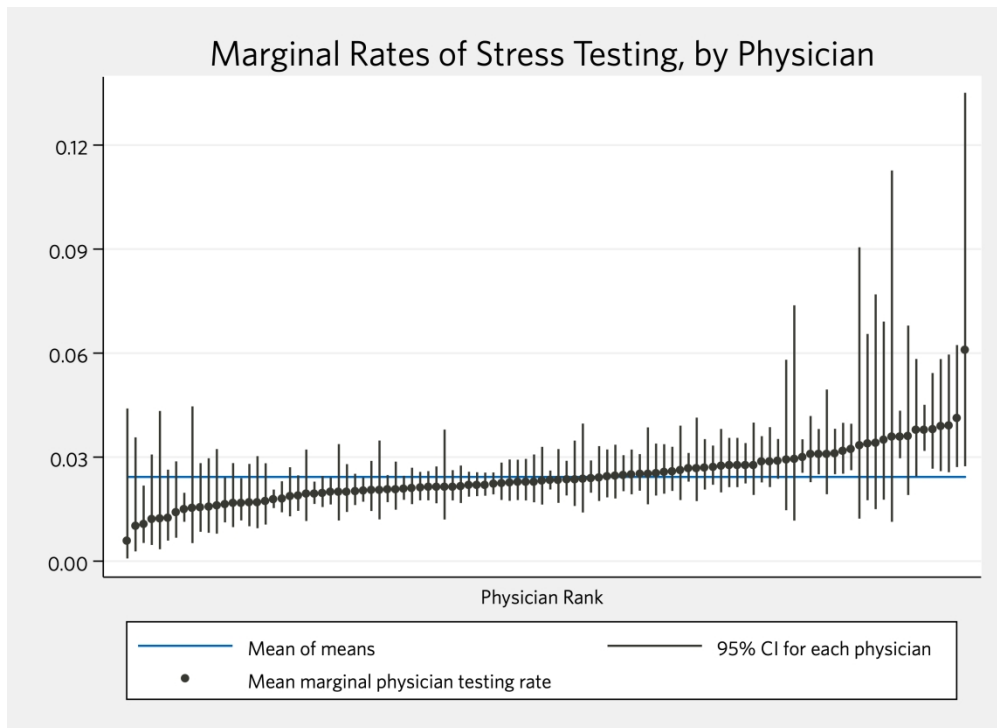

Figure 2: Mean marginal rates of preoperative stress testing, by physician

569x413mm (144 x 144 DPI)

1  
2  
3  
4  
5  
6  
7  
8  
9  
10  
11  
12  
13  
14  
15  
16  
17  
18  
19  
20  
21  
22  
23  
24  
25  
26  
27  
28  
29  
30  
31  
32  
33  
34  
35  
36  
37  
38  
39  
40  
41  
42  
43  
44  
45  
46  
47  
48  
49  
50  
51  
52  
53  
54  
55  
56  
57  
58  
59  
60

Supplemental Material for: Variation in preoperative stress testing by patient, physician, and surgical type

Matthew A Pappas, MD, MPH, Daniel I Sessler, MD, Andrew D Auerbach, MD, MPH, Michael W Kattan, PhD, Alex Milinovich, BA, Eugene Blackstone, MD, and Michael B Rothberg, MD, MPH

|    |                                                               |    |
|----|---------------------------------------------------------------|----|
| 1  |                                                               |    |
| 2  |                                                               |    |
| 3  | 1. Regression results, clustered by physician                 | 3  |
| 4  |                                                               |    |
| 5  | 2. Physician marginal rates of stress testing                 | 4  |
| 6  |                                                               |    |
| 7  | 3. Physician rates of stress testing, unadjusted and marginal | 8  |
| 8  |                                                               |    |
| 9  | 4. Calibration of final model                                 | 9  |
| 10 |                                                               |    |
| 11 | 5. Expected testing rates with an identical population        | 10 |
| 12 |                                                               |    |
| 13 |                                                               |    |
| 14 |                                                               |    |
| 15 |                                                               |    |
| 16 |                                                               |    |
| 17 |                                                               |    |
| 18 |                                                               |    |
| 19 |                                                               |    |
| 20 |                                                               |    |
| 21 |                                                               |    |
| 22 |                                                               |    |
| 23 |                                                               |    |
| 24 |                                                               |    |
| 25 |                                                               |    |
| 26 |                                                               |    |
| 27 |                                                               |    |
| 28 |                                                               |    |
| 29 |                                                               |    |
| 30 |                                                               |    |
| 31 |                                                               |    |
| 32 |                                                               |    |
| 33 |                                                               |    |
| 34 |                                                               |    |
| 35 |                                                               |    |
| 36 |                                                               |    |
| 37 |                                                               |    |
| 38 |                                                               |    |
| 39 |                                                               |    |
| 40 |                                                               |    |
| 41 |                                                               |    |
| 42 |                                                               |    |
| 43 |                                                               |    |
| 44 |                                                               |    |
| 45 |                                                               |    |
| 46 |                                                               |    |
| 47 |                                                               |    |
| 48 |                                                               |    |
| 49 |                                                               |    |
| 50 |                                                               |    |
| 51 |                                                               |    |
| 52 |                                                               |    |
| 53 |                                                               |    |
| 54 |                                                               |    |
| 55 |                                                               |    |
| 56 |                                                               |    |
| 57 |                                                               |    |
| 58 |                                                               |    |
| 59 |                                                               |    |
| 60 |                                                               |    |



# 1. Regression results, clustered by physician

Results have been edited/trimmed for clarity and brevity. Interaction terms have been replaced in the table below with exponents (^2) when applicable. All dichotomous variables (those prepended with "1." in the table) use a value of 0 as the referent.

```
Random-effects logistic regression      Number of obs   =   154,171
Group variable: Physician_ID           Number of groups =     104
Observations per group:                 min =           7
                                         avg =   1,482.4
                                         max =     8,245
```

| Completed or cancelled test   | Beta Coef. | Std. Err. | t     | P> t  | [95% Conf. Interval] |           |
|-------------------------------|------------|-----------|-------|-------|----------------------|-----------|
| 1.aortic_surgery              | 2.522167   | .6078339  | 4.15  | 0.002 | 1.166378             | 3.877956  |
| 1.peripheral_vascular_surgery | 1.531945   | .1152814  | 13.29 | 0.000 | 1.285334             | 1.778556  |
| 1.urologic_surgery            | 1.5871     | .0657605  | 24.13 | 0.000 | 1.446111             | 1.728088  |
| documented_RCRI               | .2135885   | .03032    | 7.04  | 0.000 | .1506825             | .2764944  |
| 1.Gupta_greater_than_1pct     | 2.422218   | .0472362  | 51.28 | 0.000 | 2.329492             | 2.514944  |
| Estimated METs                | -.1030793  | .0128133  | -8.04 | 0.000 | -.1284818            | -.0776767 |
| functional_class              | .1444786   | .0214833  | 6.73  | 0.000 | .1020898             | .1868674  |
| ADI_national                  | -.0141123  | .0025089  | -5.62 | 0.000 | -.0190783            | -.0091463 |
| ADI_national^2                | .0001325   | .0000221  | 5.99  | 0.000 | .0000888             | .0001763  |
| BMI                           | .0120129   | .0016333  | 7.36  | 0.000 | .0088076             | .0152182  |
| DBP                           | .0037949   | .0011446  | 3.32  | 0.001 | .0015493             | .0060406  |
| 1.ischemic_heart_disease      | .5187915   | .0390133  | 13.30 | 0.000 | .4412007             | .5963823  |
| predicted_prob_of_CAD         | -.9799052  | .1105385  | -8.86 | 0.000 | -1.198045            | -.761765  |
| 1.congestive_heart_failure    | -.1196815  | .0476752  | -2.51 | 0.014 | -.2142709            | -.0250922 |
| date                          | .002128    | .0004881  | 4.36  | 0.000 | .0011708             | .0030853  |
| date^2                        | -6.15e-08  | 1.25e-08  | -4.92 | 0.000 | -8.61e-08            | -3.70e-08 |
| 1.current_smoker              | .1436825   | .0424903  | 3.38  | 0.001 | .0603125             | .2270526  |
| 1.former_smoker               | .1288456   | .0290712  | 4.43  | 0.000 | .0718283             | .1858628  |
| constant                      | -23.48573  | 4.748773  | -4.95 | 0.000 | -32.79838            | -14.17308 |
| /lnsig2u                      | -3.592461  | .2658187  |       |       | -4.113895            | -3.071026 |
| sigma_u                       | .1659232   | .0220527  |       |       | .1278436             | .2153451  |
| rho                           | .0082988   | .0021877  |       |       | .0049434             | .0138999  |

## 2. Physician marginal rates of stress testing

Due to space constraints, only selected physician marginal results are displayed in Table 3. Here we present full marginal results by physician. These are also displayed visually in Figure 2.

| Physician Rank | Marginal Rate | 95% CI        |
|----------------|---------------|---------------|
| <b>1</b>       | 0.58%         | 0.08% - 4.40% |
| <b>2</b>       | 1.00%         | 0.28% - 3.57% |
| <b>3</b>       | 1.07%         | 0.52% - 2.18% |
| <b>4</b>       | 1.20%         | 0.47% - 3.08% |
| <b>5</b>       | 1.22%         | 0.34% - 4.33% |
| <b>6</b>       | 1.25%         | 0.59% - 2.64% |
| <b>7</b>       | 1.39%         | 0.68% - 2.88% |
| <b>8</b>       | 1.50%         | 1.13% - 1.97% |
| <b>9</b>       | 1.52%         | 0.52% - 4.46% |
| <b>10</b>      | 1.55%         | 0.85% - 2.83% |
| <b>11</b>      | 1.56%         | 0.82% - 2.97% |
| <b>12</b>      | 1.60%         | 0.79% - 3.23% |
| <b>13</b>      | 1.64%         | 1.12% - 2.42% |
| <b>14</b>      | 1.67%         | 0.98% - 2.83% |
| <b>15</b>      | 1.68%         | 1.17% - 2.39% |
| <b>16</b>      | 1.68%         | 1.01% - 2.80% |
| <b>17</b>      | 1.70%         | 0.95% - 3.03% |
| <b>18</b>      | 1.73%         | 1.05% - 2.82% |
| <b>19</b>      | 1.78%         | 1.53% - 2.06% |
| <b>20</b>      | 1.80%         | 1.41% - 2.30% |
| <b>21</b>      | 1.87%         | 1.29% - 2.71% |
| <b>22</b>      | 1.89%         | 1.45% - 2.47% |
| <b>23</b>      | 1.93%         | 1.16% - 3.22% |
| <b>24</b>      | 1.95%         | 1.65% - 2.29% |

| Physician Rank | Marginal Rate | 95% CI        |
|----------------|---------------|---------------|
| <b>25</b>      | 1.96%         | 1.56% - 2.45% |
| <b>26</b>      | 1.99%         | 1.63% - 2.42% |
| <b>27</b>      | 1.99%         | 1.17% - 3.38% |
| <b>28</b>      | 1.99%         | 1.42% - 2.80% |
| <b>29</b>      | 2.02%         | 1.62% - 2.52% |
| <b>30</b>      | 2.03%         | 1.71% - 2.42% |
| <b>31</b>      | 2.04%         | 1.45% - 2.89% |
| <b>32</b>      | 2.05%         | 1.20% - 3.48% |
| <b>33</b>      | 2.06%         | 1.70% - 2.48% |
| <b>34</b>      | 2.06%         | 1.48% - 2.87% |
| <b>35</b>      | 2.09%         | 1.77% - 2.46% |
| <b>36</b>      | 2.10%         | 1.64% - 2.69% |
| <b>37</b>      | 2.12%         | 1.75% - 2.57% |
| <b>38</b>      | 2.13%         | 1.75% - 2.60% |
| <b>39</b>      | 2.13%         | 1.67% - 2.73% |
| <b>40</b>      | 2.13%         | 1.20% - 3.80% |
| <b>41</b>      | 2.14%         | 1.75% - 2.62% |
| <b>42</b>      | 2.15%         | 1.68% - 2.76% |
| <b>43</b>      | 2.19%         | 1.86% - 2.58% |
| <b>44</b>      | 2.19%         | 1.87% - 2.56% |
| <b>45</b>      | 2.20%         | 1.89% - 2.55% |
| <b>46</b>      | 2.22%         | 1.93% - 2.56% |
| <b>47</b>      | 2.24%         | 1.76% - 2.84% |
| <b>48</b>      | 2.26%         | 1.74% - 2.93% |
| <b>49</b>      | 2.27%         | 1.76% - 2.93% |
| <b>50</b>      | 2.27%         | 1.75% - 2.95% |
| <b>51</b>      | 2.29%         | 1.70% - 3.08% |

| Physician Rank | Marginal Rate | 95% CI        |
|----------------|---------------|---------------|
| <b>52</b>      | 2.32%         | 1.63% - 3.30% |
| <b>53</b>      | 2.32%         | 2.07% - 2.61% |
| <b>54</b>      | 2.33%         | 1.68% - 3.23% |
| <b>55</b>      | 2.34%         | 1.89% - 2.89% |
| <b>56</b>      | 2.35%         | 1.59% - 3.48% |
| <b>57</b>      | 2.36%         | 1.40% - 3.97% |
| <b>58</b>      | 2.39%         | 1.97% - 2.90% |
| <b>59</b>      | 2.40%         | 1.74% - 3.32% |
| <b>60</b>      | 2.43%         | 1.84% - 3.22% |
| <b>61</b>      | 2.46%         | 1.81% - 3.36% |
| <b>62</b>      | 2.48%         | 2.02% - 3.05% |
| <b>63</b>      | 2.49%         | 1.93% - 3.22% |
| <b>64</b>      | 2.50%         | 2.03% - 3.09% |
| <b>65</b>      | 2.51%         | 1.64% - 3.86% |
| <b>66</b>      | 2.53%         | 1.89% - 3.39% |
| <b>67</b>      | 2.56%         | 1.95% - 3.37% |
| <b>68</b>      | 2.58%         | 2.03% - 3.30% |
| <b>69</b>      | 2.62%         | 1.76% - 3.91% |
| <b>70</b>      | 2.68%         | 2.29% - 3.12% |
| <b>71</b>      | 2.68%         | 1.73% - 4.14% |
| <b>72</b>      | 2.70%         | 2.07% - 3.52% |
| <b>73</b>      | 2.71%         | 2.20% - 3.33% |
| <b>74</b>      | 2.75%         | 1.98% - 3.81% |
| <b>75</b>      | 2.75%         | 2.13% - 3.55% |
| <b>76</b>      | 2.75%         | 2.13% - 3.55% |
| <b>77</b>      | 2.76%         | 2.24% - 3.41% |
| <b>78</b>      | 2.76%         | 1.91% - 4.00% |

| Physician Rank | Marginal Rate | 95% CI         |
|----------------|---------------|----------------|
| <b>79</b>      | 2.86%         | 2.27% - 3.60%  |
| <b>80</b>      | 2.87%         | 2.14% - 3.86%  |
| <b>81</b>      | 2.89%         | 2.38% - 3.52%  |
| <b>82</b>      | 2.92%         | 1.47% - 5.81%  |
| <b>83</b>      | 2.94%         | 1.17% - 7.38%  |
| <b>84</b>      | 2.99%         | 2.55% - 3.51%  |
| <b>85</b>      | 3.09%         | 2.28% - 4.19%  |
| <b>86</b>      | 3.09%         | 2.50% - 3.81%  |
| <b>87</b>      | 3.09%         | 1.93% - 4.95%  |
| <b>88</b>      | 3.09%         | 2.51% - 3.82%  |
| <b>89</b>      | 3.17%         | 2.52% - 3.99%  |
| <b>90</b>      | 3.22%         | 2.62% - 3.96%  |
| <b>91</b>      | 3.33%         | 1.23% - 9.05%  |
| <b>92</b>      | 3.39%         | 1.76% - 6.55%  |
| <b>93</b>      | 3.40%         | 1.50% - 7.69%  |
| <b>94</b>      | 3.50%         | 1.77% - 6.91%  |
| <b>95</b>      | 3.57%         | 1.13% - 11.27% |
| <b>96</b>      | 3.59%         | 2.97% - 4.34%  |
| <b>97</b>      | 3.60%         | 1.91% - 6.79%  |
| <b>98</b>      | 3.77%         | 2.44% - 5.83%  |
| <b>99</b>      | 3.79%         | 3.18% - 4.51%  |
| <b>100</b>     | 3.80%         | 2.67% - 5.43%  |
| <b>101</b>     | 3.89%         | 2.60% - 5.83%  |
| <b>102</b>     | 3.91%         | 2.56% - 5.96%  |
| <b>103</b>     | 4.11%         | 2.71% - 6.23%  |
| <b>104</b>     | 6.08%         | 2.74% - 13.51% |

### 3. Physician rates of stress testing, unadjusted and marginal

Figure 1 demonstrates unadjusted rates of stress testing, and Figure 2 demonstrates marginal predictions for each physician, controlling for all other factors. Here we overlay the marginal results on the unadjusted results to demonstrate the effect of adjustment.

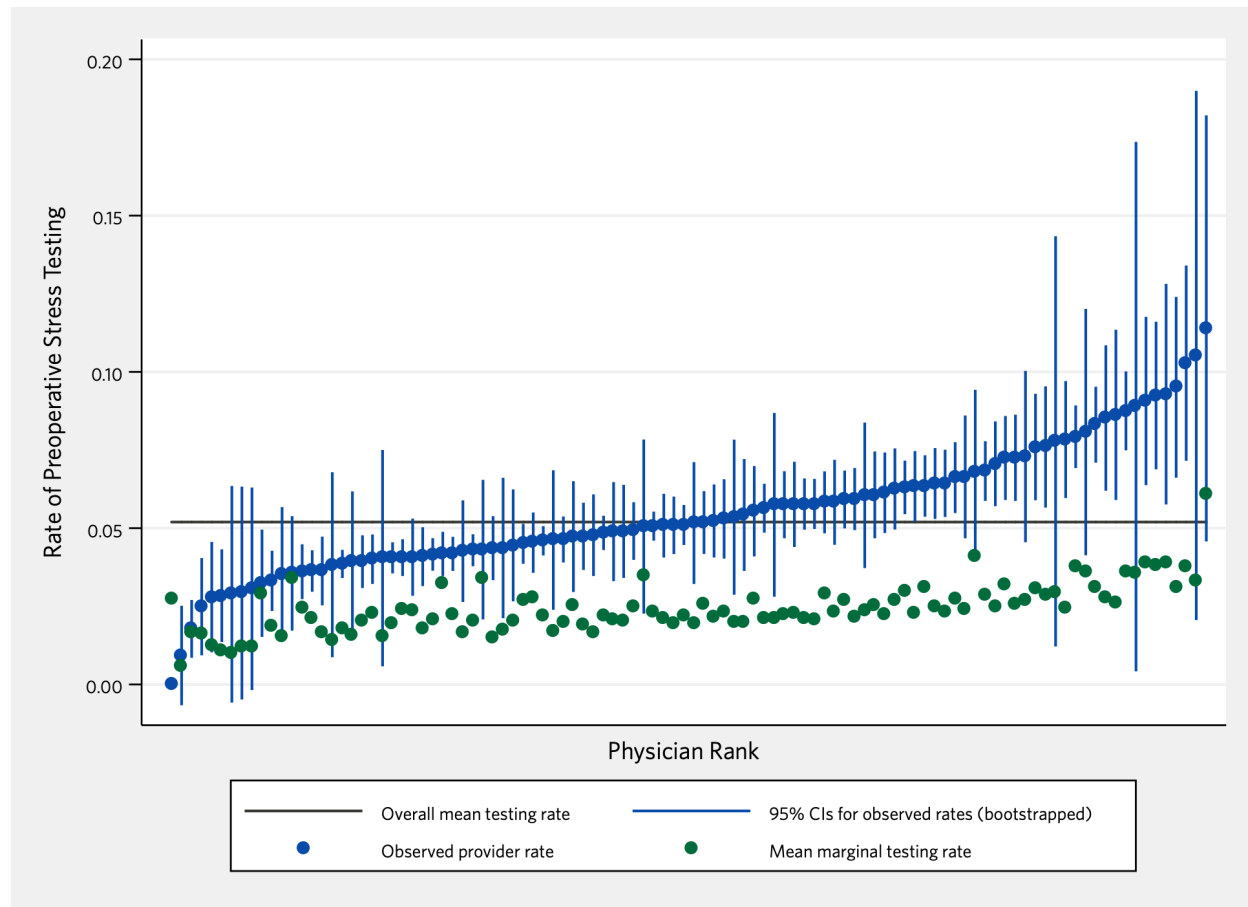

#### 4. Calibration of final model

Based on the plot above, we suspected less-than-ideal calibration of our final model. We do not know of a universally accepted method to assess the calibration of a multilevel model on multiply-imputed data, but in most of our assessments this model fails Hosmer-Lemeshow Goodness-of-Fit testing, and the calibration plot shown here (binned into centiles) indeed suggests poor calibration. We emphasize again that our goal here is to explain variance in testing, not to guide future physicians in who should be referred for stress testing or to enable individual physician profiling.

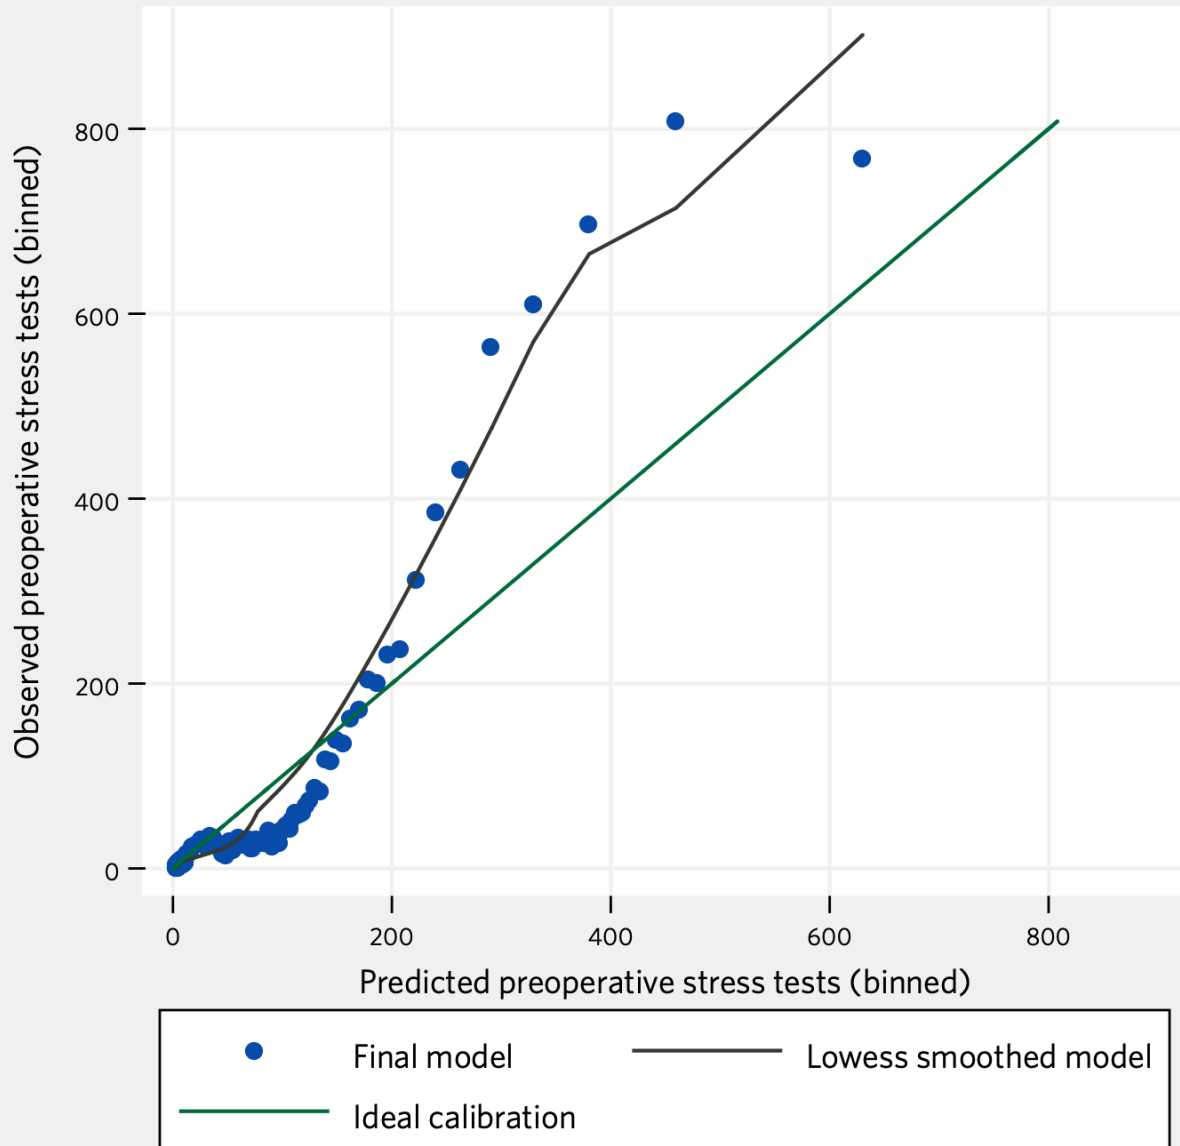

## 5. Expected testing rates with an identical population

One way to contextualize provider effects is to imagine that each provider sees an identical panel of patients and estimate the consequent differences in outcomes. Here, we sampled 1,000 patients from our original population and estimated rates of stress testing if that same cohort were seen by each physician in our dataset. The overall mean is the expected rate for this small cohort without controlling for physician ID.

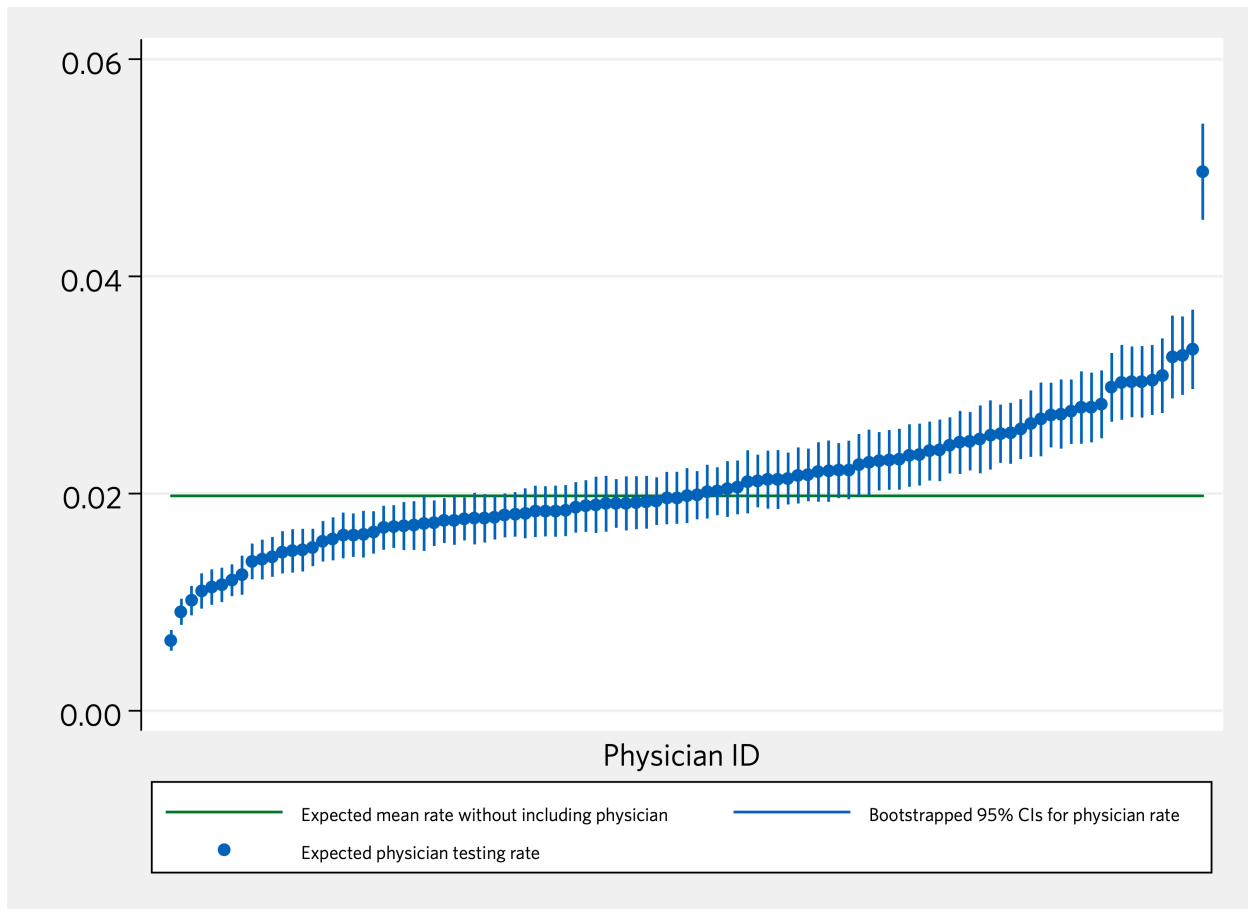



## 6. Marginal testing rate as a function of physician experience

As with all datasets, our conclusions are a product of many decisions. For example, although we rejected physician experience as a predictor of testing rate in favor of date and a physician-specific random effect, reasonable investigators could disagree. To generate the graph below, we replaced date in our model with the number of visits each physician had completed between the beginning of our dataset and the visit in question (a proxy for preoperative experience). We then computed and graphed marginal probabilities as described in our primary results.

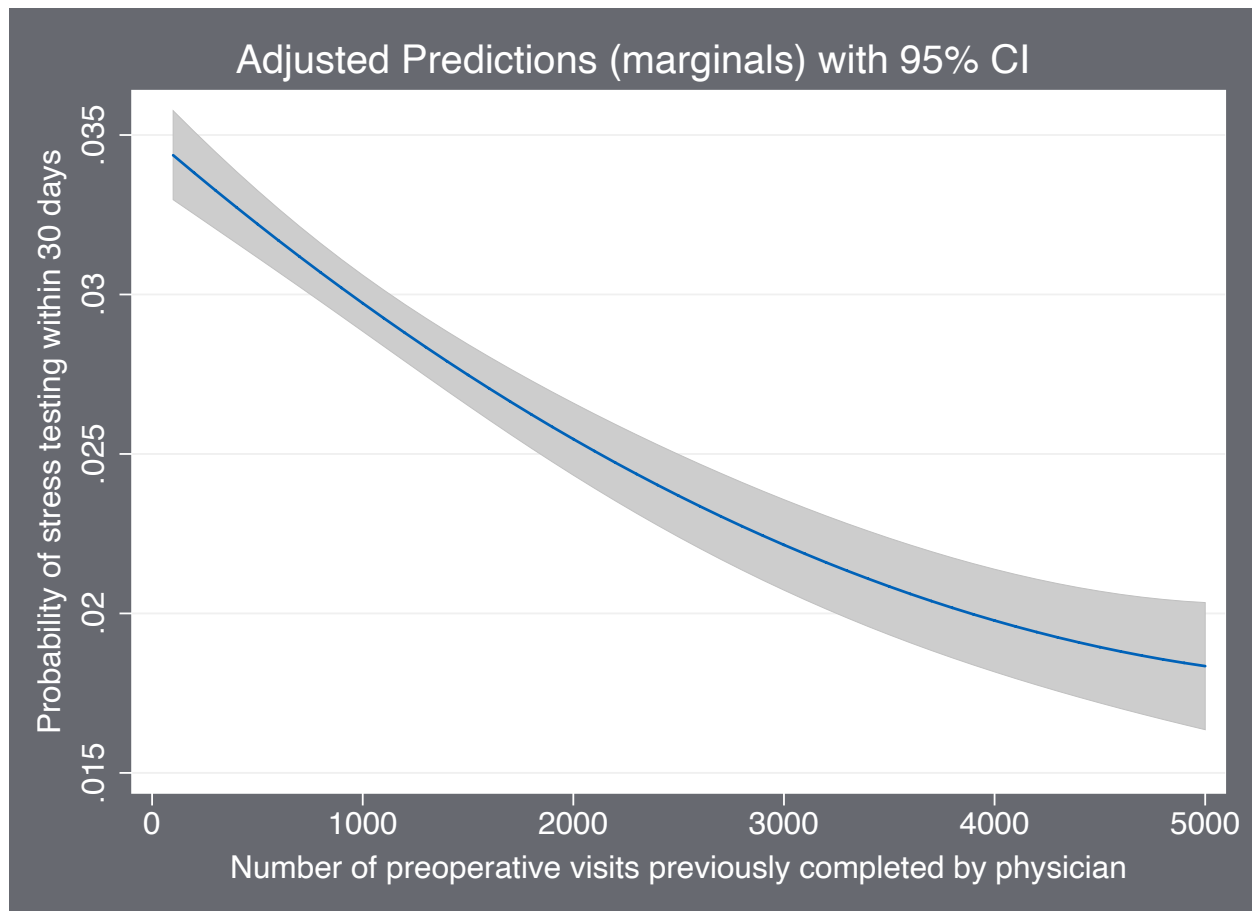

STROBE Statement—Checklist of items that should be included in reports of *cohort studies*

|                              | Item No | Recommendation                                                                                                                                                                                                                                                                                                         | Page No                        |
|------------------------------|---------|------------------------------------------------------------------------------------------------------------------------------------------------------------------------------------------------------------------------------------------------------------------------------------------------------------------------|--------------------------------|
| <b>Title and abstract</b>    | 1       | (a) Indicate the study's design with a commonly used term in the title or the abstract<br>(b) Provide in the abstract an informative and balanced summary of what was done and what was found                                                                                                                          | 2<br>2-3                       |
| <b>Introduction</b>          |         |                                                                                                                                                                                                                                                                                                                        |                                |
| Background/rationale         | 2       | Explain the scientific background and rationale for the investigation being reported                                                                                                                                                                                                                                   | 4                              |
| Objectives                   | 3       | State specific objectives, including any prespecified hypotheses                                                                                                                                                                                                                                                       | 4                              |
| <b>Methods</b>               |         |                                                                                                                                                                                                                                                                                                                        |                                |
| Study design                 | 4       | Present key elements of study design early in the paper                                                                                                                                                                                                                                                                | 5                              |
| Setting                      | 5       | Describe the setting, locations, and relevant dates, including periods of recruitment, exposure, follow-up, and data collection                                                                                                                                                                                        | 4-5                            |
| Participants                 | 6       | (a) Give the eligibility criteria, and the sources and methods of selection of participants. Describe methods of follow-up<br>(b) For matched studies, give matching criteria and number of exposed and unexposed                                                                                                      | 4-5<br>N/A                     |
| Variables                    | 7       | Clearly define all outcomes, exposures, predictors, potential confounders, and effect modifiers. Give diagnostic criteria, if applicable                                                                                                                                                                               | 5                              |
| Data sources/<br>measurement | 8*      | For each variable of interest, give sources of data and details of methods of assessment (measurement). Describe comparability of assessment methods if there is more than one group                                                                                                                                   | 5-8                            |
| Bias                         | 9       | Describe any efforts to address potential sources of bias                                                                                                                                                                                                                                                              | 9-10                           |
| Study size                   | 10      | Explain how the study size was arrived at                                                                                                                                                                                                                                                                              | 5                              |
| Quantitative variables       | 11      | Explain how quantitative variables were handled in the analyses. If applicable, describe which groupings were chosen and why                                                                                                                                                                                           | 5-10                           |
| Statistical methods          | 12      | (a) Describe all statistical methods, including those used to control for confounding<br>(b) Describe any methods used to examine subgroups and interactions<br>(c) Explain how missing data were addressed<br>(d) If applicable, explain how loss to follow-up was addressed<br>(e) Describe any sensitivity analyses | 8-10<br>5-10<br>9-10<br>5<br>5 |
| <b>Results</b>               |         |                                                                                                                                                                                                                                                                                                                        |                                |
| Participants                 | 13*     | (a) Report numbers of individuals at each stage of study—eg numbers potentially eligible, examined for eligibility, confirmed eligible, included in the study, completing follow-up, and analysed<br>(b) Give reasons for non-participation at each stage<br>(c) Consider use of a flow diagram                        | 5,10<br>17                     |
| Descriptive data             | 14*     | (a) Give characteristics of study participants (eg demographic, clinical, social) and information on exposures and potential confounders<br>(b) Indicate number of participants with missing data for each variable of interest<br>(c) Summarise follow-up time (eg, average and total amount)                         | 26-27<br>26<br>5               |
| Outcome data                 | 15*     | Report numbers of outcome events or summary measures over time                                                                                                                                                                                                                                                         | 10                             |

|    |                          |    |                                                                                                                                                                                                              |               |
|----|--------------------------|----|--------------------------------------------------------------------------------------------------------------------------------------------------------------------------------------------------------------|---------------|
| 1  | Main results             | 16 | (a) Give unadjusted estimates and, if applicable, confounder-adjusted estimates and their precision (eg, 95% confidence interval). Make clear which confounders were adjusted for and why they were included | 10-11, 26, 28 |
| 2  |                          |    | (b) Report category boundaries when continuous variables were categorized                                                                                                                                    | 26            |
| 3  |                          |    | (c) If relevant, consider translating estimates of relative risk into absolute risk for a meaningful time period                                                                                             | 28            |
| 4  |                          |    |                                                                                                                                                                                                              |               |
| 5  | Other analyses           | 17 | Report other analyses done—eg analyses of subgroups and interactions, and sensitivity analyses                                                                                                               | 11-12         |
| 6  |                          |    |                                                                                                                                                                                                              |               |
| 7  | <b>Discussion</b>        |    |                                                                                                                                                                                                              |               |
| 8  | Key results              | 18 | Summarise key results with reference to study objectives                                                                                                                                                     | 12-15         |
| 9  | Limitations              | 19 | Discuss limitations of the study, taking into account sources of potential bias or imprecision. Discuss both direction and magnitude of any potential bias                                                   | 16-18         |
| 10 | Interpretation           | 20 | Give a cautious overall interpretation of results considering objectives, limitations, multiplicity of analyses, results from similar studies, and other relevant evidence                                   | 18            |
| 11 | Generalisability         | 21 | Discuss the generalisability (external validity) of the study results                                                                                                                                        | 17            |
| 12 | <b>Other information</b> |    |                                                                                                                                                                                                              |               |
| 13 | Funding                  | 22 | Give the source of funding and the role of the funders for the present study and, if applicable, for the original study on which the present article is based                                                | 1,19          |
| 14 |                          |    |                                                                                                                                                                                                              |               |

\*Give information separately for exposed and unexposed groups.

**Note:** An Explanation and Elaboration article discusses each checklist item and gives methodological background and published examples of transparent reporting. The STROBE checklist is best used in conjunction with this article (freely available on the Web sites of PLoS Medicine at <http://www.plosmedicine.org/>, Annals of Internal Medicine at <http://www.annals.org/>, and Epidemiology at <http://www.epidem.com/>). Information on the STROBE Initiative is available at <http://www.strobe-statement.org>.

# BMJ Open

## Variation in preoperative stress testing by patient, physician, and surgical type – a cohort study

|                                 |                                                                                                                                                                                                                                                                                                                                                                                                                                              |
|---------------------------------|----------------------------------------------------------------------------------------------------------------------------------------------------------------------------------------------------------------------------------------------------------------------------------------------------------------------------------------------------------------------------------------------------------------------------------------------|
| Journal:                        | <i>BMJ Open</i>                                                                                                                                                                                                                                                                                                                                                                                                                              |
| Manuscript ID                   | bmjopen-2020-048052.R1                                                                                                                                                                                                                                                                                                                                                                                                                       |
| Article Type:                   | Original research                                                                                                                                                                                                                                                                                                                                                                                                                            |
| Date Submitted by the Author:   | 19-Jul-2021                                                                                                                                                                                                                                                                                                                                                                                                                                  |
| Complete List of Authors:       | Pappas, Matthew; Cleveland Clinic, Department of Hospital Medicine<br>Sessler, Daniel; Cleveland Clinic, Outcomes Research<br>Auerbach, A; University of California, San Francisco<br>Kattan, Michael; Cleveland Clinic<br>Milinovich, Alex; Cleveland Clinic<br>Blackstone, Eugene; Cleveland Clinic, Miller Family Heart and Vascular Institute<br>Rothberg, Michael B.; Cleveland Clinic, Cleveland, USA, Department of Internal Medicine |
| <b>Primary Subject Heading</b>: | Health services research                                                                                                                                                                                                                                                                                                                                                                                                                     |
| Secondary Subject Heading:      | Cardiovascular medicine, Anaesthesia, Surgery, General practice / Family practice                                                                                                                                                                                                                                                                                                                                                            |
| Keywords:                       | INTERNAL MEDICINE, Adult surgery < SURGERY, Adult anaesthesia < ANAESTHETICS, Adult cardiology < CARDIOLOGY, HEALTH SERVICES ADMINISTRATION & MANAGEMENT                                                                                                                                                                                                                                                                                     |
|                                 |                                                                                                                                                                                                                                                                                                                                                                                                                                              |

SCHOLARONE™  
Manuscripts

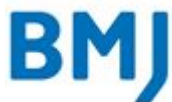

I, the Submitting Author has the right to grant and does grant on behalf of all authors of the Work (as defined in the below author licence), an exclusive licence and/or a non-exclusive licence for contributions from authors who are: i) UK Crown employees; ii) where BMJ has agreed a CC-BY licence shall apply, and/or iii) in accordance with the terms applicable for US Federal Government officers or employees acting as part of their official duties; on a worldwide, perpetual, irrevocable, royalty-free basis to BMJ Publishing Group Ltd ("BMJ") its licensees and where the relevant Journal is co-owned by BMJ to the co-owners of the Journal, to publish the Work in this journal and any other BMJ products and to exploit all rights, as set out in our [licence](#).

The Submitting Author accepts and understands that any supply made under these terms is made by BMJ to the Submitting Author unless you are acting as an employee on behalf of your employer or a postgraduate student of an affiliated institution which is paying any applicable article publishing charge ("APC") for Open Access articles. Where the Submitting Author wishes to make the Work available on an Open Access basis (and intends to pay the relevant APC), the terms of reuse of such Open Access shall be governed by a Creative Commons licence – details of these licences and which [Creative Commons](#) licence will apply to this Work are set out in our licence referred to above.

Other than as permitted in any relevant BMJ Author's Self Archiving Policies, I confirm this Work has not been accepted for publication elsewhere, is not being considered for publication elsewhere and does not duplicate material already published. I confirm all authors consent to publication of this Work and authorise the granting of this licence.

## Variation in preoperative stress testing by patient, physician, and surgical type – a cohort study

Matthew A Pappas, MD, MPH,<sup>1,2,3</sup> Daniel I Sessler, MD,<sup>3,4</sup> Andrew D Auerbach, MD, MPH,<sup>5</sup> Michael W Kattan, PhD,<sup>6</sup> Alex Milinovich, BA,<sup>6</sup> Eugene H Blackstone, MD,<sup>7</sup> and Michael B Rothberg, MD, MPH<sup>1</sup>

- 1: Center for Value-based Care Research, Cleveland Clinic, Cleveland, OH
- 2: Department of Hospital Medicine, Cleveland Clinic, Cleveland, OH
- 3: Department of **OUTCOMES RESEARCH**, Anesthesiology Institute, Cleveland Clinic, Cleveland, OH
- 4: **OUTCOMES RESEARCH** Consortium, Cleveland, OH
- 5: Department of Hospital Medicine, University of California, San Francisco, San Francisco, CA
- 6: Department of Quantitative Health Sciences, Lerner Research Institute, Cleveland Clinic, Cleveland, OH
- 7: Miller Family Heart and Vascular Institute, Cleveland Clinic, Cleveland, OH

Correspondence to Matthew A Pappas: pappasm@ccf.org; 216.444.9565; 9500 Euclid Ave., Mail Stop G-10, Cleveland, OH 44195

Short title/running head: Variation in preoperative stress testing  
 Word count: 3,644  
 Abstract word count: 292  
 Number of references: 39  
 Number of tables: 3  
 Number of figures: 2  
 Number of appendices: 1

Financial support: This work was supported by the National Heart, Lung, and Blood Institute (NHLBI 1Ko8HL141598).

Competing Interests: None

Keywords (MEDLINE): Perioperative care  
 Preoperative care  
 Risk assessment  
 Elective surgical procedures  
 Cohort studies  
 Exercise test  
 Tomography, Emission-Computed, Single-Photon  
 Echocardiography, Stress

**Abstract****Objectives:**

To describe variation in and drivers of contemporary preoperative cardiac stress testing.

**Setting:**

A dedicated preoperative risk assessment and optimization clinic at a large integrated medical center from 2008 through 2018.

**Participants:**

A cohort of 118,552 adult patients seen by 104 physicians across 159,795 visits to a preoperative risk assessment and optimization clinic.

**Main Outcome:**

Referral for stress testing before major surgery, including nuclear, echocardiographic, or electrocardiographic-only stress testing, within 30 days after a clinic visit.

**Results:**

A total of 8,303 visits (5.2%) resulted in referral for preoperative stress testing. Key patient factors associated with preoperative stress testing included predicted surgical risk, patient functional status, a previous diagnosis of ischemic heart disease, tobacco use, and body mass index. Patients living in either the most- or least-deprived census block groups were more likely to be tested. Patients were tested more frequently before aortic, peripheral vascular, or urologic interventions than before other surgical subcategories. Even after fully adjusting for patient and surgical factors, provider effects remained important: marginal testing rates differed by a factor-of-three in relative terms and around 2.5% in

1  
2  
3 absolute terms between the 5<sup>th</sup> and 95<sup>th</sup> percentile physicians. Stress testing frequency  
4  
5 decreased over the time period; controlling for patient and physician predictors, a visit in  
6  
7 2008 would have resulted in stress testing approximately 3.5% of the time, while a visit in  
8  
9 2018 would have resulted in stress testing approximately 1.3% of the time.  
10  
11

### 12 **Conclusions:**

13  
14  
15 In this large cohort of patients seen for preoperative risk assessment at a single health  
16  
17 system, decisions to refer patients for preoperative stress testing are influenced by various  
18  
19 factors other than estimated perioperative risk and functional status, the key  
20  
21 considerations in current guidelines. The frequency of preoperative stress testing has  
22  
23 decreased over time, but remains highly provider-dependent.  
24  
25  
26  
27  
28  
29  
30  
31  
32  
33  
34  
35  
36  
37  
38  
39  
40  
41  
42  
43  
44  
45  
46  
47  
48  
49  
50  
51  
52  
53  
54



**Strengths and limitations of this study:**

- We identified a large cohort of patients considering noncardiac surgery, with detailed clinical data from each visit.
- We tested predictor variables across various constructs potentially related to preoperative stress testing.
- We accounted for clustering by physician and patient, testing different structures in an effort to optimally partition variance.
- We used multiple imputation by chained equations to mitigate potential biases from missing data.

**Glossary of Abbreviations:**

ACC/AHA: American College of Cardiology/American Heart Association

ASA: American Society of Anesthesiologists

CAD: coronary artery disease

METs: Estimated metabolic equivalents

MICA: Myocardial infarction or cardiac arrest calculator

RCRI: Revised cardiac risk index

## Introduction

The 2014 American College of Cardiology/American Heart Association (ACC/AHA) guidelines recommend preoperative stress testing for patients whose predicted risk of a major adverse cardiac event exceeds 1% and whose functional status is poor or unknown, when results from stress testing would change clinical management.<sup>1</sup>

However, clinicians use various risk prediction tools, which identify different patients as having elevated risk.<sup>2,3</sup> Additionally, multiple methods of assessing functional status are used, which again can lead to variation in patients selected for stress testing.<sup>2,4-7</sup> Thus, the final decision to proceed with stress testing can become something closer to a provider-level judgment than a guideline-driven protocol.<sup>8</sup> Variation in use of stress testing can have substantial cost implications and potentially prompt subsequent tests and procedures with little clinical benefit.<sup>9</sup>

To understand contemporary use and drivers of preoperative cardiac stress testing, we sought to describe variation and predictors of preoperative stress testing using rich clinical data from a large integrated health system.

## Methods

The Internal Medicine Preoperative Assessment, Consultation and Treatment (IMPACT) Center assesses patients prior to noncardiac surgery at the Cleveland Clinic. In the years

1  
2  
3 from 2008 through 2018, 118,552 patients were seen in our clinic by 104 physicians across  
4  
5 159,795 visits. Among this cohort, we identified scheduled and completed preoperative  
6  
7 cardiac stress tests, here defined as those within the 30 days after a clinic visit and before  
8  
9 noncardiac surgery. This study was approved by the Cleveland Clinic Institutional Review  
10  
11 Board (IRB #18-1076).  
12  
13  
14  
15

16  
17 Natural language processing was performed in python (version 3.7.8) using regular  
18  
19 expressions and the spacy.io library (version 2.3.2). All analyses were performed in Stata  
20  
21 (version 14; College Station, TX). Data used are from our electronic health record and are  
22  
23 not available for outside access.  
24  
25  
26  
27  
28  
29

### 30 *Predictor variables*

31  
32 We theorized that six underlying constructs would be related to stress test ordering:  
33  
34 predicted perioperative risk, functional status, social and financial support, medical  
35  
36 comorbidities, physician tendencies and experience, and time. We created a random  
37  
38 effects logit model for each construct to refine variables included in our final model.  
39  
40 Within each submodel, we pruned variables according to Bayesian information criteria  
41  
42 (BIC). For continuous variables, we assessed for nonlinear or categorical relationships  
43  
44 using visual examination of binned scatter plots. To avoid overfitting, we limited  
45  
46 candidate predictors to fewer than 1 predictor variable per 15 preoperative stress tests,  
47  
48 including tested interactions, nonlinear effects, and discarded predictors. We estimated  
49  
50  
51  
52  
53  
54

55  
56  
57  
58  
59  
60  
6

1  
2  
3 that we had approximately 539 degrees of freedom for analysis, with fewer for cluster-  
4  
5 level variables depending on model structure (described below).  
6  
7

8  
9  
10 For measures of perioperative risk, we tested Revised Cardiac Risk Index (RCRI),  
11  
12 Myocardial Infarction or Cardiac Arrest (MICA), and MICA's categorization of surgeries  
13  
14 using a previously-published crosswalk.<sup>2,10,11</sup> (Although different procedures likely have  
15  
16 different intrinsic cardiac risk, we used the MICA categorization of surgeries to avoid  
17  
18 overfitting.<sup>11,12</sup>) Upon finding that few surgical categories were associated with different  
19  
20 stress testing rates, we replaced that multinomial variable with indicator variables for  
21  
22 each category associated with different testing rates in our data (aortic, peripheral  
23  
24 vascular, and urologic surgeries). As a separate sensitivity analysis, we excluded patients  
25  
26 seen in advance of cardiac or vascular surgery, who are generally evaluated elsewhere in  
27  
28 our institution. We tested both documented and calculated RCRI, which may differ for a  
29  
30 variety of reasons including lab results between the clinic visit and documentation,  
31  
32 erroneous diagnoses/chart lore, outside records unavailable in the electronic medical  
33  
34 record, and misconceptions about how RCRI is calculated. We treated both estimates of  
35  
36 RCRI as continuous to force a monotonic relationship (no theory would support lower  
37  
38 testing rates at higher predicted cardiac risk). We tested MICA-predicted probability both  
39  
40 as a continuous variable and dichotomized at 1%. Although we used the American Society  
41  
42 of Anesthesiologists (ASA) physical status to calculate MICA, we did not test that  
43  
44 separately because it is assigned at the time of surgery.  
45  
46  
47  
48  
49  
50  
51  
52  
53  
54  
55  
56  
57  
58  
59  
60

7

1  
2  
3  
4  
5  
6 For measures of functional status, we tested estimated metabolic equivalents (METs),  
7  
8 which in this clinic is based on a semi-quantitative questionnaire, and the physician's  
9  
10 subjective global assessment of function, which is comparable to the Eastern Cooperative  
11  
12 Oncology Group (ECOG) score.<sup>13</sup> For measures of social and financial support, we tested  
13  
14 area deprivation index (a measure of socioeconomic disadvantage based on education,  
15  
16 employment, housing quality, and poverty measures by census block group), race,  
17  
18 ethnicity, marital status, and age (here dichotomized at age 65 to reflect changes in access  
19  
20 to care with universal Medicare eligibility).<sup>14</sup> For measures of medical comorbidities and  
21  
22 illness, we considered age, vital signs at the clinic visit, diagnoses of coronary artery  
23  
24 disease, cerebrovascular disease, or congestive heart failure, diabetes, use of insulin,  
25  
26 creatinine, tobacco use, and predicted probability of obstructive coronary artery disease.<sup>15</sup>  
27  
28  
29  
30  
31  
32  
33  
34

35 To accurately capture the predicted probability of obstructive coronary artery disease  
36  
37 among patients without an existing diagnosis, we applied natural language processing to  
38  
39 extract three pain characteristics from the full-text clinic note, when patients were  
40  
41 documented to have chest pain: (1) substernal, (2) provoked by exertion, and (3) relieved  
42  
43 by either rest or nitroglycerin. Notes with all three chest pain criteria were considered to  
44  
45 document "typical" chest pain, notes with two criteria were considered to document  
46  
47 "atypical" chest pain, and other documentation of chest pain was considered to represent  
48  
49 non-specific chest pain.<sup>15</sup> For visits without documented chest pain, we estimated pretest  
50  
51  
52  
53  
54

55  
56  
57  
58  
59  
60  
8

1  
2  
3 probability as though patients had non-specific chest pain. We used an interaction with  
4  
5 our variable for a previous diagnosis of coronary artery disease, such that this estimated  
6  
7 probability was considered a predictor only when patients did not have an existing  
8  
9 diagnosis.  
10  
11  
12  
13  
14

15 For measures of physician tendencies and experience, we tested (on the date of each visit)  
16  
17 years of post-residency practice (a proxy for overall experience) and the number of  
18  
19 previous encounters the physician had completed in our dataset (a proxy for experience  
20  
21 in preoperative risk assessment more specifically). For measures of time, we theorized  
22  
23 that patients who had previous cardiac stress tests would be less likely to be referred for  
24  
25 preoperative stress testing, and that physicians would give greater weight to more recent  
26  
27 tests (i.e., the relationship would be time-dependent). We used the date of the visit as a  
28  
29 continuous variable to test for changing stress test rates over time. To assess for changes  
30  
31 related to publication of the current ACC/AHA guideline, we created a dichotomous  
32  
33 variable for whether the visit occurred before or after said guideline's December 9, 2014  
34  
35 publication, and tested for interactions between that term and other predictors.<sup>1</sup>  
36  
37  
38  
39  
40  
41  
42  
43  
44

45 Because unstable angina would be a potential indication for cardiac testing regardless of  
46  
47 upcoming surgery, we investigated the frequency of angina in a subset of notes between  
48  
49 June 2013 and July 2016; an EHR template used during this period included a structured  
50  
51 questionnaire of symptoms. One such symptom was "Angina within 30 days".  
52  
53  
54

55  
56  
57  
58  
59  
60  
9

### *Model structure*

Conceptually, visits could be thought of as clustered by patient (with physician-level variables at the level of the visit) or by physician (with patient-level variables at the level of the visit). We tested different structures using empty models and calculated intraclass correlation coefficients to estimate the proportion of variance explained by unmeasured patient-level or physician-level factors.

With visits clustered by physician, approximately 0.4% of variance in stress test ordering was at the level of the physician. When we clustered visits by patient, approximately 4.9% of variance in stress test ordering was at the level of the patient. We therefore developed our model using physician- and visit-level variables clustered by patient, including physician ID as a visit-level indicator (“dummy”) variable. This approach drops some low volume providers for whom outcomes are overfitted but should capture more unmeasured variance at both the patient and provider levels.

### *Multivariable modeling*

Finally, we added the remaining predictor variables from each submodel into a multivariable logistic regression model. We again pruned predictors based on BIC and examined for nonlinear or categorical relationships. We revisited our model structure using the final predictor variables, comparing models clustered by patient or physician

1  
2  
3 based on BIC.  
4  
5  
6  
7

8 Because results of a multilevel logistic regression with interaction terms have limited  
9 intuitive meaning, we calculated marginal effects for reporting. Holding all other  
10 variables at their medians, we estimated the effect of changing one predictor variable at a  
11 time.  
12  
13  
14  
15  
16  
17  
18  
19

### 20 *Data extraction and missingness*

21  
22 Our methods for extracting data from the electronic medical record have been described  
23 previously.<sup>16</sup> We considered patients as having each considered diagnosis if it had been  
24 documented at any time before or at the analyzed visit. For creatinine and other lab  
25 testing, we used the most recent measurement up to and including the day of the clinic  
26 visit. We used multiple imputation by chained equations to address missing data and  
27 previously described standards to ensure multiple imputation did not introduce Monte  
28 Carlo error.<sup>17</sup> We imputed predictor variables other than those with negligible missing  
29 data: age, sex, vital signs, and binary variables indicating previous diagnoses.  
30  
31  
32  
33  
34  
35  
36  
37  
38  
39  
40  
41  
42  
43  
44

### 45 *Patient and Public Involvement*

46  
47 Patients were not involved in the design of this study.  
48  
49  
50  
51

## 52 **Results**

53  
54  
55 11  
56  
57  
58  
59  
60



1  
2  
3 Overall, 5.2% of visits to the preoperative clinic led to a cancelled or completed  
4 preoperative stress test (8,303/159,795), with 5.1% (8,085; 97.4% of those referred)  
5  
6 completing the test. Patient demographics, selected risk factors, and proportions of  
7  
8 missing data are shown in Tables 1 and 2. Unadjusted physician referral rates are shown in  
9  
10  
11  
12  
13 Figure 1.

14  
15  
16  
17  
18 Marginal testing rates across each predictor variable, with other variables at their  
19  
20 respective medians, are shown in Table 3. In general, patients were more likely to be  
21  
22 referred for preoperative stress testing as estimated perioperative risk increased and for  
23  
24 specific categories of surgeries (aortic, peripheral vascular, and urologic). Of those,  
25  
26 patients undergoing aortic surgery were most likely to be referred for stress testing,  
27  
28 though our dataset included relatively few aortic surgeries and confidence intervals for  
29  
30 that predictor were wide. Even after adjusting for all other factors, different providers  
31  
32 were more likely to refer for preoperative stress testing than others: a visit to the 95<sup>th</sup>  
33  
34 percentile physician in this clinic would result in stress testing 3.8% of the time, while a  
35  
36 visit to the 5<sup>th</sup> percentile physician in this clinic would result in testing around 1.2% of the  
37  
38  
39  
40  
41  
42  
43  
44  
45  
46  
47  
48  
49  
50  
51  
52  
53  
54  
55  
56  
57  
58  
59  
60  
time.

51  
52  
53  
54  
55  
56  
57  
58  
59  
60  
Other important patient variables included the physician's subjective assessment of  
global patient function, METs, socioeconomic advantage or disadvantage compared to  
the median, BMI, diastolic blood pressure, existing diagnoses of ischemic heart disease or

1  
2  
3 congestive heart failure, estimated probability of obstructive coronary artery disease, and  
4 tobacco use. Visits later in our dataset were less likely to result in a preoperative stress  
5 test compared with earlier visits. Each of these variables, while significant, appeared to  
6 exert less influence than surgical categories, estimated surgical risk, and provider. Fully  
7 adjusted provider marginal rates are shown in Figure 2.  
8  
9  
10  
11  
12  
13  
14  
15  
16  
17

18 Results were very similar for models clustered by patient or physician. Information  
19 criteria would slightly favor a model clustered by physician (BIC: 51040) compared to a  
20 model clustered by patient with a physician indicator variable (BIC: 52009). Meanwhile,  
21 the model clustered by physician had a slightly lower  $R^2$  (0.1896) compared with a model  
22 clustered by patient with physician as an indicator variable (0.1907).  
23  
24  
25  
26  
27  
28  
29  
30  
31

32 Between June 2013 and July 2016, 23,034 visits used our EHR template that included  
33 structured entry of “Angina within 30 days”. Of those, 48 (0.2%) were marked as “Yes”. Of  
34 107 other visits flagged by natural language processing as potentially including unstable  
35 angina, manual chart review of a random sample of 50 visits showed 3 negations missed  
36 by natural language processing, 32 descriptions of historical symptoms that had prompted  
37 testing or intervention previously, 2 quotations of test reports (coronary catheterization  
38 reports that included unstable angina as the indication for testing), and 13 cases of  
39 unstable angina.  
40  
41  
42  
43  
44  
45  
46  
47  
48  
49  
50  
51  
52  
53  
54

## Discussion

In this cohort of patients seen for preoperative risk assessment at a single health system, we have identified key drivers of preoperative stress testing, which include type of surgery, estimated surgical risk, and patient functional status. Our results demonstrate use of preoperative stress testing in a real-world cohort.

Current guidelines recommend preoperative stress testing for patients whose predicted perioperative adverse cardiac event risk exceeds 1% and whose functional capacity is poor or unknown, when such testing would change clinical management. Although we cannot determine from these data whether physicians thought testing would change management, and predicted surgical risk scores have poor concordance across the 1% threshold, patients able to perform four or more metabolic equivalents of activity made up nearly one-third of all stress test referrals.<sup>2,10,18</sup> Our data suggest that a substantial fraction of preoperative stress tests were inconsistent with current guidance.

Predicted surgical risk was nonetheless a key driver of preoperative stress testing. Testing rates increased with increasing RCRI, without a clear dichotomization at any particular value of RCRI. And interestingly, although MICA was essentially never documented, a MICA-predicted surgical risk of greater than 1% appears to be a better single predictor variable than RCRI. Physicians could be trying to incorporate the guideline-recommended threshold into their decision-making while relying on cohorts with

1  
2  
3 different calibration, or could be deliberately avoiding a stark dichotomization of risk at  
4  
5 1%.<sup>10,18</sup>  
6  
7  
8  
9

10 As with predicted surgical risk, physicians appeared to consider functional status as  
11 something between the dichotomy of current guidance and continuum of risk  
12 encountered in clinical practice. Testing rates were higher among less functional patients  
13 and lower among patients able to achieve higher METs, but neither were especially  
14 important predictors in our model. It seems probable that both clinical skill and clinical  
15 decision-making are more nuanced than we can discern from our data source. For  
16 example, physicians likely vary in both their ability to elicit anginal equivalents and their  
17 interpretation of potentially ambiguous symptoms. And even if they were presented with  
18 equivalent information, various physicians might reasonably make different decisions  
19 about testing based on factors we are not able to investigate. For example, physicians  
20 could reasonably be more inclined to test before a pancreaticoduodenectomy than a  
21 laparoscopic cholecystectomy in view of those procedures' very different metabolic  
22 demands, but we lack sufficient power to test individual surgical procedures without  
23 overfitting.<sup>12</sup> In any case, functional status and patient variables other than predicted  
24 perioperative risk explained little variance in testing rates.  
25  
26  
27  
28  
29  
30  
31  
32  
33  
34  
35  
36  
37  
38  
39  
40  
41  
42  
43  
44  
45  
46  
47  
48  
49

50 Surgical category also offers insights into testing rationale. Patients were tested more  
51 frequently before aortic or peripheral vascular interventions, perhaps reflecting persistent  
52  
53  
54

55 15  
56  
57  
58  
59  
60

1  
2  
3 beliefs that patients with coronary artery disease should be identified and revascularized  
4 before vascular surgery.<sup>19-21</sup> However, patients undergoing vascular surgery are generally  
5 evaluated elsewhere at our institution, leaving our sample small and confidence intervals  
6 wide. We also note that patients are more likely to be referred for stress testing before  
7 urologic surgery, after controlling for patient risk factors and despite the fact that  
8 urologic procedures are not associated with higher intrinsic cardiac risk than other  
9 common surgical categories. Anecdotally, physicians practicing in this clinic have  
10 reported that a number of urologists at our institution are reluctant to operate on high-  
11 risk patients unless those patients first undergo preoperative testing. While investigating  
12 such a hypothesis would require a different approach than ours, clearly every physician in  
13 a preoperative clinic functions within a larger system of care and must build consensus  
14 among a team of treating physicians.

15  
16  
17  
18  
19  
20  
21  
22  
23  
24  
25  
26  
27  
28  
29  
30  
31  
32  
33  
34  
35 Other significant predictor variables include tobacco use, BMI, diastolic blood pressure,  
36 ischemic heart disease, and a patient's census block group. Because each of these are  
37 correlated with risk of obstructive coronary artery disease, one possibility is that data  
38 unavailable to us (such as outside records) led to some portion of the preoperative stress  
39 testing we observed. Although that remains possible, multiple observations argue against  
40 a simple explanation that these variables are proxies for coronary disease risk. First,  
41 higher probability of obstructive coronary artery disease, calculated based on available  
42 data, was associated with lower likelihood of preoperative testing. Second, patients  
43  
44  
45  
46  
47  
48  
49  
50  
51  
52  
53

1  
2  
3 residing in the wealthiest and poorest census tracts were approximately as likely to be  
4 referred for stress testing, with patients in the middle of the socioeconomic range less  
5 likely. Finally, diabetes was not associated with testing. It would seem that either  
6 physicians in our dataset did not incorporate patients' pretest probability of obstructive  
7 coronary disease in their decision to refer for testing, or that their assessments were  
8 poorly calibrated.  
9

10 Angina or its equivalents do not appear to be a frequent rationale for testing in this  
11 cohort. Around 0.2% of notes that used a templated review of pertinent symptoms noted  
12 angina within 30 days, parsing of free text notes did not identify unstable angina with  
13 appreciable frequency, and many cases identified through natural language processing  
14 appeared not to be unstable angina on manual chart review of sampled visits. Although  
15 this could represent a failure to document findings that were present during the visit, it  
16 would seem more likely that a preoperative visit before elective noncardiac surgery is an  
17 inefficient tool to screen for angina.  
18  
19

20 The frequency of stress testing declined over time in our dataset, in contrast with  
21 increasing testing rates suggested in other contexts.<sup>22,23</sup> A recent cross-sectional analysis  
22 of claims data from patients who had total hip or knee arthroplasty also identified  
23 decreasing testing frequency over a similar period.<sup>24</sup> Our cohort study begins with a visit  
24 to a preoperative risk assessment clinic, incorporates detailed clinical data, and is not  
25  
26  
27  
28  
29  
30  
31  
32  
33  
34  
35  
36  
37  
38  
39  
40  
41  
42  
43  
44  
45  
46  
47  
48  
49  
50  
51  
52  
53  
54

1  
2  
3 limited to patients who have completed orthopedic surgery. Our analysis thus extends  
4  
5 previous understanding by showing that the reduction is not limited to orthopedic  
6  
7 procedures, not a result of selecting patients not referred for stress testing for elective  
8  
9 surgery, and not consequent to lower predicted cardiac risk. Taken together, these two  
10  
11 analyses with different limitations suggest a shift in practice away from preoperative  
12  
13 cardiac stress testing. Neither analysis suggests a clear change in testing frequency after  
14  
15 the release of current guidelines. Although there can certainly be time lags between  
16  
17 publication and consequent practice change, our findings argue against a causal  
18  
19 relationship between publication of the current guideline and near-term changes in  
20  
21 testing rates.<sup>25</sup>  
22  
23  
24  
25  
26  
27  
28  
29

30 Our model demonstrates physician practice variation: with all other predictors held at  
31  
32 their medians, the 95<sup>th</sup> percentile physician was around three times more likely to order  
33  
34 preoperative stress testing than the 5<sup>th</sup> percentile physician. But we caution against using  
35  
36 our results, or others, for profiling individual providers, which is generally a low-  
37  
38 reliability exercise and prone to gaming.<sup>26</sup> Our dataset is among the largest clinical  
39  
40 datasets of preoperative risk assessment, but true outliers are rare and most physicians  
41  
42 are not detectably different from the mean after adjustment (see Figure 2). As with other  
43  
44 observations of physician practice variation, ours suggests a deeper failure: that we do not  
45  
46 yet understand how best to use preoperative stress testing to mitigate perioperative  
47  
48 cardiac risk.<sup>27</sup>  
49  
50  
51  
52  
53  
54

1  
2  
3  
4  
5  
6 Surgery carries inherent cardiac risk, and stress testing may reflect physician discomfort  
7  
8 with the malpractice or cognitive liabilities that cardiac risk entails.<sup>28-32</sup> Stress testing can  
9  
10 inform diagnosis and prognosis, but outcomes will only improve if testing results in  
11  
12 interventions that reduce perioperative risk. Such interventions have proven elusive:  
13  
14 preoperative revascularization did not reduce cardiac risk in the largest randomized trial  
15  
16 to date, beta blockers are more likely harmful than helpful, and other interventions (e.g.,  
17  
18 statins) that may be allocated differently based on stress testing likely have modest  
19  
20 effects, if any.<sup>33-36</sup> Intraoperative care or postoperative testing patterns could differ based  
21  
22 on whether a preoperative stress test was performed, but what practices in those settings  
23  
24 might reduce the risk of major adverse cardiac events remain equally unclear. While  
25  
26 estimated perioperative cardiac risk appears to drive stress testing, it remains to be seen  
27  
28 how stress testing might reduce perioperative cardiac risk.  
29  
30  
31  
32  
33  
34  
35  
36

37 Although we have made every effort to ensure the internal validity of our data, analysis,  
38  
39 and results, our data may not adequately represent drivers of or variation in preoperative  
40  
41 stress testing before some common types of surgery, including ophthalmologic surgery,  
42  
43 which is evaluated elsewhere in our institution.<sup>37</sup> Our IMPACT clinic has made  
44  
45 substantial efforts to provide uniform care, which could have reduced physician variation  
46  
47 in our dataset, and we cannot analyze variation across health system or region, which can  
48  
49 also be substantial.<sup>38</sup> As with any single-center study, results should be extrapolated to  
50  
51  
52  
53  
54



1  
2  
3 other settings with caution. For example, we observed higher testing frequency before  
4 urologic surgery than would be expected for cardiac risk; other centers may have different  
5 surgical categories with testing out of proportion to surgical risk. The need to build a  
6 consensus plan of care among a treatment team is true across institutions, but the  
7 particulars of our institution's consensus may not be.  
8  
9  
10  
11  
12  
13  
14  
15  
16  
17

18 Additionally, as with other observational studies, our analytical choices are difficult to  
19 separate from our theoretical framework, and may influence our results in various ways.<sup>39</sup>  
20 For example, we rejected physician experience as a predictor of testing in favor of a  
21 random effect for each physician and the date of each visit due to our prespecified  
22 analytic criteria (rejecting predictor variables that worsened AIC and BIC). Still,  
23 experience differs by physician and necessarily accrues over time. A reasonable  
24 investigator with a different theoretical model could assume broadly stable testing rates  
25 over time and conclude that testing decreases as physicians gain experience (see  
26 Supplemental Appendix). Time in particular is rife with potential confounders of this sort.  
27 Recent work using other datasets also identified reduced stress testing over time  
28 (described above), offering reassurance that our analytic criteria led to the best  
29 conclusion. Still, the effect of experience on appropriate testing could be an avenue for  
30 further investigation.  
31  
32  
33  
34  
35  
36  
37  
38  
39  
40  
41  
42  
43  
44  
45  
46  
47  
48  
49  
50  
51

52 But while the limitations of our study reflect the limitations of any single center  
53  
54

1  
2  
3 observational study, the detailed clinical data available to us offers distinct advantages  
4  
5 over earlier work. We have demonstrated real-world use of preoperative stress testing  
6  
7 before a wide range of possible surgical interventions, using visit-level data to  
8  
9 comprehensively assess variation in and predictors of preoperative cardiac stress testing.  
10  
11  
12  
13  
14

15 In summary, the frequency of preoperative stress testing varied with estimated surgical  
16  
17 risk, patient functional status, socioeconomic status, ischemic heart disease, congestive  
18  
19 heart failure, body mass index, diastolic blood pressure, surgical category, and provider.  
20  
21 The fraction of patients referred for stress testing appears to be declining over time, but  
22  
23 testing remains common and highly dependent on the provider. The value of  
24  
25 preoperative stress testing remains to be established.  
26  
27  
28  
29  
30  
31  
32  
33  
34  
35  
36  
37  
38  
39  
40  
41  
42  
43  
44  
45  
46  
47  
48  
49  
50  
51  
52  
53  
54

**Funding Sources:**

This work was funded by NHLBI 1Ko8HL141598.

**Conflict of Interest Disclosures:**

None

**Author Contributions:**

Dr. Pappas: This author conceived the study, collected the data, performed the analysis, and wrote the initial draft of the manuscript.

Dr. Sessler: This author helped improve the analysis and revised the manuscript.

Dr. Auerbach: This author helped improve the analysis and revised the manuscript.

Dr. Kattan: This author helped improve the analysis and revised the manuscript.

Mr. Milinovich: This author helped obtain and validate data.

Dr. Blackstone: This author helped improve the analysis and revised the manuscript.

Dr. Rothberg: This author helped improve the analysis and revised the manuscript.

**Ethical Approval:**

This study was approved by the Cleveland Clinic Institutional Review Board (IRB #18-1076).

**Data Availability Statement**

Data used are from our electronic health record and are not available for outside access.

## References

1. Fleisher LA, Fleischmann KE, Auerbach AD, et al. 2014 ACC/AHA guideline on perioperative cardiovascular evaluation and management of patients undergoing noncardiac surgery: executive summary: a report of the American College of Cardiology/American Heart Association Task Force on Practice Guidelines. *Circulation*. 2014;130(24):2215-2245. doi:10.1161/CIR.000000000000105
2. Pappas MA, Sessler DI, Rothberg MB. Anticipated Rates and Costs of Guideline-Concordant Preoperative Stress Testing. *Anesth Analg*. 2019;128(2):241-246. doi:10.1213/ANE.0000000000003754
3. Glance LG, Faden E, Dutton RP, et al. Impact of the choice of risk model for identifying low-risk patients using the 2014 American college of cardiology/American Heart Association perioperative guidelines. *Anesthesiology*. 2018;129(5):889-900. doi:10.1097/ALN.0000000000002341
4. Hlatky MA, Boineau RE, Higginbotham MB, et al. A brief self-administered questionnaire to determine functional capacity (The Duke Activity Status Index). *Am J Cardiol*. 1989;64(10):651-654. doi:10.1016/0002-9149(89)90496-7
5. Reilly DF, McNeely MJ, Doerner D, et al. Self-reported exercise tolerance and the risk of serious perioperative complications. *Arch Intern Med*. 1999;159(18):2185-2192. doi:10.1001/archinte.159.18.2185
6. Melon CC, Eshtiaghi P, Luksun WJ, Wijesundera DN. Validated questionnaire vs physicians' judgment to estimate preoperative exercise capacity. *JAMA Intern Med*.

- 2014;174(9):1507-1508. doi:10.1001/jamainternmed.2014.2914
7. Wijesundera DN, Pearse RM, Shulman MA, et al. Assessment of functional capacity before major non-cardiac surgery: an international, prospective cohort study. *Lancet*. 2018;391(10140):2631-2640. doi:10.1016/S0140-6736(18)31131-0
8. Eddy DM. Variations in physician practice: The role of uncertainty. *Health Aff*. 1984;3(2):74-89. doi:10.1377/hlthaff.3.2.74
9. Mark DB, Federspiel JJ, Cowper PA, et al. Economic Outcomes With Anatomical Versus Functional Diagnostic Testing for Coronary Artery Disease. *Ann Intern Med*. 2016;165(2):94-102. doi:10.7326/M15-2639
10. Lee TH, Marcantonio ER, Mangione CM, et al. Derivation and prospective validation of a simple index for prediction of cardiac risk of major noncardiac surgery. *Circulation*. 1999;100(10):1043-1049. doi:10.1161/01.CIR.100.10.1043
11. Gupta PK, Gupta H, Sundaram A, et al. Development and validation of a risk calculator for prediction of cardiac risk after surgery. *Circulation*. 2011;124(4):381-387. doi:10.1161/CIRCULATIONAHA.110.015701
12. Liu JB, Liu Y, Cohen ME, Ko CY, Sweitzer BJ. Defining the Intrinsic Cardiac Risks of Operations to Improve Preoperative Cardiac Risk Assessments. *Anesthesiology*. 2018;128(2):283-292. doi:10.1097/ALN.0000000000002024
13. Oken MM, Creech RH, Davis TE. Toxicology and response criteria of the Eastern Cooperative Oncology Group. *Am J Clin Oncol*. 1982;5(6):649-655. doi:10.1097/00000421-198212000-00014

- 1  
2  
3 14. Kind AJH, Buckingham WR. Making neighborhood-disadvantage metrics accessible  
4  
5 - The neighborhood atlas. *N Engl J Med*. 2018;378(26):2456-2458.  
6  
7  
8 doi:10.1056/NEJMp1802313  
9
- 10 15. Genders TSS, Steyerberg EW, Hunink MGM, et al. Prediction model to estimate  
11  
12 presence of coronary artery disease: Retrospective pooled analysis of existing  
13  
14 cohorts. *BMJ*. 2012;344(7862). doi:10.1136/bmj.e3485  
15  
16  
17
- 18 16. Milinovich A, Kattan MW. Extracting and utilizing electronic health data from Epic  
19  
20 for research. *Ann Transl Med*. 2018;6(3):42-42. doi:10.21037/atm.2018.01.13  
21  
22
- 23 17. White IR, Royston P, Wood AM. Multiple imputation using chained equations:  
24  
25 Issues and guidance for practice. *Stat Med*. 2011;30(4):377-399. doi:10.1002/sim.4067  
26  
27
- 28 18. Duceppe E, Parlow J, MacDonald P, et al. Canadian Cardiovascular Society  
29  
30 Guidelines on Perioperative Cardiac Risk Assessment and Management for Patients  
31  
32 Who Undergo Noncardiac Surgery. *Can J Cardiol*. 2017;33(1):17-32.  
33  
34  
35 doi:10.1016/j.cjca.2016.09.008  
36
- 37 19. Eagle KA, Singer DE, Brewster DC, Darling RC, Mulley AG, Boucher CA.  
38  
39 Dipyridamole-thallium scanning in patients undergoing vascular surgery.  
40  
41 Optimizing preoperative evaluation of cardiac risk. *JAMA*. 1987;257(16):2185-2189.  
42  
43  
44  
45 <http://www.ncbi.nlm.nih.gov/pubmed/3560400>. Accessed November 11, 2019.  
46
- 47 20. Hertzner NR, Beven EG, Young JR, et al. Coronary artery disease in peripheral  
48  
49 vascular patients. A classification of 1000 coronary angiograms and results of  
50  
51 surgical management. *Ann Surg*. 1984;199(2):223-233. doi:10.1097/00000658-

25

- 1  
2  
3 198402000-00016  
4  
5  
6 21. Boucher CA, Brewster DC, Darling RC, Okada RD, Strauss HW, Pohost GM.  
7  
8 Determination of Cardiac Risk by Dipyridamole-Thallium Imaging before  
9  
10 Peripheral Vascular Surgery. *N Engl J Med*. 1985;312(7):389-394.  
11  
12  
13 doi:10.1056/NEJM198502143120701  
14  
15 22. Sheffield KM, McAdams PS, Benarroch-Gampel J, et al. Overuse of preoperative  
16  
17 cardiac stress testing in medicare patients undergoing elective noncardiac surgery.  
18  
19  
20 *Ann Surg*. 2013;257(1):73-80. doi:10.1097/SLA.0b013e31826bc2f4  
21  
22  
23 23. Sigmund AE, Stevens ER, Blitz JD, Ladapo JA. Use of preoperative testing and  
24  
25 physicians' response to professional society guidance. *JAMA Intern Med*.  
26  
27  
28 2015;175(8):1352-1359. doi:10.1001/jamainternmed.2015.2081  
29  
30 24. Rubin DS, Hughey R, Gerlach RM, Ham SA, Ward RP, Nagele P. Frequency and  
31  
32 Outcomes of Preoperative Stress Testing in Total Hip and Knee Arthroplasty from  
33  
34 2004 to 2017. *JAMA Cardiol*. 2021;6(1):13-20. doi:10.1001/jamacardio.2020.4311  
35  
36  
37 25. Institute of Medicine. *Crossing the Quality Chasm: A New Health System for the 21st*  
38  
39  
40 *Century*. Washington, DC: The National Academies Press; 2001. doi:10.17226/10027  
41  
42 26. Hofer TP, Hayward RA, Greenfield S, Wagner EH, Kaplan SH, Manning WG. The  
43  
44 unreliability of individual physician "report cards" for assessing the costs and  
45  
46 quality of care of a chronic disease. *J Am Med Assoc*. 1999;281(22):2098-2105.  
47  
48  
49 doi:10.1001/jama.281.22.2098  
50  
51  
52 27. Wennberg JE, Freeman JL, Culp WJ. Are Hospital Services Rationed in New Haven  
53  
54

26

- 1  
2  
3 or Over-Utilized in Boston? *Lancet*. 1987;329(8543):1185-1189. doi:10.1016/S0140-  
4  
5 6736(87)92152-0  
6  
7  
8 28. Saint S, Vaughn VM, Chopra V, Fowler KE, Kachalia A. Perception of Resources  
9  
10 Spent on Defensive Medicine and History of Being Sued Among Hospitalists:  
11  
12 Results from a National Survey. *J Hosp Med*. 2018;13(1):26-29. doi:10.12788/jhm.2800  
13  
14  
15 29. Feinstein AR. The 'Chagrin Factor' and Qualitative Decision Analysis. *Arch Intern*  
16  
17 *Med*. 1985;145(7):1257-1259. doi:10.1001/archinte.1985.00360070137023  
18  
19  
20 30. Rolfe A, Burton C. Reassurance after Diagnostic Testing with a Low Pretest  
21  
22 Probability of Serious Disease: Systematic Review and Meta-analysis. *JAMA Intern*  
23  
24 *Med*. 2013;173(6):407-416. doi:10.1001/jamainternmed.2013.2762  
25  
26  
27 31. Van der Weijden T, Van Velsen M, Dinant GJ, Van Hasselt CM, Grol R.  
28  
29 Unexplained complaints in general practice: Prevalence, patients' expectations, and  
30  
31 professionals' test-ordering behavior. *Med Decis Mak*. 2003;23(3):226-231.  
32  
33 doi:10.1177/0272989X03023003004  
34  
35  
36 32. Little P, Dorward M, Warner G, Stephens K, Senior J, Moore M. Importance of  
37  
38 patient pressure and perceived pressure and perceived medical need for  
39  
40 investigations, referral, and prescribing in primary care: Nested observational  
41  
42 study. *Br Med J*. 2004;328(7437):444-446. doi:10.1136/bmj.38013.644086.7c  
43  
44  
45 33. McFalls EO, Ward HB, Moritz TE, et al. Coronary-Artery Revascularization before  
46  
47 Elective Major Vascular Surgery. *N Engl J Med*. 2004;351(27):2795-2804.  
48  
49  
50  
51  
52  
53  
54  
55  
56  
57  
58  
59  
60



- 1  
2  
3 34. Blessberger H, Kammler J, Domanovits H, et al. Perioperative beta-blockers for  
4 preventing surgery-related mortality and morbidity. *Cochrane Database Syst Rev*.  
5  
6 March 2018. doi:10.1002/14651858.CD004476.pub3  
7  
8  
9  
10 35. Berwanger O, Manach Y Le, Suzumura EA, et al. Association between pre-operative  
11 statin use and major cardiovascular complications among patients undergoing non-  
12 cardiac surgery: The VISION study. *Eur Heart J*. 2016;37(2):177-185.  
13  
14 doi:10.1093/eurheartj/ehv456  
15  
16  
17  
18 36. Berwanger O, de Barros e Silva PGM, Barbosa RR, et al. Atorvastatin for high-risk  
19 statin-naïve patients undergoing noncardiac surgery: The Lowering the Risk of  
20 Operative Complications Using Atorvastatin Loading Dose (LOAD) randomized  
21 trial. *Am Heart J*. 2017;184:88-96. doi:10.1016/j.ahj.2016.11.001  
22  
23  
24  
25  
26  
27  
28  
29  
30 37. Kerr EA, Chen J, Sussman JB, Klamerus ML, Nallamotheu BK. Stress Testing Before  
31 Low-Risk Surgery: So Many Recommendations, So Little Overuse. *JAMA Intern*  
32 *Med*. 2015;175(4):645. doi:10.1001/jamainternmed.2014.7877  
33  
34  
35  
36  
37 38. Home - Dartmouth Atlas of Health Care. <https://www.dartmouthatlas.org/>.  
38  
39 Accessed November 11, 2019.  
40  
41  
42 39. Palpacuer C, Hammas K, Duprez R, Laviolle B, Ioannidis JPA, Naudet F. Vibration  
43 of effects from diverse inclusion/exclusion criteria and analytical choices: 9216  
44 different ways to perform an indirect comparison meta-analysis. *BMC Med*.  
45  
46 2019;17(1):174. doi:10.1186/s12916-019-1409-3  
47  
48  
49  
50  
51  
52  
53  
54  
55  
56  
57  
58  
59  
60

1  
2  
3  
4  
5  
6  
7  
8  
9  
10  
11  
12  
13  
14  
15  
16  
17  
18  
19  
20  
21  
22  
23  
24  
25  
26  
27  
28  
29  
30  
31  
32  
33  
34  
35  
36  
37  
38  
39  
40  
41  
42  
43  
44  
45  
46  
47  
48  
49  
50  
51  
52  
53  
54  
55  
56  
57  
58  
59  
60

For peer review only

Table 1. Patient and Surgical Characteristics.

|                                                       |             | Total   | Percent of category | Percent of all visits | Completed preoperative stress test | Percent of all preoperative stress tests |
|-------------------------------------------------------|-------------|---------|---------------------|-----------------------|------------------------------------|------------------------------------------|
| <b>Age</b>                                            |             | 159,795 | 100.0%              | 100.0%                | 8,303                              | 100.0%                                   |
| <b>Sex</b>                                            | Female      | 88,738  | 55.5%               | 55.5%                 | 4,079                              | 49.1%                                    |
|                                                       | Male        | 71,055  | 44.5%               | 44.5%                 | 4,224                              | 50.9%                                    |
| <b>Previous diagnosis of ischemic heart disease</b>   | No          | 128,505 | 80.4%               | 80.4%                 | 4,831                              | 58.2%                                    |
|                                                       | Yes         | 31,290  | 19.6%               | 19.6%                 | 3,472                              | 41.8%                                    |
| <b>Previous diagnosis of congestive heart failure</b> | No          | 146,556 | 91.7%               | 91.7%                 | 6,922                              | 83.4%                                    |
|                                                       | Yes         | 13,239  | 8.3%                | 8.3%                  | 1,381                              | 16.6%                                    |
| <b>Previous diagnosis of cerebrovascular disease</b>  | No          | 141,519 | 88.6%               | 88.6%                 | 6,567                              | 79.1%                                    |
|                                                       | Yes         | 18,276  | 11.4%               | 11.4%                 | 1,736                              | 20.9%                                    |
| <b>Systolic Blood Pressure</b>                        |             | 159,488 | 100.0%              | 99.8%                 | 8,285                              | 99.8%                                    |
| <b>Diastolic Blood Pressure</b>                       |             | 159,481 | 100.0%              | 99.8%                 | 8,284                              | 99.8%                                    |
| <b>Body Mass Index</b>                                |             | 157,473 | 100.0%              | 98.5%                 | 8,155                              | 98.2%                                    |
| <b>Creatinine (RCRI categorization)</b>               | ≤ 2.0 mg/dL | 151,885 | 97.1%               | 95.1%                 | 7,695                              | 92.7%                                    |
|                                                       | > 2.0 mg/dL | 4,487   | 2.9%                | 2.8%                  | 542                                | 6.5%                                     |
| <b>Creatinine (MICA categorization)</b>               | ≤ 1.5 mg/dL | 144,369 | 90.3%               | 90.3%                 | 7,128                              | 85.8%                                    |
|                                                       | > 1.5 mg/dL | 12,003  | 7.5%                | 7.5%                  | 1,109                              | 13.4%                                    |
|                                                       | Unknown     | 3,423   | 2.1%                | 2.1%                  | 66                                 | 0.8%                                     |
| <b>Prescribed insulin</b>                             | No          | 147,610 | 92.4%               | 92.4%                 | 7,136                              | 85.9%                                    |
|                                                       | Yes         | 12,185  | 7.6%                | 7.6%                  | 1,167                              | 14.1%                                    |
| <b>RCRI surgical category</b>                         | High risk   | 27,709  | 23.8%               | 17.3%                 | 872                                | 10.5%                                    |
|                                                       | Other       | 88,929  | 76.2%               | 55.7%                 | 360                                | 4.3%                                     |
| <b>Area Deprivation Index</b>                         |             | 126,076 | 100.0%              | 78.9%                 | 7,091                              | 85.4%                                    |
| <b>RCRI (documented)</b>                              | 0           | 50,785  | 75.1%               | 31.8%                 | 1,548                              | 18.6%                                    |
|                                                       | 1           | 12,642  | 18.7%               | 7.9%                  | 988                                | 11.9%                                    |
|                                                       | 2           | 3,321   | 4.9%                | 2.1%                  | 402                                | 4.8%                                     |
|                                                       | 3           | 742     | 1.1%                | 0.5%                  | 108                                | 1.3%                                     |
|                                                       | 4           | 151     | 0.2%                | 0.1%                  | 21                                 | 0.3%                                     |
|                                                       | 5           | 15      | 0.0%                | 0.0%                  | 2                                  | 0.0%                                     |
| <b>RCRI (calculated)</b>                              | 0           | 56,879  | 52.0%               | 35.6%                 | 355                                | 4.3%                                     |

30

|  |                                                                   |                                            |        |       |       |       |       |
|--|-------------------------------------------------------------------|--------------------------------------------|--------|-------|-------|-------|-------|
|  |                                                                   | 1                                          | 36,020 | 32.9% | 22.5% | 393   | 4.7%  |
|  |                                                                   | 2                                          | 11,143 | 10.2% | 7.0%  | 245   | 3.0%  |
|  |                                                                   | 3                                          | 4,006  | 3.7%  | 2.5%  | 98    | 1.2%  |
|  |                                                                   | 4                                          | 1,172  | 1.1%  | 0.7%  | 33    | 0.4%  |
|  |                                                                   | 5                                          | 204    | 0.2%  | 0.1%  | 7     | 0.1%  |
|  |                                                                   | 6                                          | 12     | 0.0%  | 0.0%  | 0     | 0.0%  |
|  | <b>MICA risk estimate</b>                                         | ≤ 1%                                       | 71,448 | 44.7% | 44.7% | 608   | 7.3%  |
|  |                                                                   | > 1%                                       | 88,347 | 55.3% | 55.3% | 7,695 | 92.7% |
|  |                                                                   | 1                                          | 17,991 | 19.1% | 11.3% | 489   | 5.9%  |
|  |                                                                   | 1-2                                        | 13,386 | 14.2% | 8.4%  | 634   | 7.6%  |
|  |                                                                   | 2                                          | 40,829 | 43.4% | 25.6% | 1,739 | 20.9% |
|  | <b>Physician subjective assessment of patient global function</b> | 2-3                                        | 8,588  | 9.1%  | 5.4%  | 646   | 7.8%  |
|  |                                                                   | 3                                          | 9,310  | 9.9%  | 5.8%  | 732   | 8.8%  |
|  |                                                                   | 3-4                                        | 1,922  | 2.0%  | 1.2%  | 253   | 3.0%  |
|  |                                                                   | 4                                          | 1,999  | 2.1%  | 1.3%  | 175   | 2.1%  |
|  | <b>Insurance</b>                                                  | Medicare                                   | 20,744 | 52.2% | 13.0% | 1,192 | 14.4% |
|  |                                                                   | Medicaid                                   | 2,384  | 6.0%  | 1.5%  | 83    | 1.0%  |
|  |                                                                   | Private                                    | 14,764 | 37.1% | 9.2%  | 307   | 3.7%  |
|  |                                                                   | Other listed insurer                       | 1,881  | 4.7%  | 1.2%  | 53    | 0.6%  |
|  |                                                                   | 1                                          | 3,325  | 3.0%  | 2.1%  | 9     | 0.1%  |
|  |                                                                   | 2                                          | 34,026 | 30.9% | 21.3% | 181   | 2.2%  |
|  | <b>ASA Class</b>                                                  | 3                                          | 65,298 | 59.3% | 40.9% | 854   | 10.3% |
|  |                                                                   | 4                                          | 7,454  | 6.8%  | 4.7%  | 157   | 1.9%  |
|  |                                                                   | Anorectal                                  | 1,213  | 1.0%  | 0.8%  | 3     | 0.0%  |
|  |                                                                   | Aortic                                     | 115    | 0.1%  | 0.1%  | 34    | 0.4%  |
|  |                                                                   | Bariatric                                  | 703    | 0.6%  | 0.4%  | 6     | 0.1%  |
|  |                                                                   | Brain                                      | 4,780  | 4.1%  | 3.0%  | 15    | 0.2%  |
|  |                                                                   | Breast                                     | 8,541  | 7.4%  | 5.3%  | 17    | 0.2%  |
|  |                                                                   | Cardiac                                    | 237    | 0.2%  | 0.1%  | 10    | 0.1%  |
|  | <b>MICA surgical category</b>                                     | Ear, nose, throat                          | 3,640  | 3.1%  | 2.3%  | 19    | 0.2%  |
|  |                                                                   | Foregut/hepatopancreatobiliary             | 3,252  | 2.8%  | 2.0%  | 37    | 0.4%  |
|  |                                                                   | Gallbladder, appendix, adrenals, or spleen | 1,974  | 1.7%  | 1.2%  | 17    | 0.2%  |
|  |                                                                   | Gynecologic                                | 7,458  | 6.4%  | 4.7%  | 51    | 0.6%  |
|  |                                                                   | Hernia                                     | 2,778  | 2.4%  | 1.7%  | 16    | 0.2%  |

|                                                      |                        |         |        |        |       |        |
|------------------------------------------------------|------------------------|---------|--------|--------|-------|--------|
|                                                      | Intestines             | 16,081  | 13.9%  | 10.1%  | 87    | 1.0%   |
|                                                      | Neck                   | 3,076   | 2.7%   | 1.9%   | 18    | 0.2%   |
|                                                      | Nonesophageal thoracic | 290     | 0.2%   | 0.2%   | 4     | 0.0%   |
|                                                      | Orthopedic             | 26,005  | 22.4%  | 16.3%  | 208   | 2.5%   |
|                                                      | Other abdomen          | 1,970   | 1.7%   | 1.2%   | 19    | 0.2%   |
|                                                      | Peripheral vascular    | 1,355   | 1.2%   | 0.8%   | 110   | 1.3%   |
|                                                      | Skin                   | 7,126   | 6.1%   | 4.5%   | 78    | 0.9%   |
|                                                      | Spinal                 | 11,994  | 10.3%  | 7.5%   | 59    | 0.7%   |
|                                                      | Urologic               | 13,423  | 11.6%  | 8.4%   | 414   | 5.0%   |
|                                                      | Vein                   | 48      | 0.0%   | 0.0%   | 3     | 0.0%   |
| <b>Before or after release of current guideline</b>  | Before                 | 98,465  | 61.6%  | 61.6%  | 5,911 | 71.2%  |
|                                                      | After                  | 61,330  | 38.4%  | 38.4%  | 2,392 | 28.8%  |
| <b>Able to perform activities of at least 4 METs</b> | No                     | 90,260  | 56.5%  | 56.5%  | 5,713 | 68.8%  |
|                                                      | Yes                    | 69,535  | 43.5%  | 43.5%  | 2,590 | 31.2%  |
| <b>Tobacco use</b>                                   | Current smoker         | 18,806  | 12.4%  | 11.8%  | 1,028 | 12.4%  |
|                                                      | Former smoker          | 62,067  | 40.9%  | 38.8%  | 3,834 | 46.2%  |
|                                                      | Never smoker           | 70,966  | 46.7%  | 44.4%  | 2,976 | 35.8%  |
| <b>Probability of obstructive CAD</b>                |                        | 159,793 | 100.0% | 100.0% | 8,303 | 100.0% |

Table 2: Summary of continuous variables.

|                                                      | <b>Mean ± SD</b> |
|------------------------------------------------------|------------------|
| <b>Age (years)</b>                                   | 58.8 ± 15.2      |
| <b>Systolic Blood Pressure</b>                       | 129 ± 19.1       |
| <b>Diastolic Blood Pressure</b>                      | 73 ± 11.3        |
| <b>Body Mass Index</b>                               | 30.1 ± 7.6       |
| <b>Creatinine</b>                                    | 1.02 ± 0.85      |
| <b>Area Deprivation Index</b>                        | 54.2 ± 24.6      |
| <b>Estimated METs of activity</b>                    | 5.22 ± 1.35      |
| <b>MICA risk estimate</b>                            | 0.021 ± 0.025    |
| <b>Previous patients seen by physician in clinic</b> | 1,587 ± 1,536    |
| <b>Predicted probability of obstructive CAD</b>      | 0.129 ± 0.136    |

Table 3. Marginal results for each variable in our final model, with all other variables held at their medians.

For example, with all other variables at their respective medians, a visit on June 30, 2008 would have resulted in preoperative stress testing approximately 3.5% of the time, while a visit on June 30, 2018 would have resulted in preoperative stress testing approximately 1.3% of the time. Provider effects are summarized for space considerations; full marginal results by physician are included in the Supplemental Appendix.

| Predictor                                        | Value | Marginal Rate | 95% CI    |
|--------------------------------------------------|-------|---------------|-----------|
| <b>MICA estimate &gt; 1%</b>                     | 0     | 0.6%          | 0.6% 0.7% |
|                                                  | 1     | 7.1%          | 6.7% 7.5% |
| <b>RCRI (documented)</b>                         | 0     | 2.2%          | 2.0% 2.3% |
|                                                  | 1     | 2.7%          | 2.5% 2.9% |
|                                                  | 2     | 3.4%          | 3.0% 3.8% |
|                                                  | 3     | 4.2%          | 3.5% 5.0% |
|                                                  | 4     | 5.1%          | 4.0% 6.5% |
|                                                  | 5     | 6.4%          | 4.7% 8.6% |
| <b>Subjective assessment of patient function</b> | 1     | 2.1%          | 1.9% 2.2% |
|                                                  | 2     | 2.4%          | 2.2% 2.5% |
|                                                  | 3     | 2.8%          | 2.6% 3.0% |
|                                                  | 4     | 3.2%          | 2.9% 3.5% |
| <b>Estimated METs</b>                            | 2     | 3.3%          | 2.9% 3.7% |
|                                                  | 4     | 2.7%          | 2.5% 2.9% |
|                                                  | 8     | 1.8%          | 1.6% 1.9% |
| <b>Body mass index</b>                           | 20    | 2.1%          | 1.9% 2.3% |
|                                                  | 30    | 2.4%          | 2.2% 2.5% |
|                                                  | 40    | 2.7%          | 2.5% 2.9% |
|                                                  | 70    | 2.3%          | 2.2% 2.5% |
| <b>Diastolic blood pressure</b>                  | 90    | 2.5%          | 2.3% 2.7% |
|                                                  | 110   | 2.7%          | 2.4% 3.0% |
|                                                  | No    | 2.1%          | 2.0% 2.3% |
| <b>Ischemic heart disease</b>                    | Yes   | 3.6%          | 3.3% 3.9% |
|                                                  | No    | 2.4%          | 2.2% 2.5% |

|                                                 |                     |       |      |       |
|-------------------------------------------------|---------------------|-------|------|-------|
| <b>failure</b>                                  | Yes                 | 2.1%  | 1.9% | 2.3%  |
|                                                 | 10                  | 2.8%  | 2.5% | 3.1%  |
| <b>Area deprivation index</b>                   | 50                  | 2.2%  | 2.0% | 2.3%  |
|                                                 | 90                  | 2.6%  | 2.4% | 2.8%  |
| <b>Predicted probability of obstructive CAD</b> | 5%                  | 2.6%  | 2.4% | 2.7%  |
|                                                 | 10%                 | 2.4%  | 2.3% | 2.6%  |
|                                                 | 20%                 | 2.2%  | 2.1% | 2.4%  |
| <b>Tobacco use</b>                              | Current smoker      | 2.6%  | 2.3% | 2.8%  |
|                                                 | Former smoker       | 2.5%  | 2.3% | 2.7%  |
|                                                 | Neither             | 2.2%  | 2.1% | 2.4%  |
| <b>Date</b>                                     | 2008.06.30          | 3.5%  | 3.2% | 3.8%  |
|                                                 | 2013.06.30          | 2.6%  | 2.4% | 2.8%  |
|                                                 | 2018.06.30          | 1.3%  | 1.2% | 1.4%  |
| <b>Surgical category</b>                        | Aortic              | 23.4% | 6.0% | 91.1% |
|                                                 | Peripheral vascular | 8.7%  | 6.7% | 11.3% |
|                                                 | Urologic            | 9.2%  | 8.3% | 10.2% |
|                                                 | Other               | 1.9%  | 1.7% | 2.0%  |
| <b>Physician (summary)</b>                      | Lowest              | 1.0%  | 0.1% | 4.4%  |
|                                                 | 5th percentile      | 1.2%  | 0.6% | 2.6%  |
|                                                 | Median              | 2.3%  | 2.1% | 2.6%  |
|                                                 | 95th percentile     | 3.8%  | 3.2% | 4.5%  |
|                                                 | Highest             | 6.1%  | 2.7% | 13.5% |



1  
2  
3  
4  
5  
6  
7  
8  
9  
10  
11  
12  
13  
14  
15  
16  
17  
18  
19  
20  
21  
22  
23  
24  
25  
26  
27  
28  
29  
30  
31  
32  
33  
34  
35  
36  
37  
38  
39  
40  
41  
42  
43  
44  
45  
46  
47  
48  
49  
50  
51  
52  
53  
54  
55  
56  
57  
58  
59  
60

**Figure 1:** Unadjusted rates of preoperative stress testing, by physician.

[Attached separately as Figure\_01.tif]

For peer review only

1  
2  
3 **Figure 2:** Mean marginal rates of preoperative stress testing, by physician.  
4  
5

6  
7 [Attached separately as Figure\_o2.tif]  
8  
9  
10  
11  
12  
13  
14  
15  
16  
17  
18  
19  
20  
21  
22  
23  
24  
25  
26  
27  
28  
29  
30  
31  
32  
33  
34  
35  
36  
37  
38  
39  
40  
41  
42  
43  
44  
45  
46  
47  
48  
49  
50  
51  
52  
53  
54

55 37  
56  
57  
58  
59  
60

1  
2  
3  
4  
5  
6  
7  
8  
9  
10  
11  
12  
13  
14  
15  
16  
17  
18  
19  
20  
21  
22  
23  
24  
25  
26  
27  
28  
29  
30  
31  
32  
33  
34  
35  
36  
37  
38  
39  
40  
41  
42  
43  
44  
45  
46  
47  
48  
49  
50  
51  
52  
53  
54  
55  
56  
57  
58  
59  
60

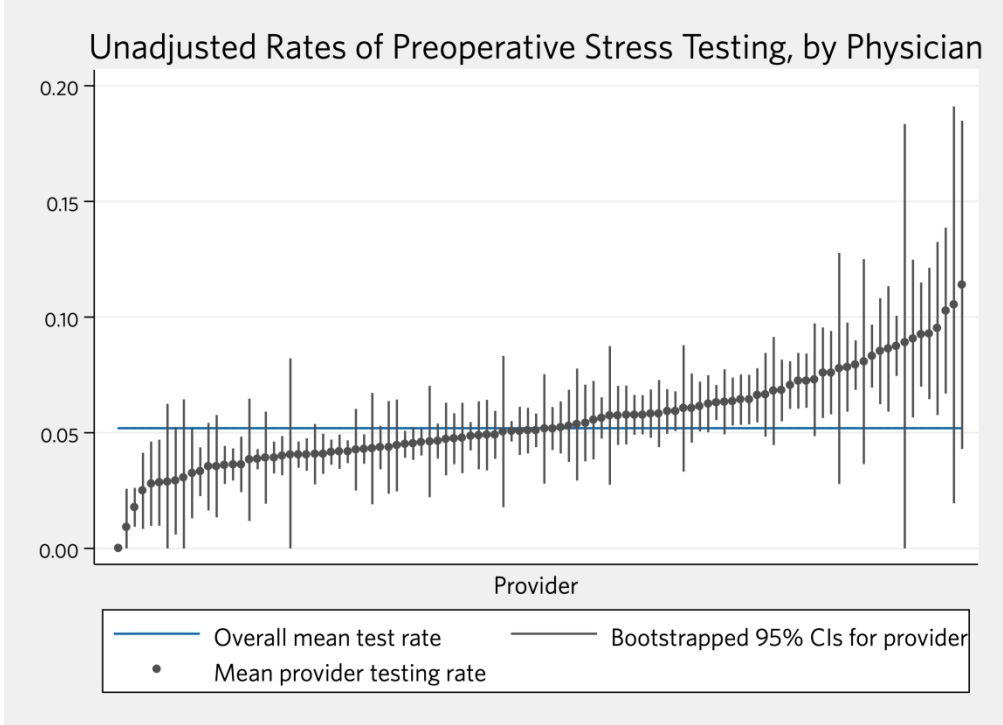

Figure 1: Unadjusted rates of preoperative stress testing, by physician

569x413mm (144 x 144 DPI)

1  
2  
3  
4  
5  
6  
7  
8  
9  
10  
11  
12  
13  
14  
15  
16  
17  
18  
19  
20  
21  
22  
23  
24  
25  
26  
27  
28  
29  
30  
31  
32  
33  
34  
35  
36  
37  
38  
39  
40  
41  
42  
43  
44  
45  
46  
47  
48  
49  
50  
51  
52  
53  
54  
55  
56  
57  
58  
59  
60



Figure 2: Mean marginal rates of preoperative stress testing, by physician

569x413mm (144 x 144 DPI)

1  
2  
3  
4  
5  
6  
7  
8  
9  
10  
11  
12  
13  
14  
15  
16  
17  
18  
19  
20  
21  
22  
23  
24  
25  
26  
27  
28  
29  
30  
31  
32  
33  
34  
35  
36  
37  
38  
39  
40  
41  
42  
43  
44  
45  
46  
47  
48  
49  
50  
51  
52  
53  
54  
55  
56  
57  
58  
59  
60

Supplemental Material for: Variation in preoperative stress testing by patient, physician, and surgical type

Matthew A Pappas, MD, MPH, Daniel I Sessler, MD, Andrew D Auerbach, MD, MPH, Michael W Kattan, PhD, Alex Milinovich, BA, Eugene Blackstone, MD, and Michael B Rothberg, MD, MPH

|    |                                                                                   |    |
|----|-----------------------------------------------------------------------------------|----|
| 1  |                                                                                   |    |
| 2  |                                                                                   |    |
| 3  | 1. Regression results, clustered by physician                                     | 3  |
| 4  |                                                                                   |    |
| 5  | 2. Physician marginal rates of stress testing                                     | 4  |
| 6  |                                                                                   |    |
| 7  | 3. Physician rates of stress testing, unadjusted and marginal                     | 8  |
| 8  |                                                                                   |    |
| 9  | 4. Calibration of final model                                                     | 9  |
| 10 |                                                                                   |    |
| 11 | 5. Expected testing rates with an identical population                            | 10 |
| 12 |                                                                                   |    |
| 13 | 6. Sensitivity analysis excluding patients planned for aortic or vascular surgery | 11 |
| 14 |                                                                                   |    |
| 15 |                                                                                   |    |
| 16 |                                                                                   |    |
| 17 |                                                                                   |    |
| 18 |                                                                                   |    |
| 19 |                                                                                   |    |
| 20 |                                                                                   |    |
| 21 |                                                                                   |    |
| 22 |                                                                                   |    |
| 23 |                                                                                   |    |
| 24 |                                                                                   |    |
| 25 |                                                                                   |    |
| 26 |                                                                                   |    |
| 27 |                                                                                   |    |
| 28 |                                                                                   |    |
| 29 |                                                                                   |    |
| 30 |                                                                                   |    |
| 31 |                                                                                   |    |
| 32 |                                                                                   |    |
| 33 |                                                                                   |    |
| 34 |                                                                                   |    |
| 35 |                                                                                   |    |
| 36 |                                                                                   |    |
| 37 |                                                                                   |    |
| 38 |                                                                                   |    |
| 39 |                                                                                   |    |
| 40 |                                                                                   |    |
| 41 |                                                                                   |    |
| 42 |                                                                                   |    |
| 43 |                                                                                   |    |
| 44 |                                                                                   |    |
| 45 |                                                                                   |    |
| 46 |                                                                                   |    |
| 47 |                                                                                   |    |
| 48 |                                                                                   |    |
| 49 |                                                                                   |    |
| 50 |                                                                                   |    |
| 51 |                                                                                   |    |
| 52 |                                                                                   |    |
| 53 |                                                                                   |    |
| 54 |                                                                                   |    |
| 55 |                                                                                   |    |
| 56 |                                                                                   |    |
| 57 |                                                                                   |    |
| 58 |                                                                                   |    |
| 59 |                                                                                   |    |
| 60 |                                                                                   |    |

# 1. Regression results, clustered by physician

Results have been edited/trimmed for clarity and brevity. Interaction terms have been replaced in the table below with exponents (^2) when applicable. All dichotomous variables (those prepended with "1." in the table) use a value of 0 as the referent.

| Completed or cancelled test   | Beta Coef. | Std. Err. | t     | P> t  | [95% Conf. Interval] |           |
|-------------------------------|------------|-----------|-------|-------|----------------------|-----------|
| -----                         |            |           |       |       |                      |           |
| 1.aortic_surgery              | 2.522167   | .6078339  | 4.15  | 0.002 | 1.166378             | 3.877956  |
| 1.peripheral_vascular_surgery | 1.531945   | .1152814  | 13.29 | 0.000 | 1.285334             | 1.778556  |
| 1.urologic_surgery            | 1.5871     | .0657605  | 24.13 | 0.000 | 1.446111             | 1.728088  |
| documented_RCRI               | .2135885   | .03032    | 7.04  | 0.000 | .1506825             | .2764944  |
| 1.Gupta_greater_than_1pct     | 2.422218   | .0472362  | 51.28 | 0.000 | 2.329492             | 2.514944  |
| Estimated METs                | -.1030793  | .0128133  | -8.04 | 0.000 | -.1284818            | -.0776767 |
| functional_class              | .1444786   | .0214833  | 6.73  | 0.000 | .1020898             | .1868674  |
| ADI_national                  | -.0141123  | .0025089  | -5.62 | 0.000 | -.0190783            | -.0091463 |
| ADI_national^2                | .0001325   | .0000221  | 5.99  | 0.000 | .0000888             | .0001763  |
| BMI                           | .0120129   | .0016333  | 7.36  | 0.000 | .0088076             | .0152182  |
| DBP                           | .0037949   | .0011446  | 3.32  | 0.001 | .0015493             | .0060406  |
| 1.ischemic_heart_disease      | .5187915   | .0390133  | 13.30 | 0.000 | .4412007             | .5963823  |
| predicted_prob_of_CAD         | -.9799052  | .1105385  | -8.86 | 0.000 | -1.198045            | -.761765  |
| 1.congestive_heart_failure    | -.1196815  | .0476752  | -2.51 | 0.014 | -.2142709            | -.0250922 |
| date                          | .002128    | .0004881  | 4.36  | 0.000 | .0011708             | .0030853  |
| date^2                        | -6.15e-08  | 1.25e-08  | -4.92 | 0.000 | -8.61e-08            | -3.70e-08 |
| 1.current_smoker              | .1436825   | .0424903  | 3.38  | 0.001 | .0603125             | .2270526  |
| 1.former_smoker               | .1288456   | .0290712  | 4.43  | 0.000 | .0718283             | .1858628  |
| constant                      | -23.48573  | 4.748773  | -4.95 | 0.000 | -32.79838            | -14.17308 |
| -----                         |            |           |       |       |                      |           |
| /lnsig2u                      | -3.592461  | .2658187  |       |       | -4.113895            | -3.071026 |
| -----                         |            |           |       |       |                      |           |
| sigma_u                       | .1659232   | .0220527  |       |       | .1278436             | .2153451  |
| rho                           | .0082988   | .0021877  |       |       | .0049434             | .0138999  |
| -----                         |            |           |       |       |                      |           |

## 2. Physician marginal rates of stress testing

Due to space constraints, only selected physician marginal results are displayed in Table 3. Here we present full marginal results by physician. These are also displayed visually in Figure 2.

| Physician Rank | Marginal Rate | 95% CI        |
|----------------|---------------|---------------|
| <b>1</b>       | 0.58%         | 0.08% - 4.40% |
| <b>2</b>       | 1.00%         | 0.28% - 3.57% |
| <b>3</b>       | 1.07%         | 0.52% - 2.18% |
| <b>4</b>       | 1.20%         | 0.47% - 3.08% |
| <b>5</b>       | 1.22%         | 0.34% - 4.33% |
| <b>6</b>       | 1.25%         | 0.59% - 2.64% |
| <b>7</b>       | 1.39%         | 0.68% - 2.88% |
| <b>8</b>       | 1.50%         | 1.13% - 1.97% |
| <b>9</b>       | 1.52%         | 0.52% - 4.46% |
| <b>10</b>      | 1.55%         | 0.85% - 2.83% |
| <b>11</b>      | 1.56%         | 0.82% - 2.97% |
| <b>12</b>      | 1.60%         | 0.79% - 3.23% |
| <b>13</b>      | 1.64%         | 1.12% - 2.42% |
| <b>14</b>      | 1.67%         | 0.98% - 2.83% |
| <b>15</b>      | 1.68%         | 1.17% - 2.39% |
| <b>16</b>      | 1.68%         | 1.01% - 2.80% |
| <b>17</b>      | 1.70%         | 0.95% - 3.03% |
| <b>18</b>      | 1.73%         | 1.05% - 2.82% |
| <b>19</b>      | 1.78%         | 1.53% - 2.06% |
| <b>20</b>      | 1.80%         | 1.41% - 2.30% |
| <b>21</b>      | 1.87%         | 1.29% - 2.71% |
| <b>22</b>      | 1.89%         | 1.45% - 2.47% |
| <b>23</b>      | 1.93%         | 1.16% - 3.22% |
| <b>24</b>      | 1.95%         | 1.65% - 2.29% |



| Physician Rank | Marginal Rate | 95% CI        |
|----------------|---------------|---------------|
| <b>25</b>      | 1.96%         | 1.56% - 2.45% |
| <b>26</b>      | 1.99%         | 1.63% - 2.42% |
| <b>27</b>      | 1.99%         | 1.17% - 3.38% |
| <b>28</b>      | 1.99%         | 1.42% - 2.80% |
| <b>29</b>      | 2.02%         | 1.62% - 2.52% |
| <b>30</b>      | 2.03%         | 1.71% - 2.42% |
| <b>31</b>      | 2.04%         | 1.45% - 2.89% |
| <b>32</b>      | 2.05%         | 1.20% - 3.48% |
| <b>33</b>      | 2.06%         | 1.70% - 2.48% |
| <b>34</b>      | 2.06%         | 1.48% - 2.87% |
| <b>35</b>      | 2.09%         | 1.77% - 2.46% |
| <b>36</b>      | 2.10%         | 1.64% - 2.69% |
| <b>37</b>      | 2.12%         | 1.75% - 2.57% |
| <b>38</b>      | 2.13%         | 1.75% - 2.60% |
| <b>39</b>      | 2.13%         | 1.67% - 2.73% |
| <b>40</b>      | 2.13%         | 1.20% - 3.80% |
| <b>41</b>      | 2.14%         | 1.75% - 2.62% |
| <b>42</b>      | 2.15%         | 1.68% - 2.76% |
| <b>43</b>      | 2.19%         | 1.86% - 2.58% |
| <b>44</b>      | 2.19%         | 1.87% - 2.56% |
| <b>45</b>      | 2.20%         | 1.89% - 2.55% |
| <b>46</b>      | 2.22%         | 1.93% - 2.56% |
| <b>47</b>      | 2.24%         | 1.76% - 2.84% |
| <b>48</b>      | 2.26%         | 1.74% - 2.93% |
| <b>49</b>      | 2.27%         | 1.76% - 2.93% |
| <b>50</b>      | 2.27%         | 1.75% - 2.95% |
| <b>51</b>      | 2.29%         | 1.70% - 3.08% |

| Physician Rank | Marginal Rate | 95% CI        |
|----------------|---------------|---------------|
| <b>52</b>      | 2.32%         | 1.63% - 3.30% |
| <b>53</b>      | 2.32%         | 2.07% - 2.61% |
| <b>54</b>      | 2.33%         | 1.68% - 3.23% |
| <b>55</b>      | 2.34%         | 1.89% - 2.89% |
| <b>56</b>      | 2.35%         | 1.59% - 3.48% |
| <b>57</b>      | 2.36%         | 1.40% - 3.97% |
| <b>58</b>      | 2.39%         | 1.97% - 2.90% |
| <b>59</b>      | 2.40%         | 1.74% - 3.32% |
| <b>60</b>      | 2.43%         | 1.84% - 3.22% |
| <b>61</b>      | 2.46%         | 1.81% - 3.36% |
| <b>62</b>      | 2.48%         | 2.02% - 3.05% |
| <b>63</b>      | 2.49%         | 1.93% - 3.22% |
| <b>64</b>      | 2.50%         | 2.03% - 3.09% |
| <b>65</b>      | 2.51%         | 1.64% - 3.86% |
| <b>66</b>      | 2.53%         | 1.89% - 3.39% |
| <b>67</b>      | 2.56%         | 1.95% - 3.37% |
| <b>68</b>      | 2.58%         | 2.03% - 3.30% |
| <b>69</b>      | 2.62%         | 1.76% - 3.91% |
| <b>70</b>      | 2.68%         | 2.29% - 3.12% |
| <b>71</b>      | 2.68%         | 1.73% - 4.14% |
| <b>72</b>      | 2.70%         | 2.07% - 3.52% |
| <b>73</b>      | 2.71%         | 2.20% - 3.33% |
| <b>74</b>      | 2.75%         | 1.98% - 3.81% |
| <b>75</b>      | 2.75%         | 2.13% - 3.55% |
| <b>76</b>      | 2.75%         | 2.13% - 3.55% |
| <b>77</b>      | 2.76%         | 2.24% - 3.41% |
| <b>78</b>      | 2.76%         | 1.91% - 4.00% |

| Physician Rank | Marginal Rate | 95% CI         |
|----------------|---------------|----------------|
| <b>79</b>      | 2.86%         | 2.27% - 3.60%  |
| <b>80</b>      | 2.87%         | 2.14% - 3.86%  |
| <b>81</b>      | 2.89%         | 2.38% - 3.52%  |
| <b>82</b>      | 2.92%         | 1.47% - 5.81%  |
| <b>83</b>      | 2.94%         | 1.17% - 7.38%  |
| <b>84</b>      | 2.99%         | 2.55% - 3.51%  |
| <b>85</b>      | 3.09%         | 2.28% - 4.19%  |
| <b>86</b>      | 3.09%         | 2.50% - 3.81%  |
| <b>87</b>      | 3.09%         | 1.93% - 4.95%  |
| <b>88</b>      | 3.09%         | 2.51% - 3.82%  |
| <b>89</b>      | 3.17%         | 2.52% - 3.99%  |
| <b>90</b>      | 3.22%         | 2.62% - 3.96%  |
| <b>91</b>      | 3.33%         | 1.23% - 9.05%  |
| <b>92</b>      | 3.39%         | 1.76% - 6.55%  |
| <b>93</b>      | 3.40%         | 1.50% - 7.69%  |
| <b>94</b>      | 3.50%         | 1.77% - 6.91%  |
| <b>95</b>      | 3.57%         | 1.13% - 11.27% |
| <b>96</b>      | 3.59%         | 2.97% - 4.34%  |
| <b>97</b>      | 3.60%         | 1.91% - 6.79%  |
| <b>98</b>      | 3.77%         | 2.44% - 5.83%  |
| <b>99</b>      | 3.79%         | 3.18% - 4.51%  |
| <b>100</b>     | 3.80%         | 2.67% - 5.43%  |
| <b>101</b>     | 3.89%         | 2.60% - 5.83%  |
| <b>102</b>     | 3.91%         | 2.56% - 5.96%  |
| <b>103</b>     | 4.11%         | 2.71% - 6.23%  |
| <b>104</b>     | 6.08%         | 2.74% - 13.51% |

### 3. Physician rates of stress testing, unadjusted and marginal

Figure 1 demonstrates unadjusted rates of stress testing, and Figure 2 demonstrates marginal predictions for each physician, controlling for all other factors. Here we overlay the marginal results on the unadjusted results to demonstrate the effect of adjustment.



#### 4. Calibration of final model

Based on the plot above, we suspected less-than-ideal calibration of our final model. We do not know of a universally accepted method to assess the calibration of a multilevel model on multiply-imputed data, but in most of our assessments this model fails Hosmer-Lemeshow Goodness-of-Fit testing, and the calibration plot shown here (binned into centiles) indeed suggests poor calibration. We emphasize again that our goal here is to explain variance in testing, not to guide future physicians in who should be referred for stress testing or to enable individual physician profiling.

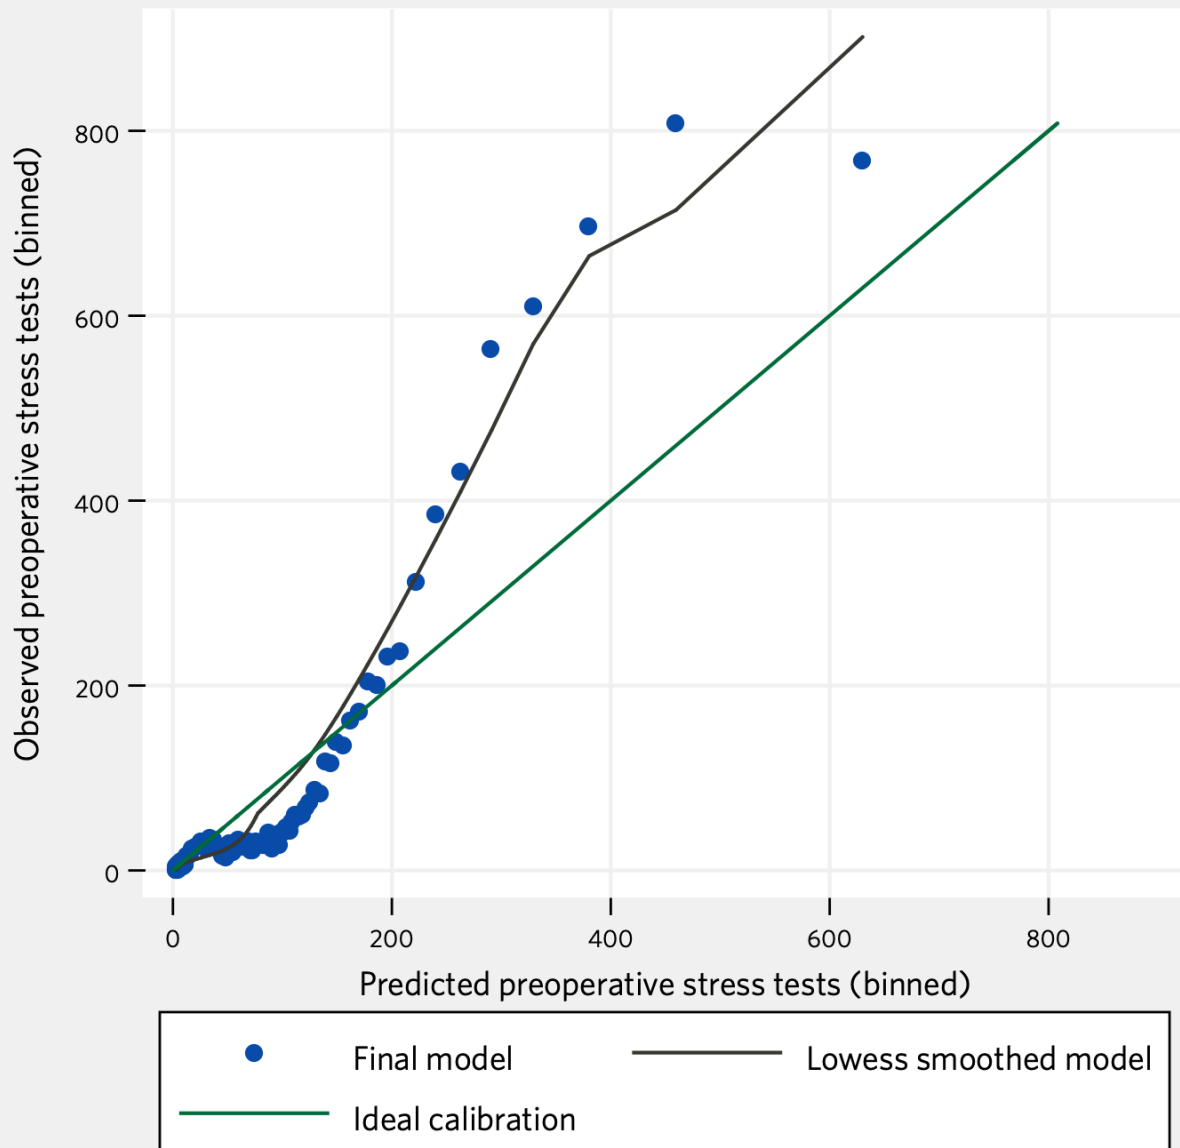

## 5. Expected testing rates with an identical population

One way to contextualize provider effects is to imagine that each provider sees an identical panel of patients and estimate the consequent differences in outcomes. Here, we sampled 1,000 patients from our original population and estimated rates of stress testing if that same cohort were seen by each physician in our dataset. The overall mean is the expected rate for this small cohort without controlling for physician ID.



## 6. Sensitivity analysis excluding patients planned for aortic or vascular surgery

We repeated our analysis while excluding patients who were considered for aortic or vascular surgery. As in all models with dichotomous outcomes, the fixed variance leads to different effect sizes when using a different list of predictors. All effects are in the same direction as in our base-case analysis, as shown below. All changes in effect size are smaller than the smallest effect size in our base-case model (congestive heart failure). We have highlighted results where marginal rates differ from the base case by 0.02% or greater. This is an arbitrary threshold based on the intuition that a difference of less than 1 test per 500 visits is small. Due to rounding, some cells with less than a 0.2% absolute difference are displayed as differences of 0.2% in the cells below.

This analysis includes a total of 151,213 visits.

| Predictor                              | Value | Mean marginal rate, base case | 95% CI        | Mean marginal rate with aortic and vascular surgery patients excluded | 95% CI        |
|----------------------------------------|-------|-------------------------------|---------------|-----------------------------------------------------------------------|---------------|
| <b>MICA &gt; 1%</b>                    | 0     | 0.6%                          | (0.6% - 0.7%) | 0.6%                                                                  | (0.5% - 0.7%) |
|                                        | 1     | 7.1%                          | (6.7% - 7.5%) | 6.8%                                                                  | (6.4% - 7.1%) |
| <b>Documented RCRI</b>                 | 0     | 2.2%                          | (2.0% - 2.3%) | 2.1%                                                                  | (1.9% - 2.2%) |
|                                        | 1     | 2.7%                          | (2.5% - 2.9%) | 2.6%                                                                  | (2.4% - 2.8%) |
|                                        | 2     | 3.4%                          | (3.0% - 3.8%) | 3.2%                                                                  | (2.8% - 3.6%) |
|                                        | 3     | 4.2%                          | (3.5% - 5.0%) | 3.9%                                                                  | (3.3% - 4.7%) |
|                                        | 4     | 5.1%                          | (4.0% - 6.5%) | 4.9%                                                                  | (3.8% - 6.2%) |
|                                        | 5     | 6.4%                          | (4.7% - 8.6%) | 6.0%                                                                  | (4.4% - 8.2%) |
| <b>Functional class</b>                | 1     | 2.1%                          | (1.9% - 2.2%) | 2.0%                                                                  | (1.8% - 2.1%) |
|                                        | 2     | 2.4%                          | (2.2% - 2.5%) | 2.2%                                                                  | (2.1% - 2.4%) |
|                                        | 3     | 2.8%                          | (2.6% - 3.0%) | 2.6%                                                                  | (2.4% - 2.8%) |
|                                        | 4     | 3.2%                          | (2.9% - 3.5%) | 2.9%                                                                  | (2.6% - 3.3%) |
| <b>Estimated metabolic equivalents</b> | 2     | 3.3%                          | (2.9% - 3.7%) | 3.0%                                                                  | (2.7% - 3.4%) |
|                                        | 4     | 2.7%                          | (2.5% - 2.9%) | 2.5%                                                                  | (2.3% - 2.7%) |
|                                        | 8     | 1.8%                          | (1.6% - 1.9%) | 1.7%                                                                  | (1.5% - 1.9%) |
| <b>Body mass index</b>                 | 20    | 2.1%                          | (1.9% - 2.3%) | 2.0%                                                                  | (1.8% - 2.1%) |
|                                        | 30    | 2.4%                          | (2.2% - 2.5%) | 2.2%                                                                  | (2.1% - 2.4%) |
|                                        | 40    | 2.7%                          | (2.5% - 2.9%) | 2.5%                                                                  | (2.3% - 2.7%) |

| Predictor                                                    | Value               | Mean marginal rate, base case | 95% CI         | Mean marginal rate with aortic and vascular surgery patients excluded | 95% CI        |
|--------------------------------------------------------------|---------------------|-------------------------------|----------------|-----------------------------------------------------------------------|---------------|
| Diastolic blood pressure                                     | 70                  | 2.3%                          | (2.2% - 2.5%)  | 2.2%                                                                  | (2.1% - 2.4%) |
|                                                              | 90                  | 2.5%                          | (2.3% - 2.7%)  | 2.4%                                                                  | (2.2% - 2.6%) |
|                                                              | 110                 | 2.7%                          | (2.4% - 3.0%)  | 2.6%                                                                  | (2.3% - 2.9%) |
| Ischemic heart disease                                       | 0                   | 2.1%                          | (2.0% - 2.3%)  | 2.0%                                                                  | (1.9% - 2.2%) |
|                                                              | 1                   | 3.6%                          | (3.3% - 3.9%)  | 3.3%                                                                  | (3.1% - 3.7%) |
| Congestive heart failure                                     | 0                   | 2.4%                          | (2.2% - 2.5%)  | 2.3%                                                                  | (2.1% - 2.4%) |
|                                                              | 1                   | 2.1%                          | (1.9% - 2.3%)  | 2.0%                                                                  | (1.8% - 2.2%) |
| Area deprivation index                                       | 10                  | 2.8%                          | (2.5% - 3.1%)  | 2.6%                                                                  | (2.4% - 2.9%) |
|                                                              | 50                  | 2.2%                          | (2.0% - 2.3%)  | 2.1%                                                                  | (1.9% - 2.2%) |
|                                                              | 90                  | 2.6%                          | (2.4% - 2.8%)  | 2.4%                                                                  | (2.2% - 2.7%) |
| Predicted probability of obstructive coronary artery disease | 5%                  | 2.6%                          | (2.4% - 2.7%)  | 2.4%                                                                  | (2.3% - 2.6%) |
|                                                              | 10%                 | 2.4%                          | (2.3% - 2.6%)  | 2.3%                                                                  | (2.2% - 2.5%) |
|                                                              | 20%                 | 2.2%                          | (2.1% - 2.4%)  | 2.1%                                                                  | (1.9% - 2.2%) |
| Tobacco use                                                  | Current smoker      | 2.6%                          | (2.3% - 2.8%)  | 2.4%                                                                  | (2.2% - 2.7%) |
|                                                              | Former smoker       | 2.5%                          | (2.3% - 2.7%)  | 2.4%                                                                  | (2.2% - 2.6%) |
|                                                              | Neither             | 2.2%                          | (2.1% - 2.4%)  | 2.1%                                                                  | (1.9% - 2.2%) |
| Date                                                         | 2008.06.30          | 3.5%                          | (3.2% - 3.8%)  | 3.3%                                                                  | (3.0% - 3.6%) |
|                                                              | 2013.06.30          | 2.6%                          | (2.4% - 2.8%)  | 2.5%                                                                  | (2.3% - 2.7%) |
|                                                              | 2018.06.30          | 1.3%                          | (1.2% - 1.4%)  | 1.2%                                                                  | (1.1% - 1.3%) |
| Surgical category                                            | Aortic              | 23.4%                         | (6.0% - 91.1%) | -                                                                     |               |
|                                                              | Peripheral vascular | 8.7%                          | (6.7% - 11.3%) | -                                                                     |               |
|                                                              | Urologic            | 9.2%                          | (8.3% - 10.2%) | 8.8%                                                                  | (7.9% - 9.9%) |
|                                                              | Other               | 1.9%                          | (1.7% - 2.0%)  | 1.8%                                                                  | (1.7% - 2.0%) |
| Physician (summary)                                          | Lowest              | 1.0%                          | (0.1% - 4.4%)  | 0.5%                                                                  | (0.1% - 3.6%) |
|                                                              | 5th percentile      | 1.2%                          | (0.6% - 2.6%)  | 0.8%                                                                  | (0.3% - 1.8%) |
|                                                              | Median              | 2.3%                          | (2.1% - 2.6%)  | 1.6%                                                                  | (1.2% - 2.0%) |



1  
2  
3  
4  
5  
6  
7  
8  
9  
10  
11  
12  
13  
14  
15  
16  
17  
18  
19  
20  
21  
22  
23  
24  
25  
26  
27  
28  
29  
30  
31  
32  
33  
34  
35  
36  
37  
38  
39  
40  
41  
42  
43  
44  
45  
46  
47  
48  
49  
50  
51  
52  
53  
54  
55  
56  
57  
58  
59  
60

| <b>Predictor</b> | <b>Value</b>    | <b>Mean marginal rate, base case</b> | <b>95% CI</b> | <b>Mean marginal rate with aortic and vascular surgery patients excluded</b> | <b>95% CI</b> |
|------------------|-----------------|--------------------------------------|---------------|------------------------------------------------------------------------------|---------------|
|                  | 95th percentile | 3.8%                                 | (3.2% - 4.5%) | 2.7%                                                                         | (1.8% - 4.1%) |
|                  | Highest         | 6.1%                                 | (2.7% -13.5%) | 4.5%                                                                         | (1.8% -11.3%) |

## 7. Marginal testing rate as a function of physician experience

As with all datasets, our conclusions are a product of many decisions. For example, although we rejected physician experience as a predictor of testing rate in favor of date and a physician-specific random effect, reasonable investigators could disagree. To generate the graph below, we replaced date in our model with the number of visits each physician had completed between the beginning of our dataset and the visit in question (a proxy for preoperative clinic experience). We then computed and graphed marginal probabilities as described in our primary results.

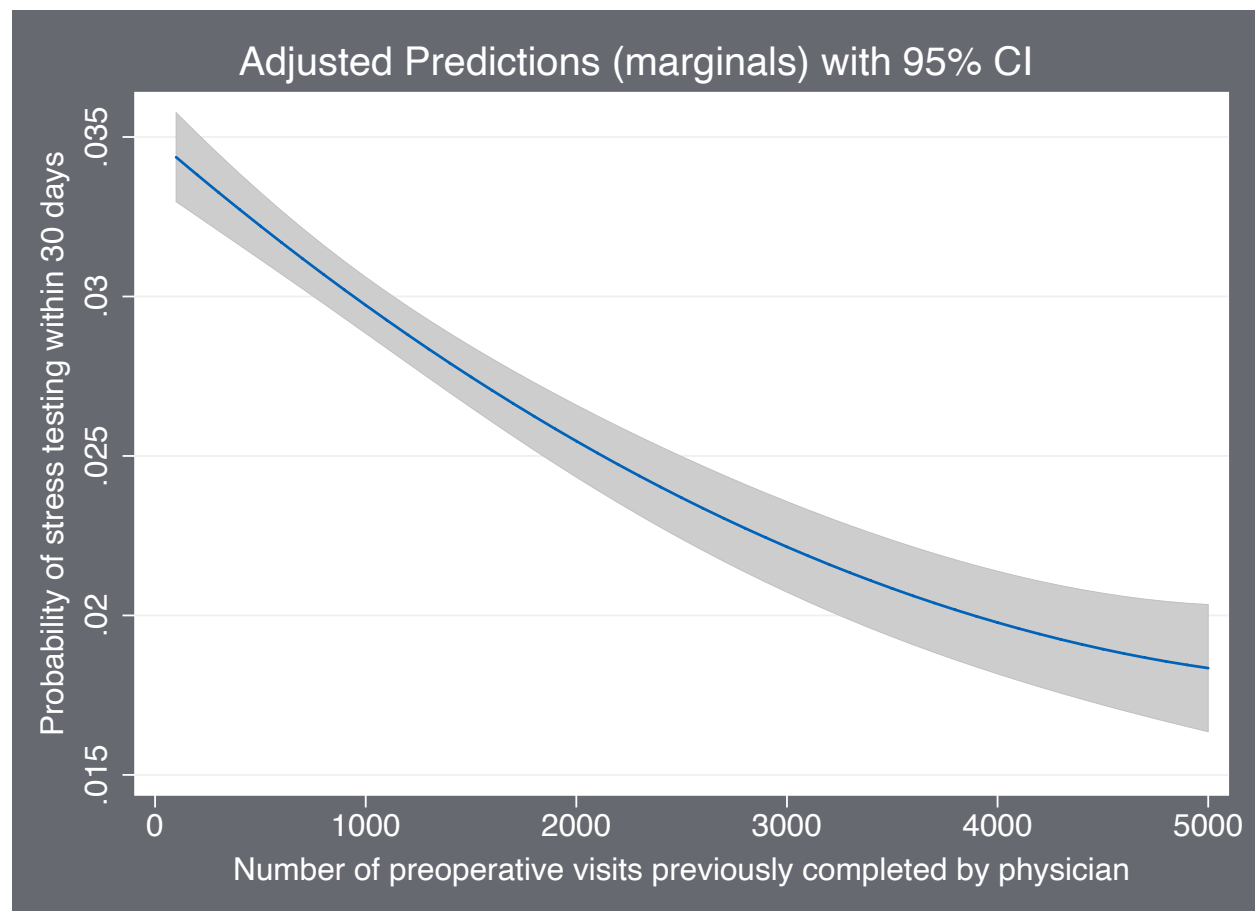

STROBE Statement—Checklist of items that should be included in reports of *cohort studies*

|                              | Item No | Recommendation                                                                                                                                                                                                                                                                                                         | Page No                        |
|------------------------------|---------|------------------------------------------------------------------------------------------------------------------------------------------------------------------------------------------------------------------------------------------------------------------------------------------------------------------------|--------------------------------|
| <b>Title and abstract</b>    | 1       | (a) Indicate the study's design with a commonly used term in the title or the abstract<br>(b) Provide in the abstract an informative and balanced summary of what was done and what was found                                                                                                                          | 2<br>2-3                       |
| <b>Introduction</b>          |         |                                                                                                                                                                                                                                                                                                                        |                                |
| Background/rationale         | 2       | Explain the scientific background and rationale for the investigation being reported                                                                                                                                                                                                                                   | 4                              |
| Objectives                   | 3       | State specific objectives, including any prespecified hypotheses                                                                                                                                                                                                                                                       | 4                              |
| <b>Methods</b>               |         |                                                                                                                                                                                                                                                                                                                        |                                |
| Study design                 | 4       | Present key elements of study design early in the paper                                                                                                                                                                                                                                                                | 5                              |
| Setting                      | 5       | Describe the setting, locations, and relevant dates, including periods of recruitment, exposure, follow-up, and data collection                                                                                                                                                                                        | 4-5                            |
| Participants                 | 6       | (a) Give the eligibility criteria, and the sources and methods of selection of participants. Describe methods of follow-up<br>(b) For matched studies, give matching criteria and number of exposed and unexposed                                                                                                      | 4-5<br>N/A                     |
| Variables                    | 7       | Clearly define all outcomes, exposures, predictors, potential confounders, and effect modifiers. Give diagnostic criteria, if applicable                                                                                                                                                                               | 5                              |
| Data sources/<br>measurement | 8*      | For each variable of interest, give sources of data and details of methods of assessment (measurement). Describe comparability of assessment methods if there is more than one group                                                                                                                                   | 5-8                            |
| Bias                         | 9       | Describe any efforts to address potential sources of bias                                                                                                                                                                                                                                                              | 9-10                           |
| Study size                   | 10      | Explain how the study size was arrived at                                                                                                                                                                                                                                                                              | 5                              |
| Quantitative variables       | 11      | Explain how quantitative variables were handled in the analyses. If applicable, describe which groupings were chosen and why                                                                                                                                                                                           | 5-10                           |
| Statistical methods          | 12      | (a) Describe all statistical methods, including those used to control for confounding<br>(b) Describe any methods used to examine subgroups and interactions<br>(c) Explain how missing data were addressed<br>(d) If applicable, explain how loss to follow-up was addressed<br>(e) Describe any sensitivity analyses | 8-10<br>5-10<br>9-10<br>5<br>5 |
| <b>Results</b>               |         |                                                                                                                                                                                                                                                                                                                        |                                |
| Participants                 | 13*     | (a) Report numbers of individuals at each stage of study—eg numbers potentially eligible, examined for eligibility, confirmed eligible, included in the study, completing follow-up, and analysed<br>(b) Give reasons for non-participation at each stage<br>(c) Consider use of a flow diagram                        | 5,10<br>17                     |
| Descriptive data             | 14*     | (a) Give characteristics of study participants (eg demographic, clinical, social) and information on exposures and potential confounders<br>(b) Indicate number of participants with missing data for each variable of interest<br>(c) Summarise follow-up time (eg, average and total amount)                         | 26-27<br>26<br>5               |
| Outcome data                 | 15*     | Report numbers of outcome events or summary measures over time                                                                                                                                                                                                                                                         | 10                             |

|    |                          |    |                                                                                                                                                                                                              |               |
|----|--------------------------|----|--------------------------------------------------------------------------------------------------------------------------------------------------------------------------------------------------------------|---------------|
| 1  | Main results             | 16 | (a) Give unadjusted estimates and, if applicable, confounder-adjusted estimates and their precision (eg, 95% confidence interval). Make clear which confounders were adjusted for and why they were included | 10-11, 26, 28 |
| 2  |                          |    | (b) Report category boundaries when continuous variables were categorized                                                                                                                                    | 26            |
| 3  |                          |    | (c) If relevant, consider translating estimates of relative risk into absolute risk for a meaningful time period                                                                                             | 28            |
| 4  |                          |    |                                                                                                                                                                                                              |               |
| 5  | Other analyses           | 17 | Report other analyses done—eg analyses of subgroups and interactions, and sensitivity analyses                                                                                                               | 11-12         |
| 6  |                          |    |                                                                                                                                                                                                              |               |
| 7  | <b>Discussion</b>        |    |                                                                                                                                                                                                              |               |
| 8  | Key results              | 18 | Summarise key results with reference to study objectives                                                                                                                                                     | 12-15         |
| 9  | Limitations              | 19 | Discuss limitations of the study, taking into account sources of potential bias or imprecision. Discuss both direction and magnitude of any potential bias                                                   | 16-18         |
| 10 | Interpretation           | 20 | Give a cautious overall interpretation of results considering objectives, limitations, multiplicity of analyses, results from similar studies, and other relevant evidence                                   | 18            |
| 11 | Generalisability         | 21 | Discuss the generalisability (external validity) of the study results                                                                                                                                        | 17            |
| 12 | <b>Other information</b> |    |                                                                                                                                                                                                              |               |
| 13 | Funding                  | 22 | Give the source of funding and the role of the funders for the present study and, if applicable, for the original study on which the present article is based                                                | 1,19          |
| 14 |                          |    |                                                                                                                                                                                                              |               |

\*Give information separately for exposed and unexposed groups.

**Note:** An Explanation and Elaboration article discusses each checklist item and gives methodological background and published examples of transparent reporting. The STROBE checklist is best used in conjunction with this article (freely available on the Web sites of PLoS Medicine at <http://www.plosmedicine.org/>, Annals of Internal Medicine at <http://www.annals.org/>, and Epidemiology at <http://www.epidem.com/>). Information on the STROBE Initiative is available at <http://www.strobe-statement.org>.

# BMJ Open

## Variation in preoperative stress testing by patient, physician, and surgical type – a cohort study

|                                 |                                                                                                                                                                                                                                                                                                                                                                                                                                              |
|---------------------------------|----------------------------------------------------------------------------------------------------------------------------------------------------------------------------------------------------------------------------------------------------------------------------------------------------------------------------------------------------------------------------------------------------------------------------------------------|
| Journal:                        | <i>BMJ Open</i>                                                                                                                                                                                                                                                                                                                                                                                                                              |
| Manuscript ID                   | bmjopen-2020-048052.R2                                                                                                                                                                                                                                                                                                                                                                                                                       |
| Article Type:                   | Original research                                                                                                                                                                                                                                                                                                                                                                                                                            |
| Date Submitted by the Author:   | 08-Sep-2021                                                                                                                                                                                                                                                                                                                                                                                                                                  |
| Complete List of Authors:       | Pappas, Matthew; Cleveland Clinic, Department of Hospital Medicine<br>Sessler, Daniel; Cleveland Clinic, Outcomes Research<br>Auerbach, A; University of California, San Francisco<br>Kattan, Michael; Cleveland Clinic<br>Milinovich, Alex; Cleveland Clinic<br>Blackstone, Eugene; Cleveland Clinic, Miller Family Heart and Vascular Institute<br>Rothberg, Michael B.; Cleveland Clinic, Cleveland, USA, Department of Internal Medicine |
| <b>Primary Subject Heading</b>: | Health services research                                                                                                                                                                                                                                                                                                                                                                                                                     |
| Secondary Subject Heading:      | Cardiovascular medicine, Anaesthesia, Surgery, General practice / Family practice                                                                                                                                                                                                                                                                                                                                                            |
| Keywords:                       | INTERNAL MEDICINE, Adult surgery < SURGERY, Adult anaesthesia < ANAESTHETICS, Adult cardiology < CARDIOLOGY, HEALTH SERVICES ADMINISTRATION & MANAGEMENT                                                                                                                                                                                                                                                                                     |
|                                 |                                                                                                                                                                                                                                                                                                                                                                                                                                              |

SCHOLARONE™  
Manuscripts



I, the Submitting Author has the right to grant and does grant on behalf of all authors of the Work (as defined in the below author licence), an exclusive licence and/or a non-exclusive licence for contributions from authors who are: i) UK Crown employees; ii) where BMJ has agreed a CC-BY licence shall apply, and/or iii) in accordance with the terms applicable for US Federal Government officers or employees acting as part of their official duties; on a worldwide, perpetual, irrevocable, royalty-free basis to BMJ Publishing Group Ltd ("BMJ") its licensees and where the relevant Journal is co-owned by BMJ to the co-owners of the Journal, to publish the Work in this journal and any other BMJ products and to exploit all rights, as set out in our [licence](#).

The Submitting Author accepts and understands that any supply made under these terms is made by BMJ to the Submitting Author unless you are acting as an employee on behalf of your employer or a postgraduate student of an affiliated institution which is paying any applicable article publishing charge ("APC") for Open Access articles. Where the Submitting Author wishes to make the Work available on an Open Access basis (and intends to pay the relevant APC), the terms of reuse of such Open Access shall be governed by a Creative Commons licence – details of these licences and which [Creative Commons](#) licence will apply to this Work are set out in our licence referred to above.

Other than as permitted in any relevant BMJ Author's Self Archiving Policies, I confirm this Work has not been accepted for publication elsewhere, is not being considered for publication elsewhere and does not duplicate material already published. I confirm all authors consent to publication of this Work and authorise the granting of this licence.

## Variation in preoperative stress testing by patient, physician, and surgical type – a cohort study

Matthew A Pappas, MD, MPH,<sup>1,2,3</sup> Daniel I Sessler, MD,<sup>3,4</sup> Andrew D Auerbach, MD, MPH,<sup>5</sup> Michael W Kattan, PhD,<sup>6</sup> Alex Milinovich, BA,<sup>6</sup> Eugene H Blackstone, MD,<sup>7</sup> and Michael B Rothberg, MD, MPH<sup>1</sup>

- 1: Center for Value-based Care Research, Cleveland Clinic, Cleveland, OH
- 2: Department of Hospital Medicine, Cleveland Clinic, Cleveland, OH
- 3: Department of **OUTCOMES RESEARCH**, Anesthesiology Institute, Cleveland Clinic, Cleveland, OH
- 4: **OUTCOMES RESEARCH** Consortium, Cleveland, OH
- 5: Department of Hospital Medicine, University of California, San Francisco, San Francisco, CA
- 6: Department of Quantitative Health Sciences, Lerner Research Institute, Cleveland Clinic, Cleveland, OH
- 7: Miller Family Heart and Vascular Institute, Cleveland Clinic, Cleveland, OH

Correspondence to Matthew A Pappas: pappasm@ccf.org; 216.444.9565; 9500 Euclid Ave., Mail Stop G-10, Cleveland, OH 44195

Short title/running head: Variation in preoperative stress testing

Word count: 3,644

Abstract word count: 292

Number of references: 39

Number of tables: 3

Number of figures: 2

Number of appendices: 1

Financial support: This work was supported by the National Heart, Lung, and Blood Institute (NHLBI 1Ko8HL141598).

Competing Interests: None

Keywords (MEDLINE): Perioperative care  
Preoperative care  
Risk assessment  
Elective surgical procedures  
Cohort studies  
Exercise test  
Tomography, Emission-Computed, Single-Photon  
Echocardiography, Stress

**Abstract****Objectives:**

To describe variation in and drivers of contemporary preoperative cardiac stress testing.

**Setting:**

A dedicated preoperative risk assessment and optimization clinic at a large integrated medical center from 2008 through 2018.

**Participants:**

A cohort of 118,552 adult patients seen by 104 physicians across 159,795 visits to a preoperative risk assessment and optimization clinic.

**Main Outcome:**

Referral for stress testing before major surgery, including nuclear, echocardiographic, or electrocardiographic-only stress testing, within 30 days after a clinic visit.

**Results:**

A total of 8,303 visits (5.2%) resulted in referral for preoperative stress testing. Key patient factors associated with preoperative stress testing included predicted surgical risk, patient functional status, a previous diagnosis of ischemic heart disease, tobacco use, and body mass index. Patients living in either the most- or least-deprived census block groups were more likely to be tested. Patients were tested more frequently before aortic, peripheral vascular, or urologic interventions than before other surgical subcategories. Even after fully adjusting for patient and surgical factors, provider effects remained important: marginal testing rates differed by a factor-of-three in relative terms and around 2.5% in



1  
2  
3 absolute terms between the 5<sup>th</sup> and 95<sup>th</sup> percentile physicians. Stress testing frequency  
4  
5 decreased over the time period; controlling for patient and physician predictors, a visit in  
6  
7 2008 would have resulted in stress testing approximately 3.5% of the time, while a visit in  
8  
9 2018 would have resulted in stress testing approximately 1.3% of the time.  
10  
11

### 12 **Conclusions:**

13  
14  
15 In this large cohort of patients seen for preoperative risk assessment at a single health  
16  
17 system, decisions to refer patients for preoperative stress testing are influenced by various  
18  
19 factors other than estimated perioperative risk and functional status, the key  
20  
21 considerations in current guidelines. The frequency of preoperative stress testing has  
22  
23 decreased over time, but remains highly provider-dependent.  
24  
25  
26  
27  
28  
29  
30  
31  
32  
33  
34  
35  
36  
37  
38  
39  
40  
41  
42  
43  
44  
45  
46  
47  
48  
49  
50  
51  
52  
53  
54

**Strengths and limitations of this study:**

- We identified a large cohort of patients considering noncardiac surgery, with detailed clinical data from each visit.
- We tested predictor variables across various constructs potentially related to preoperative stress testing.
- We accounted for clustering by physician and patient, testing different structures in an effort to optimally partition variance.
- We used multiple imputation by chained equations to mitigate potential biases from missing data.

**Glossary of Abbreviations:**

ACC/AHA: American College of Cardiology/American Heart Association

ASA: American Society of Anesthesiologists

CAD: coronary artery disease

METs: Estimated metabolic equivalents

MICA: Myocardial infarction or cardiac arrest calculator

RCRI: Revised cardiac risk index

## Introduction

The 2014 American College of Cardiology/American Heart Association (ACC/AHA) guidelines recommend preoperative stress testing for patients whose predicted risk of a major adverse cardiac event exceeds 1% and whose functional status is poor or unknown, when results from stress testing would change clinical management.<sup>1</sup>

However, clinicians use various risk prediction tools, which identify different patients as having elevated risk.<sup>2,3</sup> Additionally, multiple methods of assessing functional status are used, which again can lead to variation in patients selected for stress testing.<sup>2,4-7</sup> Thus, the final decision to proceed with stress testing can become something closer to a provider-level judgment than a guideline-driven protocol.<sup>8</sup> Variation in use of stress testing can have substantial cost implications and potentially prompt subsequent tests and procedures with little clinical benefit.<sup>9</sup>

To understand contemporary use and drivers of preoperative cardiac stress testing, we sought to describe variation and predictors of preoperative stress testing using rich clinical data from a large integrated health system.

## Methods

The Internal Medicine Preoperative Assessment, Consultation and Treatment (IMPACT) Center assesses patients prior to noncardiac surgery at the Cleveland Clinic. In the years

1  
2  
3 from 2008 through 2018, 118,552 patients were seen in our clinic by 104 physicians across  
4  
5 159,795 visits. Among this cohort, we identified scheduled and completed preoperative  
6  
7 cardiac stress tests, here defined as those within the 30 days after a clinic visit and before  
8  
9 noncardiac surgery. This study was approved by the Cleveland Clinic Institutional Review  
10  
11 Board (IRB #18-1076).  
12  
13  
14  
15

16  
17 Natural language processing was performed in python (version 3.7.8) using regular  
18  
19 expressions and the spacy.io library (version 2.3.2). All analyses were performed in Stata  
20  
21 (version 14; College Station, TX). Data used are from our electronic health record and are  
22  
23 not available for outside access.  
24  
25  
26  
27  
28  
29

### 30 *Predictor variables*

31  
32 We theorized that six underlying constructs would be related to stress test ordering:  
33  
34 predicted perioperative risk, functional status, social and financial support, medical  
35  
36 comorbidities, physician tendencies and experience, and time. We created a random  
37  
38 effects logit model for each construct to refine variables included in our final model.  
39  
40 Within each submodel, we pruned variables according to Bayesian information criteria  
41  
42 (BIC). For continuous variables, we assessed for nonlinear or categorical relationships  
43  
44 using visual examination of binned scatter plots. To avoid overfitting, we limited  
45  
46 candidate predictors to fewer than 1 predictor variable per 15 preoperative stress tests,  
47  
48 including tested interactions, nonlinear effects, and discarded predictors. We estimated  
49  
50  
51  
52  
53  
54

55  
56 6  
57  
58  
59  
60

1  
2  
3 that we had approximately 539 degrees of freedom for analysis, with fewer for cluster-  
4  
5 level variables depending on model structure (described below).  
6  
7

8  
9  
10 For measures of perioperative risk, we tested Revised Cardiac Risk Index (RCRI),  
11  
12 Myocardial Infarction or Cardiac Arrest (MICA), and MICA's categorization of surgeries  
13  
14 using a previously-published crosswalk.<sup>2,10,11</sup> (Although different procedures likely have  
15  
16 different intrinsic cardiac risk, we used the MICA categorization of surgeries to avoid  
17  
18 overfitting.<sup>11,12</sup>) Upon finding that few surgical categories were associated with different  
19  
20 stress testing rates, we replaced that multinomial variable with indicator variables for  
21  
22 each category associated with different testing rates in our data (aortic, peripheral  
23  
24 vascular, and urologic surgeries). As a separate sensitivity analysis, we excluded patients  
25  
26 seen in advance of cardiac or vascular surgery, who are generally evaluated elsewhere in  
27  
28 our institution. We tested both documented and calculated RCRI, which may differ for a  
29  
30 variety of reasons including lab results between the clinic visit and documentation,  
31  
32 erroneous diagnoses/chart lore, outside records unavailable in the electronic medical  
33  
34 record, and misconceptions about how RCRI is calculated. We treated both estimates of  
35  
36 RCRI as continuous to force a monotonic relationship (no theory would support lower  
37  
38 testing rates at higher predicted cardiac risk). We tested MICA-predicted probability both  
39  
40 as a continuous variable and dichotomized at 1%. Although we used the American Society  
41  
42 of Anesthesiologists (ASA) physical status to calculate MICA, we did not test that  
43  
44 separately because it is assigned at the time of surgery.  
45  
46  
47  
48  
49  
50  
51  
52  
53  
54  
55  
56  
57  
58  
59  
60

7

1  
2  
3  
4  
5  
6 For measures of functional status, we tested estimated metabolic equivalents (METs),  
7  
8 which in this clinic is based on a semi-quantitative questionnaire, and the physician's  
9  
10 subjective global assessment of function, which is comparable to the Eastern Cooperative  
11  
12 Oncology Group (ECOG) score.<sup>13</sup> For measures of social and financial support, we tested  
13  
14 area deprivation index (a measure of socioeconomic disadvantage based on education,  
15  
16 employment, housing quality, and poverty measures by census block group), race,  
17  
18 ethnicity, marital status, and age (here dichotomized at age 65 to reflect changes in access  
19  
20 to care with universal Medicare eligibility).<sup>14</sup> For measures of medical comorbidities and  
21  
22 illness, we considered age, vital signs at the clinic visit, diagnoses of coronary artery  
23  
24 disease, cerebrovascular disease, or congestive heart failure, diabetes, use of insulin,  
25  
26 creatinine, tobacco use, and predicted probability of obstructive coronary artery disease.<sup>15</sup>  
27  
28  
29  
30  
31  
32  
33  
34

35 To accurately capture the predicted probability of obstructive coronary artery disease  
36  
37 among patients without an existing diagnosis, we applied natural language processing to  
38  
39 extract three pain characteristics from the full-text clinic note, when patients were  
40  
41 documented to have chest pain: (1) substernal, (2) provoked by exertion, and (3) relieved  
42  
43 by either rest or nitroglycerin. Notes with all three chest pain criteria were considered to  
44  
45 document "typical" chest pain, notes with two criteria were considered to document  
46  
47 "atypical" chest pain, and other documentation of chest pain was considered to represent  
48  
49 non-specific chest pain.<sup>15</sup> For visits without documented chest pain, we estimated pretest  
50  
51  
52  
53  
54  
55  
56  
57  
58  
59  
60

8

1  
2  
3 probability as though patients had non-specific chest pain. We used an interaction with  
4  
5 our variable for a previous diagnosis of coronary artery disease, such that this estimated  
6  
7 probability was considered a predictor only when patients did not have an existing  
8  
9 diagnosis.  
10  
11  
12  
13  
14

15 For measures of physician tendencies and experience, we tested (on the date of each visit)  
16  
17 years of post-residency practice (a proxy for overall experience) and the number of  
18  
19 previous encounters the physician had completed in our dataset (a proxy for experience  
20  
21 in preoperative risk assessment more specifically). For measures of time, we theorized  
22  
23 that patients who had previous cardiac stress tests would be less likely to be referred for  
24  
25 preoperative stress testing, and that physicians would give greater weight to more recent  
26  
27 tests (i.e., the relationship would be time-dependent). We used the date of the visit as a  
28  
29 continuous variable to test for changing stress test rates over time. To assess for changes  
30  
31 related to publication of the current ACC/AHA guideline, we created a dichotomous  
32  
33 variable for whether the visit occurred before or after said guideline's December 9, 2014  
34  
35 publication, and tested for interactions between that term and other predictors.<sup>1</sup>  
36  
37  
38  
39  
40  
41  
42  
43  
44

45 Because unstable angina would be a potential indication for cardiac testing regardless of  
46  
47 upcoming surgery, we investigated the frequency of angina in a subset of notes between  
48  
49 June 2013 and July 2016; an EHR template used during this period included a structured  
50  
51 questionnaire of symptoms. One such symptom was "Angina within 30 days".  
52  
53  
54

55  
56  
57  
58  
59  
60  
9

### *Model structure*

Conceptually, visits could be thought of as clustered by patient (with physician-level variables at the level of the visit) or by physician (with patient-level variables at the level of the visit). We tested different structures using empty models and calculated intraclass correlation coefficients to estimate the proportion of variance explained by unmeasured patient-level or physician-level factors.

With visits clustered by physician, approximately 0.4% of variance in stress test ordering was at the level of the physician. When we clustered visits by patient, approximately 4.9% of variance in stress test ordering was at the level of the patient. We therefore developed our model using physician- and visit-level variables clustered by patient, including physician ID as a visit-level indicator (“dummy”) variable. This approach drops some low volume providers for whom outcomes are overfitted but should capture more unmeasured variance at both the patient and provider levels.

### *Multivariable modeling*

Finally, we added the remaining predictor variables from each submodel into a multivariable logistic regression model. We again pruned predictors based on BIC and examined for nonlinear or categorical relationships. We revisited our model structure using the final predictor variables, comparing models clustered by patient or physician



1  
2  
3 based on BIC.  
4  
5  
6  
7

8 Because results of a multilevel logistic regression with interaction terms have limited  
9 intuitive meaning, we calculated marginal effects for reporting. Holding all other  
10 variables at their medians, we estimated the effect of changing one predictor variable at a  
11 time.  
12  
13  
14  
15  
16  
17  
18  
19

### 20 *Data extraction and missingness*

21  
22 Our methods for extracting data from the electronic medical record have been described  
23 previously.<sup>16</sup> We considered patients as having each considered diagnosis if it had been  
24 documented at any time before or at the analyzed visit. For creatinine and other lab  
25 testing, we used the most recent measurement up to and including the day of the clinic  
26 visit. We used multiple imputation by chained equations to address missing data and  
27 previously described standards to ensure multiple imputation did not introduce Monte  
28 Carlo error.<sup>17</sup> We imputed predictor variables other than those with negligible missing  
29 data: age, sex, vital signs, and binary variables indicating previous diagnoses.  
30  
31  
32  
33  
34  
35  
36  
37  
38  
39  
40  
41  
42  
43  
44

### 45 *Patient and Public Involvement*

46  
47 Patients were not involved in the design of this study.  
48  
49  
50  
51

## 52 **Results**

53  
54  
55 11  
56  
57  
58  
59  
60

1  
2  
3 Overall, 5.2% of visits to the preoperative clinic led to a cancelled or completed  
4 preoperative stress test (8,303/159,795), with 5.1% (8,085; 97.4% of those referred)  
5  
6 completing the test. Patient demographics, selected risk factors, and proportions of  
7  
8 missing data are shown in Tables 1 and 2. Unadjusted physician referral rates are shown in  
9  
10  
11  
12  
13 Figure 1.

14  
15  
16  
17  
18 Marginal testing rates across each predictor variable, with other variables at their  
19  
20 respective medians, are shown in Table 3. In general, patients were more likely to be  
21  
22 referred for preoperative stress testing as estimated perioperative risk increased and for  
23  
24 specific categories of surgeries (aortic, peripheral vascular, and urologic). Of those,  
25  
26 patients undergoing aortic surgery were most likely to be referred for stress testing,  
27  
28 though our dataset included relatively few aortic surgeries and confidence intervals for  
29  
30 that predictor were wide. Even after adjusting for all other factors, different providers  
31  
32 were more likely to refer for preoperative stress testing than others: a visit to the 95<sup>th</sup>  
33  
34 percentile physician in this clinic would result in stress testing 3.8% of the time, while a  
35  
36 visit to the 5<sup>th</sup> percentile physician in this clinic would result in testing around 1.2% of the  
37  
38  
39  
40  
41  
42  
43  
44  
45  
46  
47  
48  
49  
50  
51  
52  
53  
54  
55  
56  
57  
58  
59  
60  
time.

51  
52  
53  
54  
55  
56  
57  
58  
59  
60  
Other important patient variables included the physician's subjective assessment of  
global patient function, METs, socioeconomic advantage or disadvantage compared to  
the median, BMI, diastolic blood pressure, existing diagnoses of ischemic heart disease or

1  
2  
3 congestive heart failure, estimated probability of obstructive coronary artery disease, and  
4 tobacco use. Visits later in our dataset were less likely to result in a preoperative stress  
5 test compared with earlier visits. Each of these variables, while significant, appeared to  
6 exert less influence than surgical categories, estimated surgical risk, and provider. Fully  
7 adjusted provider marginal rates are shown in Figure 2.  
8  
9  
10  
11  
12  
13  
14  
15  
16  
17

18 Results were very similar for models clustered by patient or physician. Information  
19 criteria would slightly favor a model clustered by physician (BIC: 51040) compared to a  
20 model clustered by patient with a physician indicator variable (BIC: 52009). Meanwhile,  
21 the model clustered by physician had a slightly lower  $R^2$  (0.1896) compared with a model  
22 clustered by patient with physician as an indicator variable (0.1907).  
23  
24  
25  
26  
27  
28  
29  
30  
31

32 Between June 2013 and July 2016, 23,034 visits used our EHR template that included  
33 structured entry of “Angina within 30 days”. Of those, 48 (0.2%) were marked as “Yes”. Of  
34 107 other visits flagged by natural language processing as potentially including unstable  
35 angina, manual chart review of a random sample of 50 visits showed 3 negations missed  
36 by natural language processing, 32 descriptions of historical symptoms that had prompted  
37 testing or intervention previously, 2 quotations of test reports (coronary catheterization  
38 reports that included unstable angina as the indication for testing), and 13 cases of  
39 unstable angina.  
40  
41  
42  
43  
44  
45  
46  
47  
48  
49  
50  
51  
52  
53  
54

## Discussion

In this cohort of patients seen for preoperative risk assessment at a single health system, we have identified key drivers of preoperative stress testing, which include type of surgery, estimated surgical risk, and patient functional status. Our results demonstrate use of preoperative stress testing in a real-world cohort.

Current guidelines recommend preoperative stress testing for patients whose predicted perioperative adverse cardiac event risk exceeds 1% and whose functional capacity is poor or unknown, when such testing would change clinical management. Although we cannot determine from these data whether physicians thought testing would change management, and predicted surgical risk scores have poor concordance across the 1% threshold, patients able to perform four or more metabolic equivalents of activity made up nearly one-third of all stress test referrals.<sup>2,10,18</sup> Our data suggest that a substantial fraction of preoperative stress tests were inconsistent with current guidance.

Predicted surgical risk was nonetheless a key driver of preoperative stress testing. Testing rates increased with increasing RCRI, without a clear dichotomization at any particular value of RCRI. And interestingly, although MICA was essentially never documented, a MICA-predicted surgical risk of greater than 1% appears to be a better single predictor variable than RCRI. Physicians could be trying to incorporate the guideline-recommended threshold into their decision-making while relying on cohorts with

1  
2  
3 different calibration, or could be deliberately avoiding a stark dichotomization of risk at  
4  
5 1%.<sup>10,18</sup>  
6  
7  
8  
9

10 As with predicted surgical risk, physicians appeared to consider functional status as  
11 something between the dichotomy of current guidance and continuum of risk  
12 encountered in clinical practice. Testing rates were higher among less functional patients  
13 and lower among patients able to achieve higher METs, but neither were especially  
14 important predictors in our model. It seems probable that both clinical skill and clinical  
15 decision-making are more nuanced than we can discern from our data source. For  
16 example, physicians likely vary in both their ability to elicit anginal equivalents and their  
17 interpretation of potentially ambiguous symptoms. And even if they were presented with  
18 equivalent information, various physicians might reasonably make different decisions  
19 about testing based on factors we are not able to investigate. For example, physicians  
20 could reasonably be more inclined to test before a pancreaticoduodenectomy than a  
21 laparoscopic cholecystectomy in view of those procedures' very different metabolic  
22 demands, but we lack sufficient power to test individual surgical procedures without  
23 overfitting.<sup>12</sup> In any case, functional status and patient variables other than predicted  
24 perioperative risk explained little variance in testing rates.  
25  
26  
27  
28  
29  
30  
31  
32  
33  
34  
35  
36  
37  
38  
39  
40  
41  
42  
43  
44  
45  
46  
47  
48  
49

50 Surgical category also offers insights into testing rationale. Patients were tested more  
51 frequently before aortic or peripheral vascular interventions, perhaps reflecting persistent  
52  
53  
54

55 15  
56  
57  
58  
59  
60

1  
2  
3 beliefs that patients with coronary artery disease should be identified and revascularized  
4  
5 before vascular surgery.<sup>19-21</sup> However, patients undergoing vascular surgery are generally  
6  
7 evaluated elsewhere at our institution, leaving our sample small and confidence intervals  
8  
9 wide. We also note that patients are more likely to be referred for stress testing before  
10  
11 urologic surgery, after controlling for patient risk factors and despite the fact that  
12  
13 urologic procedures are not associated with higher intrinsic cardiac risk than other  
14  
15 common surgical categories. Anecdotally, physicians practicing in this clinic have  
16  
17 reported that a number of urologists at our institution are reluctant to operate on high-  
18  
19 risk patients unless those patients first undergo preoperative testing. While investigating  
20  
21 such a hypothesis would require a different approach than ours, clearly every physician in  
22  
23 a preoperative clinic functions within a larger system of care and must build consensus  
24  
25 among a team of treating physicians.  
26  
27  
28  
29  
30  
31  
32  
33  
34

35 Other significant predictor variables include tobacco use, BMI, diastolic blood pressure,  
36  
37 ischemic heart disease, and a patient's census block group. Because each of these are  
38  
39 correlated with risk of obstructive coronary artery disease, one possibility is that data  
40  
41 unavailable to us (such as outside records) led to some portion of the preoperative stress  
42  
43 testing we observed. Although that remains possible, multiple observations argue against  
44  
45 a simple explanation that these variables are proxies for coronary disease risk. First,  
46  
47 higher probability of obstructive coronary artery disease, calculated based on available  
48  
49 data, was associated with lower likelihood of preoperative testing. Second, patients  
50  
51  
52  
53  
54

1  
2  
3 residing in the wealthiest and poorest census tracts were approximately as likely to be  
4 referred for stress testing, with patients in the middle of the socioeconomic range less  
5 likely. Finally, diabetes was not associated with testing. It would seem that either  
6 physicians in our dataset did not incorporate patients' pretest probability of obstructive  
7 coronary disease in their decision to refer for testing, or that their assessments were  
8 poorly calibrated.  
9

10 Angina or its equivalents do not appear to be a frequent rationale for testing in this  
11 cohort. Around 0.2% of notes that used a templated review of pertinent symptoms noted  
12 angina within 30 days, parsing of free text notes did not identify unstable angina with  
13 appreciable frequency, and many cases identified through natural language processing  
14 appeared not to be unstable angina on manual chart review of sampled visits. Although  
15 this could represent a failure to document findings that were present during the visit, it  
16 would seem more likely that a preoperative visit before elective noncardiac surgery is an  
17 inefficient tool to screen for angina.  
18  
19

20 The frequency of stress testing declined over time in our dataset, in contrast with  
21 increasing testing rates suggested in other contexts.<sup>22,23</sup> A recent cross-sectional analysis  
22 of claims data from patients who had total hip or knee arthroplasty also identified  
23 decreasing testing frequency over a similar period.<sup>24</sup> Our cohort study begins with a visit  
24 to a preoperative risk assessment clinic, incorporates detailed clinical data, and is not  
25  
26  
27  
28  
29  
30  
31  
32  
33  
34  
35  
36  
37  
38  
39  
40  
41  
42  
43  
44  
45  
46  
47  
48  
49  
50  
51  
52  
53  
54

1  
2  
3 limited to patients who have completed orthopedic surgery. Our analysis thus extends  
4  
5 previous understanding by showing that the reduction is not limited to orthopedic  
6  
7 procedures, not a result of selecting patients not referred for stress testing for elective  
8  
9 surgery, and not consequent to lower predicted cardiac risk. Taken together, these two  
10  
11 analyses with different limitations suggest a shift in practice away from preoperative  
12  
13 cardiac stress testing. Neither analysis suggests a clear change in testing frequency after  
14  
15 the release of current guidelines. Although there can certainly be time lags between  
16  
17 publication and consequent practice change, our findings argue against a causal  
18  
19 relationship between publication of the current guideline and near-term changes in  
20  
21 testing rates.<sup>25</sup>  
22  
23  
24  
25  
26  
27  
28  
29

30 Our model demonstrates physician practice variation: with all other predictors held at  
31  
32 their medians, the 95<sup>th</sup> percentile physician was around three times more likely to order  
33  
34 preoperative stress testing than the 5<sup>th</sup> percentile physician. But we caution against using  
35  
36 our results, or others, for profiling individual providers, which is generally a low-  
37  
38 reliability exercise and prone to gaming.<sup>26</sup> Our dataset is among the largest clinical  
39  
40 datasets of preoperative risk assessment, but true outliers are rare and most physicians  
41  
42 are not detectably different from the mean after adjustment (see Figure 2). As with other  
43  
44 observations of physician practice variation, ours suggests a deeper failure: that we do not  
45  
46 yet understand how best to use preoperative stress testing to mitigate perioperative  
47  
48 cardiac risk.<sup>27</sup>  
49  
50  
51  
52  
53  
54



1  
2  
3  
4  
5  
6 Surgery carries inherent cardiac risk, and stress testing may reflect physician discomfort  
7  
8 with the malpractice or cognitive liabilities that cardiac risk entails.<sup>28-32</sup> Stress testing can  
9  
10 inform diagnosis and prognosis, but outcomes will only improve if testing results in  
11  
12 interventions that reduce perioperative risk. Such interventions have proven elusive:  
13  
14 preoperative revascularization did not reduce cardiac risk in the largest randomized trial  
15  
16 to date, beta blockers are more likely harmful than helpful, and other interventions (e.g.,  
17  
18 statins) that may be allocated differently based on stress testing likely have modest  
19  
20 effects, if any.<sup>33-36</sup> Intraoperative care or postoperative testing patterns could differ based  
21  
22 on whether a preoperative stress test was performed, but what practices in those settings  
23  
24 might reduce the risk of major adverse cardiac events remain equally unclear. While  
25  
26 estimated perioperative cardiac risk appears to drive stress testing, it remains to be seen  
27  
28 how stress testing might reduce perioperative cardiac risk.  
29  
30  
31  
32  
33  
34  
35  
36

37 Although we have made every effort to ensure the internal validity of our data, analysis,  
38  
39 and results, our data may not adequately represent drivers of or variation in preoperative  
40  
41 stress testing before some common types of surgery, including ophthalmologic surgery,  
42  
43 which is evaluated elsewhere in our institution.<sup>37</sup> Our IMPACT clinic has made  
44  
45 substantial efforts to provide uniform care, which could have reduced physician variation  
46  
47 in our dataset, and we cannot analyze variation across health system or region, which can  
48  
49 also be substantial.<sup>38</sup> As with any single-center study, results should be extrapolated to  
50  
51  
52  
53  
54

1  
2  
3 other settings with caution. For example, we observed higher testing frequency before  
4 urologic surgery than would be expected for cardiac risk; other centers may have different  
5 surgical categories with testing out of proportion to surgical risk. The need to build a  
6 consensus plan of care among a treatment team is true across institutions, but the  
7 particulars of our institution's consensus may not be.  
8  
9  
10  
11  
12  
13  
14  
15  
16  
17

18 Additionally, as with other observational studies, our analytical choices are difficult to  
19 separate from our theoretical framework, and may influence our results in various ways.<sup>39</sup>  
20 For example, we rejected physician experience as a predictor of testing in favor of a  
21 random effect for each physician and the date of each visit due to our prespecified  
22 analytic criteria (rejecting predictor variables that worsened AIC and BIC). Still,  
23 experience differs by physician and necessarily accrues over time. A reasonable  
24 investigator with a different theoretical model could assume broadly stable testing rates  
25 over time and conclude that testing decreases as physicians gain experience (see  
26 Supplemental Appendix). Time in particular is rife with potential confounders of this sort.  
27 Recent work using other datasets also identified reduced stress testing over time  
28 (described above), offering reassurance that our analytic criteria led to the best  
29 conclusion. Still, the effect of experience on appropriate testing could be an avenue for  
30 further investigation.  
31  
32  
33  
34  
35  
36  
37  
38  
39  
40  
41  
42  
43  
44  
45  
46  
47  
48  
49  
50  
51

52 But while the limitations of our study reflect the limitations of any single center  
53  
54

1  
2  
3 observational study, the detailed clinical data available to us offers distinct advantages  
4  
5 over earlier work. We have demonstrated real-world use of preoperative stress testing  
6  
7 before a wide range of possible surgical interventions, using visit-level data to  
8  
9 comprehensively assess variation in and predictors of preoperative cardiac stress testing.  
10  
11  
12  
13  
14

15 In summary, the frequency of preoperative stress testing varied with estimated surgical  
16  
17 risk, patient functional status, socioeconomic status, ischemic heart disease, congestive  
18  
19 heart failure, body mass index, diastolic blood pressure, surgical category, and provider.  
20  
21 The fraction of patients referred for stress testing appears to be declining over time, but  
22  
23 testing remains common and highly dependent on the provider. The value of  
24  
25 preoperative stress testing remains to be established.  
26  
27  
28  
29  
30  
31  
32  
33  
34  
35  
36  
37  
38  
39  
40  
41  
42  
43  
44  
45  
46  
47  
48  
49  
50  
51  
52  
53  
54

**Funding Sources:**

This work was funded by NHLBI 1Ko8HL141598.

**Conflict of Interest Disclosures:**

None

**Author Contributions:**

Dr. Pappas: This author conceived the study, collected the data, performed the analysis, and wrote the initial draft of the manuscript.

Dr. Sessler: This author helped improve the analysis and revised the manuscript.

Dr. Auerbach: This author helped improve the analysis and revised the manuscript.

Dr. Kattan: This author helped improve the analysis and revised the manuscript.

Mr. Milinovich: This author helped obtain and validate data.

Dr. Blackstone: This author helped improve the analysis and revised the manuscript.

Dr. Rothberg: This author helped improve the analysis and revised the manuscript.

**Ethical Approval:**

This study was approved by the Cleveland Clinic Institutional Review Board (IRB #18-1076).

**Data Availability Statement**

Data used are from our electronic health record and are not available for outside access.

## References

1. Fleisher LA, Fleischmann KE, Auerbach AD, et al. 2014 ACC/AHA guideline on perioperative cardiovascular evaluation and management of patients undergoing noncardiac surgery: executive summary: a report of the American College of Cardiology/American Heart Association Task Force on Practice Guidelines. *Circulation*. 2014;130(24):2215-2245. doi:10.1161/CIR.000000000000105
2. Pappas MA, Sessler DI, Rothberg MB. Anticipated Rates and Costs of Guideline-Concordant Preoperative Stress Testing. *Anesth Analg*. 2019;128(2):241-246. doi:10.1213/ANE.0000000000003754
3. Glance LG, Faden E, Dutton RP, et al. Impact of the choice of risk model for identifying low-risk patients using the 2014 American college of cardiology/American Heart Association perioperative guidelines. *Anesthesiology*. 2018;129(5):889-900. doi:10.1097/ALN.0000000000002341
4. Hlatky MA, Boineau RE, Higginbotham MB, et al. A brief self-administered questionnaire to determine functional capacity (The Duke Activity Status Index). *Am J Cardiol*. 1989;64(10):651-654. doi:10.1016/0002-9149(89)90496-7
5. Reilly DF, McNeely MJ, Doerner D, et al. Self-reported exercise tolerance and the risk of serious perioperative complications. *Arch Intern Med*. 1999;159(18):2185-2192. doi:10.1001/archinte.159.18.2185
6. Melon CC, Eshtiaghi P, Luksun WJ, Wijesundera DN. Validated questionnaire vs physicians' judgment to estimate preoperative exercise capacity. *JAMA Intern Med*.

- 2014;174(9):1507-1508. doi:10.1001/jamainternmed.2014.2914
7. Wijesundera DN, Pearse RM, Shulman MA, et al. Assessment of functional capacity before major non-cardiac surgery: an international, prospective cohort study. *Lancet*. 2018;391(10140):2631-2640. doi:10.1016/S0140-6736(18)31131-0
8. Eddy DM. Variations in physician practice: The role of uncertainty. *Health Aff*. 1984;3(2):74-89. doi:10.1377/hlthaff.3.2.74
9. Mark DB, Federspiel JJ, Cowper PA, et al. Economic Outcomes With Anatomical Versus Functional Diagnostic Testing for Coronary Artery Disease. *Ann Intern Med*. 2016;165(2):94-102. doi:10.7326/M15-2639
10. Lee TH, Marcantonio ER, Mangione CM, et al. Derivation and prospective validation of a simple index for prediction of cardiac risk of major noncardiac surgery. *Circulation*. 1999;100(10):1043-1049. doi:10.1161/01.CIR.100.10.1043
11. Gupta PK, Gupta H, Sundaram A, et al. Development and validation of a risk calculator for prediction of cardiac risk after surgery. *Circulation*. 2011;124(4):381-387. doi:10.1161/CIRCULATIONAHA.110.015701
12. Liu JB, Liu Y, Cohen ME, Ko CY, Sweitzer BJ. Defining the Intrinsic Cardiac Risks of Operations to Improve Preoperative Cardiac Risk Assessments. *Anesthesiology*. 2018;128(2):283-292. doi:10.1097/ALN.0000000000002024
13. Oken MM, Creech RH, Davis TE. Toxicology and response criteria of the Eastern Cooperative Oncology Group. *Am J Clin Oncol*. 1982;5(6):649-655. doi:10.1097/00000421-198212000-00014

- 1  
2  
3 14. Kind AJH, Buckingham WR. Making neighborhood-disadvantage metrics accessible  
4  
5 - The neighborhood atlas. *N Engl J Med*. 2018;378(26):2456-2458.  
6  
7  
8 doi:10.1056/NEJMp1802313  
9
- 10 15. Genders TSS, Steyerberg EW, Hunink MGM, et al. Prediction model to estimate  
11  
12 presence of coronary artery disease: Retrospective pooled analysis of existing  
13  
14 cohorts. *BMJ*. 2012;344(7862). doi:10.1136/bmj.e3485  
15  
16  
17
- 18 16. Milinovich A, Kattan MW. Extracting and utilizing electronic health data from Epic  
19  
20 for research. *Ann Transl Med*. 2018;6(3):42-42. doi:10.21037/atm.2018.01.13  
21  
22
- 23 17. White IR, Royston P, Wood AM. Multiple imputation using chained equations:  
24  
25 Issues and guidance for practice. *Stat Med*. 2011;30(4):377-399. doi:10.1002/sim.4067  
26  
27
- 28 18. Duceppe E, Parlow J, MacDonald P, et al. Canadian Cardiovascular Society  
29  
30 Guidelines on Perioperative Cardiac Risk Assessment and Management for Patients  
31  
32 Who Undergo Noncardiac Surgery. *Can J Cardiol*. 2017;33(1):17-32.  
33  
34  
35 doi:10.1016/j.cjca.2016.09.008  
36
- 37 19. Eagle KA, Singer DE, Brewster DC, Darling RC, Mulley AG, Boucher CA.  
38  
39 Dipyridamole-thallium scanning in patients undergoing vascular surgery.  
40  
41 Optimizing preoperative evaluation of cardiac risk. *JAMA*. 1987;257(16):2185-2189.  
42  
43  
44  
45 <http://www.ncbi.nlm.nih.gov/pubmed/3560400>. Accessed November 11, 2019.  
46
- 47 20. Hertzner NR, Beven EG, Young JR, et al. Coronary artery disease in peripheral  
48  
49 vascular patients. A classification of 1000 coronary angiograms and results of  
50  
51 surgical management. *Ann Surg*. 1984;199(2):223-233. doi:10.1097/00000658-

25

- 1  
2  
3 198402000-00016  
4  
5  
6 21. Boucher CA, Brewster DC, Darling RC, Okada RD, Strauss HW, Pohost GM.  
7  
8 Determination of Cardiac Risk by Dipyridamole-Thallium Imaging before  
9  
10 Peripheral Vascular Surgery. *N Engl J Med.* 1985;312(7):389-394.  
11  
12 doi:10.1056/NEJM198502143120701  
13  
14  
15 22. Sheffield KM, McAdams PS, Benarroch-Gampel J, et al. Overuse of preoperative  
16  
17 cardiac stress testing in medicare patients undergoing elective noncardiac surgery.  
18  
19 *Ann Surg.* 2013;257(1):73-80. doi:10.1097/SLA.0b013e31826bc2f4  
20  
21  
22 23. Sigmund AE, Stevens ER, Blitz JD, Ladapo JA. Use of preoperative testing and  
23  
24 physicians' response to professional society guidance. *JAMA Intern Med.*  
25  
26 2015;175(8):1352-1359. doi:10.1001/jamainternmed.2015.2081  
27  
28  
29 24. Rubin DS, Hughey R, Gerlach RM, Ham SA, Ward RP, Nagele P. Frequency and  
30  
31 Outcomes of Preoperative Stress Testing in Total Hip and Knee Arthroplasty from  
32  
33 2004 to 2017. *JAMA Cardiol.* 2021;6(1):13-20. doi:10.1001/jamacardio.2020.4311  
34  
35  
36 25. Institute of Medicine. *Crossing the Quality Chasm: A New Health System for the 21st*  
37  
38 *Century.* Washington, DC: The National Academies Press; 2001. doi:10.17226/10027  
39  
40  
41 26. Hofer TP, Hayward RA, Greenfield S, Wagner EH, Kaplan SH, Manning WG. The  
42  
43 unreliability of individual physician "report cards" for assessing the costs and  
44  
45 quality of care of a chronic disease. *J Am Med Assoc.* 1999;281(22):2098-2105.  
46  
47  
48 doi:10.1001/jama.281.22.2098  
49  
50  
51 27. Wennberg JE, Freeman JL, Culp WJ. Are Hospital Services Rationed in New Haven  
52  
53  
54

26



- 1  
2  
3 or Over-Utilized in Boston? *Lancet*. 1987;329(8543):1185-1189. doi:10.1016/S0140-  
4  
5  
6 6736(87)92152-0  
7
- 8 28. Saint S, Vaughn VM, Chopra V, Fowler KE, Kachalia A. Perception of Resources  
9  
10 Spent on Defensive Medicine and History of Being Sued Among Hospitalists:  
11  
12 Results from a National Survey. *J Hosp Med*. 2018;13(1):26-29. doi:10.12788/jhm.2800  
13  
14
- 15 29. Feinstein AR. The 'Chagrin Factor' and Qualitative Decision Analysis. *Arch Intern*  
16  
17 *Med*. 1985;145(7):1257-1259. doi:10.1001/archinte.1985.00360070137023  
18  
19
- 20 30. Rolfe A, Burton C. Reassurance after Diagnostic Testing with a Low Pretest  
21  
22 Probability of Serious Disease: Systematic Review and Meta-analysis. *JAMA Intern*  
23  
24 *Med*. 2013;173(6):407-416. doi:10.1001/jamainternmed.2013.2762  
25  
26
- 27 31. Van der Weijden T, Van Velsen M, Dinant GJ, Van Hasselt CM, Grol R.  
28  
29 Unexplained complaints in general practice: Prevalence, patients' expectations, and  
30  
31 professionals' test-ordering behavior. *Med Decis Mak*. 2003;23(3):226-231.  
32  
33  
34 doi:10.1177/0272989X03023003004  
35  
36
- 37 32. Little P, Dorward M, Warner G, Stephens K, Senior J, Moore M. Importance of  
38  
39 patient pressure and perceived pressure and perceived medical need for  
40  
41 investigations, referral, and prescribing in primary care: Nested observational  
42  
43 study. *Br Med J*. 2004;328(7437):444-446. doi:10.1136/bmj.328013.644086.7c  
44  
45  
46
- 47 33. McFalls EO, Ward HB, Moritz TE, et al. Coronary-Artery Revascularization before  
48  
49 Elective Major Vascular Surgery. *N Engl J Med*. 2004;351(27):2795-2804.  
50  
51  
52 doi:10.1056/NEJMoa041905  
53  
54

- 1  
2  
3 34. Blessberger H, Kammler J, Domanovits H, et al. Perioperative beta-blockers for  
4 preventing surgery-related mortality and morbidity. *Cochrane Database Syst Rev*.  
5  
6 March 2018. doi:10.1002/14651858.CD004476.pub3  
7  
8  
9  
10 35. Berwanger O, Manach Y Le, Suzumura EA, et al. Association between pre-operative  
11  
12 statin use and major cardiovascular complications among patients undergoing non-  
13  
14 cardiac surgery: The VISION study. *Eur Heart J*. 2016;37(2):177-185.  
15  
16 doi:10.1093/eurheartj/ehv456  
17  
18  
19  
20 36. Berwanger O, de Barros e Silva PGM, Barbosa RR, et al. Atorvastatin for high-risk  
21  
22 statin-naïve patients undergoing noncardiac surgery: The Lowering the Risk of  
23  
24 Operative Complications Using Atorvastatin Loading Dose (LOAD) randomized  
25  
26 trial. *Am Heart J*. 2017;184:88-96. doi:10.1016/j.ahj.2016.11.001  
27  
28  
29  
30 37. Kerr EA, Chen J, Sussman JB, Klamerus ML, Nallamotheu BK. Stress Testing Before  
31  
32 Low-Risk Surgery: So Many Recommendations, So Little Overuse. *JAMA Intern*  
33  
34 *Med*. 2015;175(4):645. doi:10.1001/jamainternmed.2014.7877  
35  
36  
37 38. Home - Dartmouth Atlas of Health Care. <https://www.dartmouthatlas.org/>.  
38  
39 Accessed November 11, 2019.  
40  
41  
42 39. Palpacuer C, Hammas K, Duprez R, Laviolle B, Ioannidis JPA, Naudet F. Vibration  
43  
44 of effects from diverse inclusion/exclusion criteria and analytical choices: 9216  
45  
46 different ways to perform an indirect comparison meta-analysis. *BMC Med*.  
47  
48 2019;17(1):174. doi:10.1186/s12916-019-1409-3  
49  
50  
51  
52  
53  
54  
55  
56  
57  
58  
59  
60

1  
2  
3  
4  
5  
6  
7  
8  
9  
10  
11  
12  
13  
14  
15  
16  
17  
18  
19  
20  
21  
22  
23  
24  
25  
26  
27  
28  
29  
30  
31  
32  
33  
34  
35  
36  
37  
38  
39  
40  
41  
42  
43  
44  
45  
46  
47  
48  
49  
50  
51  
52  
53  
54  
55  
56  
57  
58  
59  
60

For peer review only

Table 1. Patient and Surgical Characteristics.

|                                                                   |             | Total   | Percent of category | Percent of all visits | Completed preoperative stress test | Percent of all preoperative stress tests |
|-------------------------------------------------------------------|-------------|---------|---------------------|-----------------------|------------------------------------|------------------------------------------|
| <b>Age</b>                                                        |             | 159,795 | 100.0%              | 100.0%                | 8,303                              | 100.0%                                   |
| <b>Sex</b>                                                        | Female      | 88,738  | 55.5%               | 55.5%                 | 4,079                              | 49.1%                                    |
|                                                                   | Male        | 71,055  | 44.5%               | 44.5%                 | 4,224                              | 50.9%                                    |
| <b>Previous diagnosis of ischemic heart disease</b>               | No          | 128,505 | 80.4%               | 80.4%                 | 4,831                              | 58.2%                                    |
|                                                                   | Yes         | 31,290  | 19.6%               | 19.6%                 | 3,472                              | 41.8%                                    |
| <b>Previous diagnosis of congestive heart failure</b>             | No          | 146,556 | 91.7%               | 91.7%                 | 6,922                              | 83.4%                                    |
|                                                                   | Yes         | 13,239  | 8.3%                | 8.3%                  | 1,381                              | 16.6%                                    |
| <b>Previous diagnosis of cerebrovascular disease</b>              | No          | 141,519 | 88.6%               | 88.6%                 | 6,567                              | 79.1%                                    |
|                                                                   | Yes         | 18,276  | 11.4%               | 11.4%                 | 1,736                              | 20.9%                                    |
| <b>Systolic Blood Pressure</b>                                    |             | 159,488 | 100.0%              | 99.8%                 | 8,285                              | 99.8%                                    |
| <b>Diastolic Blood Pressure</b>                                   |             | 159,481 | 100.0%              | 99.8%                 | 8,284                              | 99.8%                                    |
| <b>Body Mass Index</b>                                            |             | 157,473 | 100.0%              | 98.5%                 | 8,155                              | 98.2%                                    |
| <b>Creatinine (RCRI categorization)</b>                           | ≤ 2.0 mg/dL | 151,885 | 97.1%               | 95.1%                 | 7,695                              | 92.7%                                    |
|                                                                   | > 2.0 mg/dL | 4,487   | 2.9%                | 2.8%                  | 542                                | 6.5%                                     |
| <b>Creatinine (MICA categorization)</b>                           | ≤ 1.5 mg/dL | 144,369 | 90.3%               | 90.3%                 | 7,128                              | 85.8%                                    |
|                                                                   | > 1.5 mg/dL | 12,003  | 7.5%                | 7.5%                  | 1,109                              | 13.4%                                    |
|                                                                   | Unknown     | 3,423   | 2.1%                | 2.1%                  | 66                                 | 0.8%                                     |
| <b>Prescribed insulin</b>                                         | No          | 147,610 | 92.4%               | 92.4%                 | 7,136                              | 85.9%                                    |
|                                                                   | Yes         | 12,185  | 7.6%                | 7.6%                  | 1,167                              | 14.1%                                    |
| <b>RCRI surgical category</b>                                     | High risk   | 27,709  | 23.8%               | 17.3%                 | 872                                | 10.5%                                    |
|                                                                   | Other       | 88,929  | 76.2%               | 55.7%                 | 360                                | 4.3%                                     |
| <b>Area Deprivation Index</b>                                     |             | 126,076 | 100.0%              | 78.9%                 | 7,091                              | 85.4%                                    |
| <b>RCRI (documented)</b>                                          | 0           | 50,785  | 75.1%               | 31.8%                 | 1,548                              | 18.6%                                    |
|                                                                   | 1           | 12,642  | 18.7%               | 7.9%                  | 988                                | 11.9%                                    |
|                                                                   | 2           | 3,321   | 4.9%                | 2.1%                  | 402                                | 4.8%                                     |
|                                                                   | 3           | 742     | 1.1%                | 0.5%                  | 108                                | 1.3%                                     |
|                                                                   | 4           | 151     | 0.2%                | 0.1%                  | 21                                 | 0.3%                                     |
|                                                                   | 5           | 15      | 0.0%                | 0.0%                  | 2                                  | 0.0%                                     |
| <b>RCRI (calculated)</b>                                          | 0           | 56,879  | 52.0%               | 35.6%                 | 355                                | 4.3%                                     |
|                                                                   | 1           | 36,020  | 32.9%               | 22.5%                 | 393                                | 4.7%                                     |
|                                                                   | 2           | 11,143  | 10.2%               | 7.0%                  | 245                                | 3.0%                                     |
|                                                                   | 3           | 4,006   | 3.7%                | 2.5%                  | 98                                 | 1.2%                                     |
|                                                                   | 4           | 1,172   | 1.1%                | 0.7%                  | 33                                 | 0.4%                                     |
|                                                                   | 5           | 204     | 0.2%                | 0.1%                  | 7                                  | 0.1%                                     |
| <b>MICA risk estimate</b>                                         | ≤ 1%        | 71,448  | 44.7%               | 44.7%                 | 608                                | 7.3%                                     |
|                                                                   | > 1%        | 88,347  | 55.3%               | 55.3%                 | 7,695                              | 92.7%                                    |
| <b>Physician subjective assessment of patient global function</b> | 1           | 17,991  | 19.1%               | 11.3%                 | 489                                | 5.9%                                     |
|                                                                   | 1-2         | 13,386  | 14.2%               | 8.4%                  | 634                                | 7.6%                                     |
|                                                                   | 2           | 40,829  | 43.4%               | 25.6%                 | 1,739                              | 20.9%                                    |

|                                                      |                                            |        |         |        |        |       |        |
|------------------------------------------------------|--------------------------------------------|--------|---------|--------|--------|-------|--------|
|                                                      |                                            | 2-3    | 8,588   | 9.1%   | 5.4%   | 646   | 7.8%   |
|                                                      |                                            | 3      | 9,310   | 9.9%   | 5.8%   | 732   | 8.8%   |
|                                                      |                                            | 3-4    | 1,922   | 2.0%   | 1.2%   | 253   | 3.0%   |
|                                                      |                                            | 4      | 1,999   | 2.1%   | 1.3%   | 175   | 2.1%   |
| <b>Insurance</b>                                     | Medicare                                   |        | 20,744  | 52.2%  | 13.0%  | 1,192 | 14.4%  |
|                                                      | Medicaid                                   |        | 2,384   | 6.0%   | 1.5%   | 83    | 1.0%   |
|                                                      | Private                                    |        | 14,764  | 37.1%  | 9.2%   | 307   | 3.7%   |
|                                                      | Other listed insurer                       |        | 1,881   | 4.7%   | 1.2%   | 53    | 0.6%   |
| <b>ASA Class</b>                                     |                                            | 1      | 3,325   | 3.0%   | 2.1%   | 9     | 0.1%   |
|                                                      |                                            | 2      | 34,026  | 30.9%  | 21.3%  | 181   | 2.2%   |
|                                                      |                                            | 3      | 65,298  | 59.3%  | 40.9%  | 854   | 10.3%  |
|                                                      |                                            | 4      | 7,454   | 6.8%   | 4.7%   | 157   | 1.9%   |
| <b>MICA surgical category</b>                        | Anorectal                                  |        | 1,213   | 1.0%   | 0.8%   | 3     | 0.0%   |
|                                                      | Aortic                                     |        | 115     | 0.1%   | 0.1%   | 34    | 0.4%   |
|                                                      | Bariatric                                  |        | 703     | 0.6%   | 0.4%   | 6     | 0.1%   |
|                                                      | Brain                                      |        | 4,780   | 4.1%   | 3.0%   | 15    | 0.2%   |
|                                                      | Breast                                     |        | 8,541   | 7.4%   | 5.3%   | 17    | 0.2%   |
|                                                      | Cardiac                                    |        | 237     | 0.2%   | 0.1%   | 10    | 0.1%   |
|                                                      | Ear, nose, throat                          |        | 3,640   | 3.1%   | 2.3%   | 19    | 0.2%   |
|                                                      | Foregut/hepatopancreatobiliary             |        | 3,252   | 2.8%   | 2.0%   | 37    | 0.4%   |
|                                                      | Gallbladder, appendix, adrenals, or spleen |        | 1,974   | 1.7%   | 1.2%   | 17    | 0.2%   |
|                                                      | Gynecologic                                |        | 7,458   | 6.4%   | 4.7%   | 51    | 0.6%   |
|                                                      | Hernia                                     |        | 2,778   | 2.4%   | 1.7%   | 16    | 0.2%   |
|                                                      | Intestines                                 |        | 16,081  | 13.9%  | 10.1%  | 87    | 1.0%   |
|                                                      | Neck                                       |        | 3,076   | 2.7%   | 1.9%   | 18    | 0.2%   |
|                                                      | Nonesophageal thoracic                     |        | 290     | 0.2%   | 0.2%   | 4     | 0.0%   |
|                                                      | Orthopedic                                 |        | 26,005  | 22.4%  | 16.3%  | 208   | 2.5%   |
|                                                      | Other abdomen                              |        | 1,970   | 1.7%   | 1.2%   | 19    | 0.2%   |
|                                                      | Peripheral vascular                        |        | 1,355   | 1.2%   | 0.8%   | 110   | 1.3%   |
| Skin                                                 |                                            | 7,126  | 6.1%    | 4.5%   | 78     | 0.9%  |        |
| Spinal                                               |                                            | 11,994 | 10.3%   | 7.5%   | 59     | 0.7%  |        |
| Urologic                                             |                                            | 13,423 | 11.6%   | 8.4%   | 414    | 5.0%  |        |
| Vein                                                 |                                            | 48     | 0.0%    | 0.0%   | 3      | 0.0%  |        |
| <b>Before or after release of current guideline</b>  | Before                                     |        | 98,465  | 61.6%  | 61.6%  | 5,911 | 71.2%  |
|                                                      | After                                      |        | 61,330  | 38.4%  | 38.4%  | 2,392 | 28.8%  |
| <b>Able to perform activities of at least 4 METs</b> | No                                         |        | 90,260  | 56.5%  | 56.5%  | 5,713 | 68.8%  |
|                                                      | Yes                                        |        | 69,535  | 43.5%  | 43.5%  | 2,590 | 31.2%  |
| <b>Tobacco use</b>                                   | Current smoker                             |        | 18,806  | 12.4%  | 11.8%  | 1,028 | 12.4%  |
|                                                      | Former smoker                              |        | 62,067  | 40.9%  | 38.8%  | 3,834 | 46.2%  |
|                                                      | Never smoker                               |        | 70,966  | 46.7%  | 44.4%  | 2,976 | 35.8%  |
| <b>Probability of obstructive CAD</b>                |                                            |        | 159,793 | 100.0% | 100.0% | 8,303 | 100.0% |

Table 2: Summary of continuous variables.

|                                                      | <b>Mean ± SD</b> |
|------------------------------------------------------|------------------|
| <b>Age (years)</b>                                   | 58.8 ± 15.2      |
| <b>Systolic Blood Pressure</b>                       | 129 ± 19.1       |
| <b>Diastolic Blood Pressure</b>                      | 73 ± 11.3        |
| <b>Body Mass Index</b>                               | 30.1 ± 7.6       |
| <b>Creatinine</b>                                    | 1.02 ± 0.85      |
| <b>Area Deprivation Index</b>                        | 54.2 ± 24.6      |
| <b>Estimated METs of activity</b>                    | 5.22 ± 1.35      |
| <b>MICA risk estimate</b>                            | 0.021 ± 0.025    |
| <b>Previous patients seen by physician in clinic</b> | 1,587 ± 1,536    |
| <b>Predicted probability of obstructive CAD</b>      | 0.129 ± 0.136    |

Table 3. Marginal results for each variable in our final model, with all other variables held at their medians.

For example, with all other variables at their respective medians, a visit on June 30, 2008 would have resulted in preoperative stress testing approximately 3.5% of the time, while a visit on June 30, 2018 would have resulted in preoperative stress testing approximately 1.3% of the time. Provider effects are summarized for space considerations; full marginal results by physician are included in the Supplemental Appendix.

| Predictor                                        | Value | Marginal Rate | 95% CI    |
|--------------------------------------------------|-------|---------------|-----------|
| <b>MICA estimate &gt; 1%</b>                     | 0     | 0.6%          | 0.6% 0.7% |
|                                                  | 1     | 7.1%          | 6.7% 7.5% |
| <b>RCRI (documented)</b>                         | 0     | 2.2%          | 2.0% 2.3% |
|                                                  | 1     | 2.7%          | 2.5% 2.9% |
|                                                  | 2     | 3.4%          | 3.0% 3.8% |
|                                                  | 3     | 4.2%          | 3.5% 5.0% |
|                                                  | 4     | 5.1%          | 4.0% 6.5% |
|                                                  | 5     | 6.4%          | 4.7% 8.6% |
| <b>Subjective assessment of patient function</b> | 1     | 2.1%          | 1.9% 2.2% |
|                                                  | 2     | 2.4%          | 2.2% 2.5% |
|                                                  | 3     | 2.8%          | 2.6% 3.0% |
|                                                  | 4     | 3.2%          | 2.9% 3.5% |
| <b>Estimated METs</b>                            | 2     | 3.3%          | 2.9% 3.7% |
|                                                  | 4     | 2.7%          | 2.5% 2.9% |
|                                                  | 8     | 1.8%          | 1.6% 1.9% |
| <b>Body mass index</b>                           | 20    | 2.1%          | 1.9% 2.3% |
|                                                  | 30    | 2.4%          | 2.2% 2.5% |
|                                                  | 40    | 2.7%          | 2.5% 2.9% |
|                                                  | 70    | 2.3%          | 2.2% 2.5% |
| <b>Diastolic blood pressure</b>                  | 90    | 2.5%          | 2.3% 2.7% |
|                                                  | 110   | 2.7%          | 2.4% 3.0% |
|                                                  | No    | 2.1%          | 2.0% 2.3% |
| <b>Ischemic heart disease</b>                    | Yes   | 3.6%          | 3.3% 3.9% |
|                                                  | No    | 2.4%          | 2.2% 2.5% |

|                                                 |                     |       |      |       |
|-------------------------------------------------|---------------------|-------|------|-------|
| <b>failure</b>                                  | Yes                 | 2.1%  | 1.9% | 2.3%  |
|                                                 | 10                  | 2.8%  | 2.5% | 3.1%  |
| <b>Area deprivation index</b>                   | 50                  | 2.2%  | 2.0% | 2.3%  |
|                                                 | 90                  | 2.6%  | 2.4% | 2.8%  |
| <b>Predicted probability of obstructive CAD</b> | 5%                  | 2.6%  | 2.4% | 2.7%  |
|                                                 | 10%                 | 2.4%  | 2.3% | 2.6%  |
|                                                 | 20%                 | 2.2%  | 2.1% | 2.4%  |
| <b>Tobacco use</b>                              | Current smoker      | 2.6%  | 2.3% | 2.8%  |
|                                                 | Former smoker       | 2.5%  | 2.3% | 2.7%  |
|                                                 | Neither             | 2.2%  | 2.1% | 2.4%  |
| <b>Date</b>                                     | 2008.06.30          | 3.5%  | 3.2% | 3.8%  |
|                                                 | 2013.06.30          | 2.6%  | 2.4% | 2.8%  |
|                                                 | 2018.06.30          | 1.3%  | 1.2% | 1.4%  |
| <b>Surgical category</b>                        | Aortic              | 23.4% | 6.0% | 91.1% |
|                                                 | Peripheral vascular | 8.7%  | 6.7% | 11.3% |
|                                                 | Urologic            | 9.2%  | 8.3% | 10.2% |
|                                                 | Other               | 1.9%  | 1.7% | 2.0%  |
| <b>Physician (summary)</b>                      | Lowest              | 1.0%  | 0.1% | 4.4%  |
|                                                 | 5th percentile      | 1.2%  | 0.6% | 2.6%  |
|                                                 | Median              | 2.3%  | 2.1% | 2.6%  |
|                                                 | 95th percentile     | 3.8%  | 3.2% | 4.5%  |
|                                                 | Highest             | 6.1%  | 2.7% | 13.5% |



1  
2  
3 **Figure 1:** Unadjusted rates of preoperative stress testing, by physician.  
4  
5

6  
7 [Attached separately as Figure\_01.tif]  
8  
9  
10  
11  
12  
13  
14  
15  
16  
17  
18  
19  
20  
21  
22  
23  
24  
25  
26  
27  
28  
29  
30  
31  
32  
33  
34  
35  
36  
37  
38  
39  
40  
41  
42  
43  
44  
45  
46  
47  
48  
49  
50  
51  
52  
53  
54

55 35  
56  
57  
58  
59  
60

1  
2  
3  
4  
5  
6  
7  
8  
9  
10  
11  
12  
13  
14  
15  
16  
17  
18  
19  
20  
21  
22  
23  
24  
25  
26  
27  
28  
29  
30  
31  
32  
33  
34  
35  
36  
37  
38  
39  
40  
41  
42  
43  
44  
45  
46  
47  
48  
49  
50  
51  
52  
53  
54  
55  
56  
57  
58  
59  
60

**Figure 2:** Mean marginal rates of preoperative stress testing, by physician.

[Attached separately as Figure\_o2.tif]

For peer review only

1  
2  
3  
4  
5  
6  
7  
8  
9  
10  
11  
12  
13  
14  
15  
16  
17  
18  
19  
20  
21  
22  
23  
24  
25  
26  
27  
28  
29  
30  
31  
32  
33  
34  
35  
36  
37  
38  
39  
40  
41  
42  
43  
44  
45  
46  
47  
48  
49  
50  
51  
52  
53  
54  
55  
56  
57  
58  
59  
60

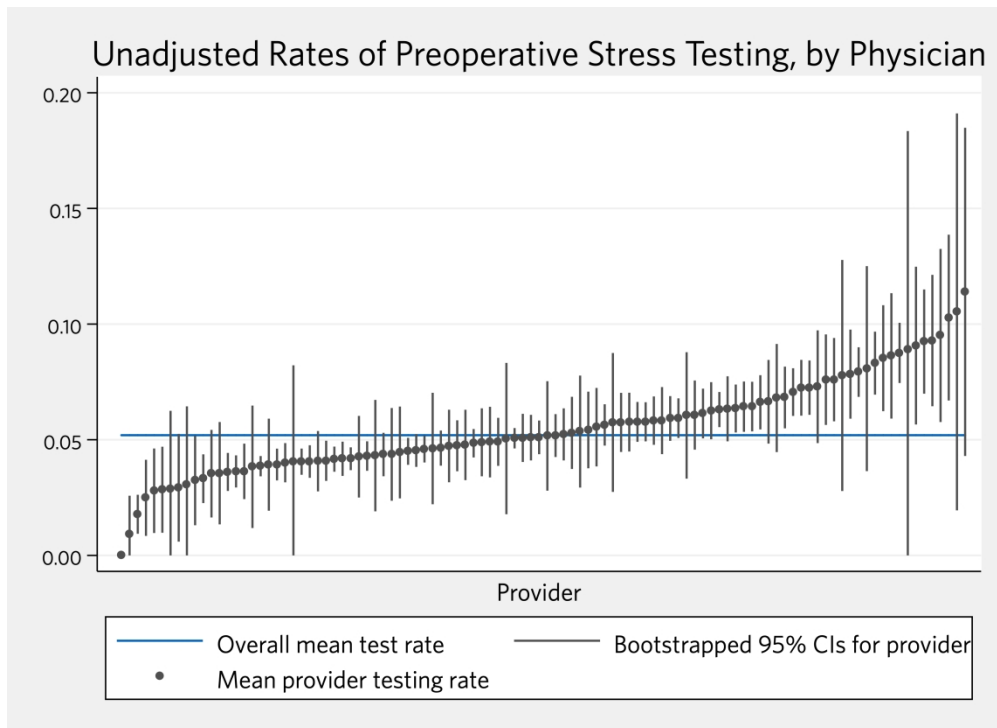

Figure 1: Unadjusted rates of preoperative stress testing, by physician

569x413mm (144 x 144 DPI)

1  
2  
3  
4  
5  
6  
7  
8  
9  
10  
11  
12  
13  
14  
15  
16  
17  
18  
19  
20  
21  
22  
23  
24  
25  
26  
27  
28  
29  
30  
31  
32  
33  
34  
35  
36  
37  
38  
39  
40  
41  
42  
43  
44  
45  
46  
47  
48  
49  
50  
51  
52  
53  
54  
55  
56  
57  
58  
59  
60

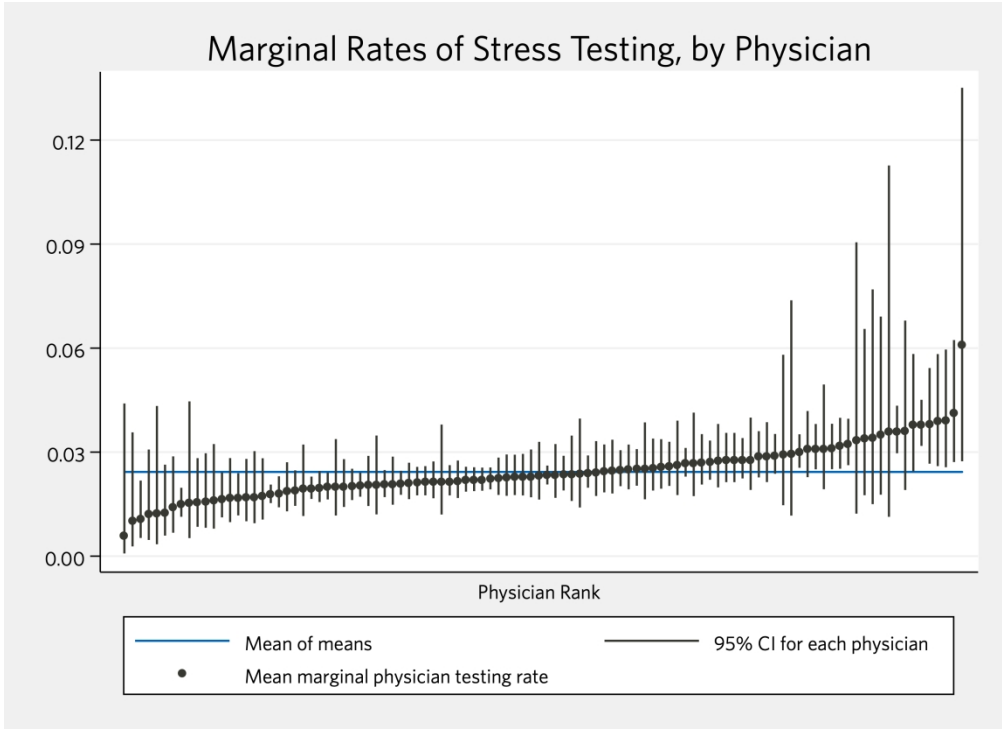

Figure 2: Mean marginal rates of preoperative stress testing, by physician  
569x413mm (144 x 144 DPI)

1  
2  
3 Supplemental Material for: Variation in preoperative stress testing by patient,  
4 physician, and surgical type  
5

6 Matthew A Pappas, MD, MPH, Daniel I Sessler, MD, Andrew D Auerbach, MD, MPH, Michael W Kattan, PhD, Alex  
7 Milinovich, BA, Eugene Blackstone, MD, and Michael B Rothberg, MD, MPH  
8  
9  
10  
11  
12  
13  
14  
15  
16  
17  
18  
19  
20  
21  
22  
23  
24  
25  
26  
27  
28  
29  
30  
31  
32  
33  
34  
35  
36  
37  
38  
39  
40  
41  
42  
43  
44  
45  
46  
47  
48  
49  
50  
51  
52  
53  
54  
55  
56  
57  
58  
59  
60

1  
2  
3  
4  
5  
6  
7  
8  
9  
10  
11  
12  
13  
14  
15  
16  
17  
18  
19  
20  
21  
22  
23  
24  
25  
26  
27  
28  
29  
30  
31  
32  
33  
34  
35  
36  
37  
38  
39  
40  
41  
42  
43  
44  
45  
46  
47  
48  
49  
50  
51  
52  
53  
54  
55  
56  
57  
58  
59  
60

|                                                                                   |    |
|-----------------------------------------------------------------------------------|----|
| 1. Regression results, clustered by physician                                     | 3  |
| 2. Physician marginal rates of stress testing                                     | 4  |
| 3. Physician rates of stress testing, unadjusted and marginal                     | 8  |
| 4. Calibration of final model                                                     | 9  |
| 5. Expected testing rates with an identical population                            | 10 |
| 6. Sensitivity analysis excluding patients planned for aortic or vascular surgery | 11 |
| 7. Marginal testing rate as a function of physician experience                    | 14 |

# 1. Regression results, clustered by physician

Results have been edited/trimmed for clarity and brevity. Interaction terms have been replaced in the table below with exponents (^2) when applicable. All dichotomous variables (those prepended with "1." in the table) use a value of 0 as the referent.

| Completed or cancelled test   | Beta Coef. | Std. Err. | t     | P> t  | [95% Conf. Interval] |           |
|-------------------------------|------------|-----------|-------|-------|----------------------|-----------|
| -----                         |            |           |       |       |                      |           |
| 1.aortic_surgery              | 2.522167   | .6078339  | 4.15  | 0.002 | 1.166378             | 3.877956  |
| 1.peripheral_vascular_surgery | 1.531945   | .1152814  | 13.29 | 0.000 | 1.285334             | 1.778556  |
| 1.urologic_surgery            | 1.5871     | .0657605  | 24.13 | 0.000 | 1.446111             | 1.728088  |
| documented_RCRI               | .2135885   | .03032    | 7.04  | 0.000 | .1506825             | .2764944  |
| 1.Gupta_greater_than_1pct     | 2.422218   | .0472362  | 51.28 | 0.000 | 2.329492             | 2.514944  |
| Estimated METs                | -.1030793  | .0128133  | -8.04 | 0.000 | -.1284818            | -.0776767 |
| functional_class              | .1444786   | .0214833  | 6.73  | 0.000 | .1020898             | .1868674  |
| ADI_national                  | -.0141123  | .0025089  | -5.62 | 0.000 | -.0190783            | -.0091463 |
| ADI_national^2                | .0001325   | .0000221  | 5.99  | 0.000 | .0000888             | .0001763  |
| BMI                           | .0120129   | .0016333  | 7.36  | 0.000 | .0088076             | .0152182  |
| DBP                           | .0037949   | .0011446  | 3.32  | 0.001 | .0015493             | .0060406  |
| 1.ischemic_heart_disease      | .5187915   | .0390133  | 13.30 | 0.000 | .4412007             | .5963823  |
| predicted_prob_of_CAD         | -.9799052  | .1105385  | -8.86 | 0.000 | -1.198045            | -.761765  |
| 1.congestive_heart_failure    | -.1196815  | .0476752  | -2.51 | 0.014 | -.2142709            | -.0250922 |
| date                          | .002128    | .0004881  | 4.36  | 0.000 | .0011708             | .0030853  |
| date^2                        | -6.15e-08  | 1.25e-08  | -4.92 | 0.000 | -8.61e-08            | -3.70e-08 |
| 1.current_smoker              | .1436825   | .0424903  | 3.38  | 0.001 | .0603125             | .2270526  |
| 1.former_smoker               | .1288456   | .0290712  | 4.43  | 0.000 | .0718283             | .1858628  |
| constant                      | -23.48573  | 4.748773  | -4.95 | 0.000 | -32.79838            | -14.17308 |
| -----                         |            |           |       |       |                      |           |
| /lnsig2u                      | -3.592461  | .2658187  |       |       | -4.113895            | -3.071026 |
| -----                         |            |           |       |       |                      |           |
| sigma_u                       | .1659232   | .0220527  |       |       | .1278436             | .2153451  |
| rho                           | .0082988   | .0021877  |       |       | .0049434             | .0138999  |
| -----                         |            |           |       |       |                      |           |

## 2. Physician marginal rates of stress testing

Due to space constraints, only selected physician marginal results are displayed in Table 3. Here we present full marginal results by physician. These are also displayed visually in Figure 2.

| Physician Rank | Marginal Rate | 95% CI        |
|----------------|---------------|---------------|
| <b>1</b>       | 0.58%         | 0.08% - 4.40% |
| <b>2</b>       | 1.00%         | 0.28% - 3.57% |
| <b>3</b>       | 1.07%         | 0.52% - 2.18% |
| <b>4</b>       | 1.20%         | 0.47% - 3.08% |
| <b>5</b>       | 1.22%         | 0.34% - 4.33% |
| <b>6</b>       | 1.25%         | 0.59% - 2.64% |
| <b>7</b>       | 1.39%         | 0.68% - 2.88% |
| <b>8</b>       | 1.50%         | 1.13% - 1.97% |
| <b>9</b>       | 1.52%         | 0.52% - 4.46% |
| <b>10</b>      | 1.55%         | 0.85% - 2.83% |
| <b>11</b>      | 1.56%         | 0.82% - 2.97% |
| <b>12</b>      | 1.60%         | 0.79% - 3.23% |
| <b>13</b>      | 1.64%         | 1.12% - 2.42% |
| <b>14</b>      | 1.67%         | 0.98% - 2.83% |
| <b>15</b>      | 1.68%         | 1.17% - 2.39% |
| <b>16</b>      | 1.68%         | 1.01% - 2.80% |
| <b>17</b>      | 1.70%         | 0.95% - 3.03% |
| <b>18</b>      | 1.73%         | 1.05% - 2.82% |
| <b>19</b>      | 1.78%         | 1.53% - 2.06% |
| <b>20</b>      | 1.80%         | 1.41% - 2.30% |
| <b>21</b>      | 1.87%         | 1.29% - 2.71% |
| <b>22</b>      | 1.89%         | 1.45% - 2.47% |
| <b>23</b>      | 1.93%         | 1.16% - 3.22% |
| <b>24</b>      | 1.95%         | 1.65% - 2.29% |



| Physician Rank | Marginal Rate | 95% CI        |
|----------------|---------------|---------------|
| <b>25</b>      | 1.96%         | 1.56% - 2.45% |
| <b>26</b>      | 1.99%         | 1.63% - 2.42% |
| <b>27</b>      | 1.99%         | 1.17% - 3.38% |
| <b>28</b>      | 1.99%         | 1.42% - 2.80% |
| <b>29</b>      | 2.02%         | 1.62% - 2.52% |
| <b>30</b>      | 2.03%         | 1.71% - 2.42% |
| <b>31</b>      | 2.04%         | 1.45% - 2.89% |
| <b>32</b>      | 2.05%         | 1.20% - 3.48% |
| <b>33</b>      | 2.06%         | 1.70% - 2.48% |
| <b>34</b>      | 2.06%         | 1.48% - 2.87% |
| <b>35</b>      | 2.09%         | 1.77% - 2.46% |
| <b>36</b>      | 2.10%         | 1.64% - 2.69% |
| <b>37</b>      | 2.12%         | 1.75% - 2.57% |
| <b>38</b>      | 2.13%         | 1.75% - 2.60% |
| <b>39</b>      | 2.13%         | 1.67% - 2.73% |
| <b>40</b>      | 2.13%         | 1.20% - 3.80% |
| <b>41</b>      | 2.14%         | 1.75% - 2.62% |
| <b>42</b>      | 2.15%         | 1.68% - 2.76% |
| <b>43</b>      | 2.19%         | 1.86% - 2.58% |
| <b>44</b>      | 2.19%         | 1.87% - 2.56% |
| <b>45</b>      | 2.20%         | 1.89% - 2.55% |
| <b>46</b>      | 2.22%         | 1.93% - 2.56% |
| <b>47</b>      | 2.24%         | 1.76% - 2.84% |
| <b>48</b>      | 2.26%         | 1.74% - 2.93% |
| <b>49</b>      | 2.27%         | 1.76% - 2.93% |
| <b>50</b>      | 2.27%         | 1.75% - 2.95% |
| <b>51</b>      | 2.29%         | 1.70% - 3.08% |

| Physician Rank | Marginal Rate | 95% CI        |
|----------------|---------------|---------------|
| <b>52</b>      | 2.32%         | 1.63% - 3.30% |
| <b>53</b>      | 2.32%         | 2.07% - 2.61% |
| <b>54</b>      | 2.33%         | 1.68% - 3.23% |
| <b>55</b>      | 2.34%         | 1.89% - 2.89% |
| <b>56</b>      | 2.35%         | 1.59% - 3.48% |
| <b>57</b>      | 2.36%         | 1.40% - 3.97% |
| <b>58</b>      | 2.39%         | 1.97% - 2.90% |
| <b>59</b>      | 2.40%         | 1.74% - 3.32% |
| <b>60</b>      | 2.43%         | 1.84% - 3.22% |
| <b>61</b>      | 2.46%         | 1.81% - 3.36% |
| <b>62</b>      | 2.48%         | 2.02% - 3.05% |
| <b>63</b>      | 2.49%         | 1.93% - 3.22% |
| <b>64</b>      | 2.50%         | 2.03% - 3.09% |
| <b>65</b>      | 2.51%         | 1.64% - 3.86% |
| <b>66</b>      | 2.53%         | 1.89% - 3.39% |
| <b>67</b>      | 2.56%         | 1.95% - 3.37% |
| <b>68</b>      | 2.58%         | 2.03% - 3.30% |
| <b>69</b>      | 2.62%         | 1.76% - 3.91% |
| <b>70</b>      | 2.68%         | 2.29% - 3.12% |
| <b>71</b>      | 2.68%         | 1.73% - 4.14% |
| <b>72</b>      | 2.70%         | 2.07% - 3.52% |
| <b>73</b>      | 2.71%         | 2.20% - 3.33% |
| <b>74</b>      | 2.75%         | 1.98% - 3.81% |
| <b>75</b>      | 2.75%         | 2.13% - 3.55% |
| <b>76</b>      | 2.75%         | 2.13% - 3.55% |
| <b>77</b>      | 2.76%         | 2.24% - 3.41% |
| <b>78</b>      | 2.76%         | 1.91% - 4.00% |

| Physician Rank | Marginal Rate | 95% CI         |
|----------------|---------------|----------------|
| <b>79</b>      | 2.86%         | 2.27% - 3.60%  |
| <b>80</b>      | 2.87%         | 2.14% - 3.86%  |
| <b>81</b>      | 2.89%         | 2.38% - 3.52%  |
| <b>82</b>      | 2.92%         | 1.47% - 5.81%  |
| <b>83</b>      | 2.94%         | 1.17% - 7.38%  |
| <b>84</b>      | 2.99%         | 2.55% - 3.51%  |
| <b>85</b>      | 3.09%         | 2.28% - 4.19%  |
| <b>86</b>      | 3.09%         | 2.50% - 3.81%  |
| <b>87</b>      | 3.09%         | 1.93% - 4.95%  |
| <b>88</b>      | 3.09%         | 2.51% - 3.82%  |
| <b>89</b>      | 3.17%         | 2.52% - 3.99%  |
| <b>90</b>      | 3.22%         | 2.62% - 3.96%  |
| <b>91</b>      | 3.33%         | 1.23% - 9.05%  |
| <b>92</b>      | 3.39%         | 1.76% - 6.55%  |
| <b>93</b>      | 3.40%         | 1.50% - 7.69%  |
| <b>94</b>      | 3.50%         | 1.77% - 6.91%  |
| <b>95</b>      | 3.57%         | 1.13% - 11.27% |
| <b>96</b>      | 3.59%         | 2.97% - 4.34%  |
| <b>97</b>      | 3.60%         | 1.91% - 6.79%  |
| <b>98</b>      | 3.77%         | 2.44% - 5.83%  |
| <b>99</b>      | 3.79%         | 3.18% - 4.51%  |
| <b>100</b>     | 3.80%         | 2.67% - 5.43%  |
| <b>101</b>     | 3.89%         | 2.60% - 5.83%  |
| <b>102</b>     | 3.91%         | 2.56% - 5.96%  |
| <b>103</b>     | 4.11%         | 2.71% - 6.23%  |
| <b>104</b>     | 6.08%         | 2.74% - 13.51% |

### 3. Physician rates of stress testing, unadjusted and marginal

Figure 1 demonstrates unadjusted rates of stress testing, and Figure 2 demonstrates marginal predictions for each physician, controlling for all other factors. Here we overlay the marginal results on the unadjusted results to demonstrate the effect of adjustment.



## 4. Calibration of final model

Based on the plot above, we suspected less-than-ideal calibration of our final model. We do not know of a universally accepted method to assess the calibration of a multilevel model on multiply-imputed data, but in most of our assessments this model fails Hosmer-Lemeshow Goodness-of-Fit testing, and the calibration plot shown here (binned into centiles) indeed suggests poor calibration. We emphasize again that our goal here is to explain variance in testing, not to guide future physicians in who should be referred for stress testing or to enable individual physician profiling.

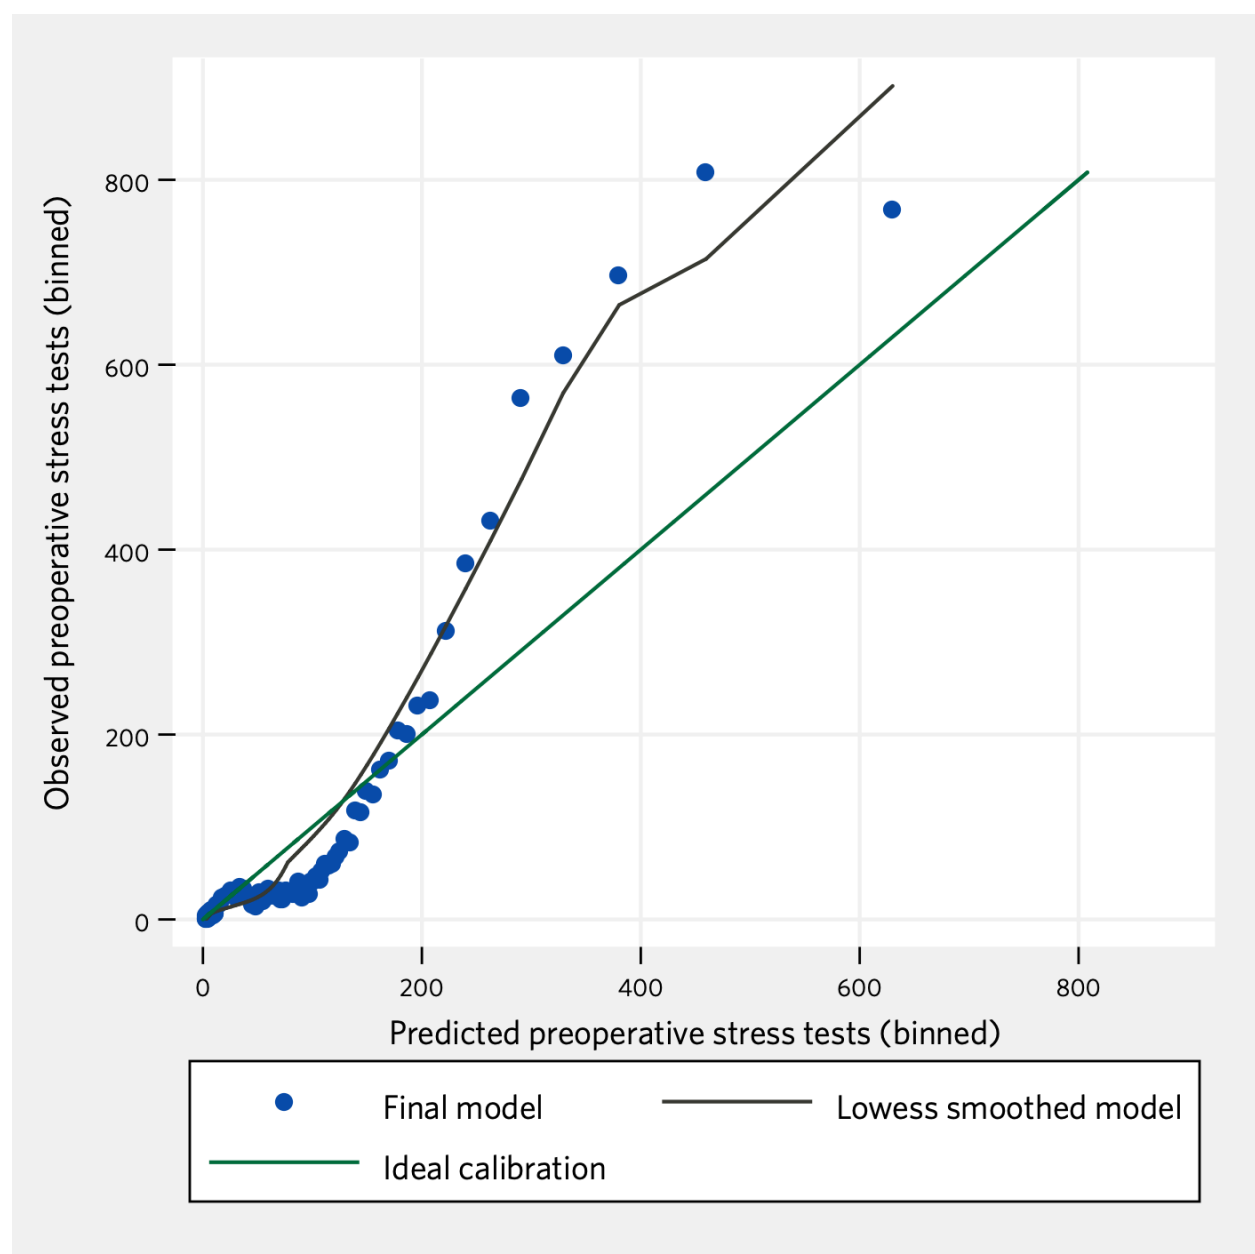

## 5. Expected testing rates with an identical population

One way to contextualize provider effects is to imagine that each provider sees an identical panel of patients and estimate the consequent differences in outcomes. Here, we sampled 1,000 patients from our original population and estimated rates of stress testing if that same cohort were seen by each physician in our dataset. The overall mean is the expected rate for this small cohort without controlling for physician ID.

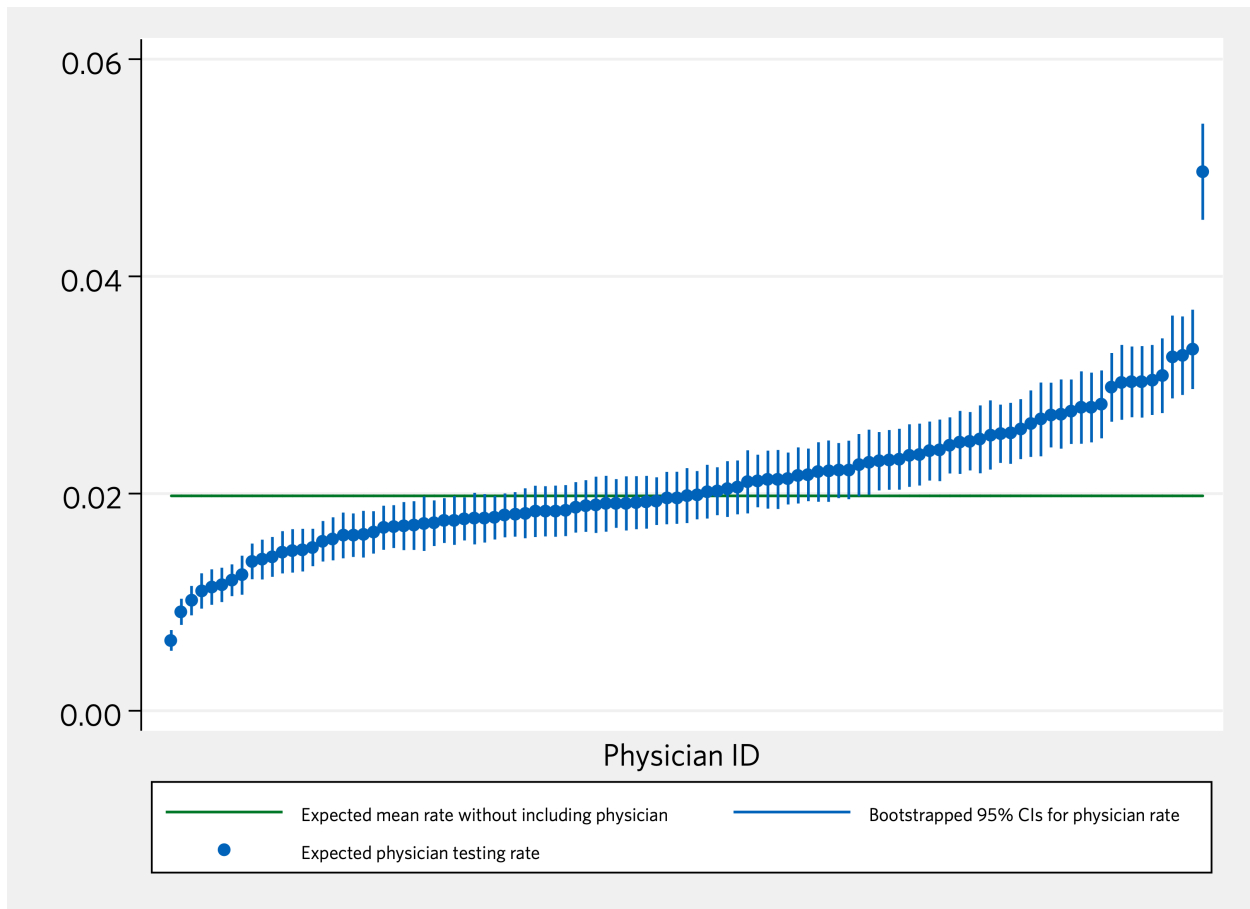

## 6. Sensitivity analysis excluding patients planned for aortic or vascular surgery

We repeated our analysis while excluding patients who were considered for aortic or vascular surgery. As in all models with dichotomous outcomes, the fixed variance leads to different effect sizes when using a different list of predictors. All effects are in the same direction as in our base-case analysis, as shown below. All changes in effect size are smaller than the smallest effect size in our base-case model (congestive heart failure). We have highlighted results where marginal rates differ from the base case by 0.02% or greater. This is an arbitrary threshold based on the intuition that a difference of less than 1 test per 500 visits is small. Due to rounding, some cells with less than a 0.2% absolute difference are displayed as differences of 0.2% in the cells below.

This analysis includes a total of 151,213 visits.

| Predictor                              | Value | Mean marginal rate, base case | 95% CI        | Mean marginal rate with aortic and vascular surgery patients excluded | 95% CI        |
|----------------------------------------|-------|-------------------------------|---------------|-----------------------------------------------------------------------|---------------|
| <b>MICA &gt; 1%</b>                    | 0     | 0.6%                          | (0.6% – 0.7%) | 0.6%                                                                  | (0.5% – 0.7%) |
|                                        | 1     | 7.1%                          | (6.7% – 7.5%) | 6.8%                                                                  | (6.4% – 7.1%) |
| <b>Documented RCRI</b>                 | 0     | 2.2%                          | (2.0% – 2.3%) | 2.1%                                                                  | (1.9% – 2.2%) |
|                                        | 1     | 2.7%                          | (2.5% – 2.9%) | 2.6%                                                                  | (2.4% – 2.8%) |
|                                        | 2     | 3.4%                          | (3.0% – 3.8%) | 3.2%                                                                  | (2.8% – 3.6%) |
|                                        | 3     | 4.2%                          | (3.5% – 5.0%) | 3.9%                                                                  | (3.3% – 4.7%) |
|                                        | 4     | 5.1%                          | (4.0% – 6.5%) | 4.9%                                                                  | (3.8% – 6.2%) |
|                                        | 5     | 6.4%                          | (4.7% – 8.6%) | 6.0%                                                                  | (4.4% – 8.2%) |
| <b>Functional class</b>                | 1     | 2.1%                          | (1.9% – 2.2%) | 2.0%                                                                  | (1.8% – 2.1%) |
|                                        | 2     | 2.4%                          | (2.2% – 2.5%) | 2.2%                                                                  | (2.1% – 2.4%) |
|                                        | 3     | 2.8%                          | (2.6% – 3.0%) | 2.6%                                                                  | (2.4% – 2.8%) |
|                                        | 4     | 3.2%                          | (2.9% – 3.5%) | 2.9%                                                                  | (2.6% – 3.3%) |
| <b>Estimated metabolic equivalents</b> | 2     | 3.3%                          | (2.9% – 3.7%) | 3.0%                                                                  | (2.7% – 3.4%) |
|                                        | 4     | 2.7%                          | (2.5% – 2.9%) | 2.5%                                                                  | (2.3% – 2.7%) |
|                                        | 8     | 1.8%                          | (1.6% – 1.9%) | 1.7%                                                                  | (1.5% – 1.9%) |
| <b>Body mass index</b>                 | 20    | 2.1%                          | (1.9% – 2.3%) | 2.0%                                                                  | (1.8% – 2.1%) |
|                                        | 30    | 2.4%                          | (2.2% – 2.5%) | 2.2%                                                                  | (2.1% – 2.4%) |
|                                        | 40    | 2.7%                          | (2.5% – 2.9%) | 2.5%                                                                  | (2.3% – 2.7%) |

| Predictor                                                    | Value               | Mean marginal rate, base case | 95% CI         | Mean marginal rate with aortic and vascular surgery patients excluded | 95% CI        |
|--------------------------------------------------------------|---------------------|-------------------------------|----------------|-----------------------------------------------------------------------|---------------|
| Diastolic blood pressure                                     | 70                  | 2.3%                          | (2.2% - 2.5%)  | 2.2%                                                                  | (2.1% - 2.4%) |
|                                                              | 90                  | 2.5%                          | (2.3% - 2.7%)  | 2.4%                                                                  | (2.2% - 2.6%) |
|                                                              | 110                 | 2.7%                          | (2.4% - 3.0%)  | 2.6%                                                                  | (2.3% - 2.9%) |
| Ischemic heart disease                                       | 0                   | 2.1%                          | (2.0% - 2.3%)  | 2.0%                                                                  | (1.9% - 2.2%) |
|                                                              | 1                   | 3.6%                          | (3.3% - 3.9%)  | 3.3%                                                                  | (3.1% - 3.7%) |
| Congestive heart failure                                     | 0                   | 2.4%                          | (2.2% - 2.5%)  | 2.3%                                                                  | (2.1% - 2.4%) |
|                                                              | 1                   | 2.1%                          | (1.9% - 2.3%)  | 2.0%                                                                  | (1.8% - 2.2%) |
| Area deprivation index                                       | 10                  | 2.8%                          | (2.5% - 3.1%)  | 2.6%                                                                  | (2.4% - 2.9%) |
|                                                              | 50                  | 2.2%                          | (2.0% - 2.3%)  | 2.1%                                                                  | (1.9% - 2.2%) |
|                                                              | 90                  | 2.6%                          | (2.4% - 2.8%)  | 2.4%                                                                  | (2.2% - 2.7%) |
| Predicted probability of obstructive coronary artery disease | 5%                  | 2.6%                          | (2.4% - 2.7%)  | 2.4%                                                                  | (2.3% - 2.6%) |
|                                                              | 10%                 | 2.4%                          | (2.3% - 2.6%)  | 2.3%                                                                  | (2.2% - 2.5%) |
|                                                              | 20%                 | 2.2%                          | (2.1% - 2.4%)  | 2.1%                                                                  | (1.9% - 2.2%) |
| Tobacco use                                                  | Current smoker      | 2.6%                          | (2.3% - 2.8%)  | 2.4%                                                                  | (2.2% - 2.7%) |
|                                                              | Former smoker       | 2.5%                          | (2.3% - 2.7%)  | 2.4%                                                                  | (2.2% - 2.6%) |
|                                                              | Neither             | 2.2%                          | (2.1% - 2.4%)  | 2.1%                                                                  | (1.9% - 2.2%) |
| Date                                                         | 2008.06.30          | 3.5%                          | (3.2% - 3.8%)  | 3.3%                                                                  | (3.0% - 3.6%) |
|                                                              | 2013.06.30          | 2.6%                          | (2.4% - 2.8%)  | 2.5%                                                                  | (2.3% - 2.7%) |
|                                                              | 2018.06.30          | 1.3%                          | (1.2% - 1.4%)  | 1.2%                                                                  | (1.1% - 1.3%) |
| Surgical category                                            | Aortic              | 23.4%                         | (6.0% - 91.1%) | -                                                                     |               |
|                                                              | Peripheral vascular | 8.7%                          | (6.7% - 11.3%) | -                                                                     |               |
|                                                              | Urologic            | 9.2%                          | (8.3% - 10.2%) | 8.8%                                                                  | (7.9% - 9.9%) |
|                                                              | Other               | 1.9%                          | (1.7% - 2.0%)  | 1.8%                                                                  | (1.7% - 2.0%) |
| Physician (summary)                                          | Lowest              | 1.0%                          | (0.1% - 4.4%)  | 0.5%                                                                  | (0.1% - 3.6%) |
|                                                              | 5th percentile      | 1.2%                          | (0.6% - 2.6%)  | 0.8%                                                                  | (0.3% - 1.8%) |
|                                                              | Median              | 2.3%                          | (2.1% - 2.6%)  | 1.6%                                                                  | (1.2% - 2.0%) |



| Predictor | Value           | Mean<br>marginal<br>rate, base<br>case | 95% CI         | Mean marginal<br>rate with aortic<br>and vascular<br>surgery patients<br>excluded | 95% CI         |
|-----------|-----------------|----------------------------------------|----------------|-----------------------------------------------------------------------------------|----------------|
|           | 95th percentile | 3.8%                                   | (3.2% – 4.5%)  | 2.7%                                                                              | (1.8% – 4.1%)  |
|           | Highest         | 6.1%                                   | (2.7% – 13.5%) | 4.5%                                                                              | (1.8% – 11.3%) |

## 7. Marginal testing rate as a function of physician experience

As with all datasets, our conclusions are a product of many decisions. For example, although we rejected physician experience as a predictor of testing rate in favor of date and a physician-specific random effect, reasonable investigators could disagree. To generate the graph below, we replaced date in our model with the number of visits each physician had completed between the beginning of our dataset and the visit in question (a proxy for preoperative clinic experience). We then computed and graphed marginal probabilities as described in our primary results.



STROBE Statement—Checklist of items that should be included in reports of *cohort studies*

|                              | Item No | Recommendation                                                                                                                                                                                                                                                                                                         | Page No                        |
|------------------------------|---------|------------------------------------------------------------------------------------------------------------------------------------------------------------------------------------------------------------------------------------------------------------------------------------------------------------------------|--------------------------------|
| <b>Title and abstract</b>    | 1       | (a) Indicate the study's design with a commonly used term in the title or the abstract<br>(b) Provide in the abstract an informative and balanced summary of what was done and what was found                                                                                                                          | 2<br>2-3                       |
| <b>Introduction</b>          |         |                                                                                                                                                                                                                                                                                                                        |                                |
| Background/rationale         | 2       | Explain the scientific background and rationale for the investigation being reported                                                                                                                                                                                                                                   | 4                              |
| Objectives                   | 3       | State specific objectives, including any prespecified hypotheses                                                                                                                                                                                                                                                       | 4                              |
| <b>Methods</b>               |         |                                                                                                                                                                                                                                                                                                                        |                                |
| Study design                 | 4       | Present key elements of study design early in the paper                                                                                                                                                                                                                                                                | 5                              |
| Setting                      | 5       | Describe the setting, locations, and relevant dates, including periods of recruitment, exposure, follow-up, and data collection                                                                                                                                                                                        | 4-5                            |
| Participants                 | 6       | (a) Give the eligibility criteria, and the sources and methods of selection of participants. Describe methods of follow-up<br>(b) For matched studies, give matching criteria and number of exposed and unexposed                                                                                                      | 4-5<br>N/A                     |
| Variables                    | 7       | Clearly define all outcomes, exposures, predictors, potential confounders, and effect modifiers. Give diagnostic criteria, if applicable                                                                                                                                                                               | 5                              |
| Data sources/<br>measurement | 8*      | For each variable of interest, give sources of data and details of methods of assessment (measurement). Describe comparability of assessment methods if there is more than one group                                                                                                                                   | 5-8                            |
| Bias                         | 9       | Describe any efforts to address potential sources of bias                                                                                                                                                                                                                                                              | 9-10                           |
| Study size                   | 10      | Explain how the study size was arrived at                                                                                                                                                                                                                                                                              | 5                              |
| Quantitative variables       | 11      | Explain how quantitative variables were handled in the analyses. If applicable, describe which groupings were chosen and why                                                                                                                                                                                           | 5-10                           |
| Statistical methods          | 12      | (a) Describe all statistical methods, including those used to control for confounding<br>(b) Describe any methods used to examine subgroups and interactions<br>(c) Explain how missing data were addressed<br>(d) If applicable, explain how loss to follow-up was addressed<br>(e) Describe any sensitivity analyses | 8-10<br>5-10<br>9-10<br>5<br>5 |
| <b>Results</b>               |         |                                                                                                                                                                                                                                                                                                                        |                                |
| Participants                 | 13*     | (a) Report numbers of individuals at each stage of study—eg numbers potentially eligible, examined for eligibility, confirmed eligible, included in the study, completing follow-up, and analysed<br>(b) Give reasons for non-participation at each stage<br>(c) Consider use of a flow diagram                        | 5,10<br>17                     |
| Descriptive data             | 14*     | (a) Give characteristics of study participants (eg demographic, clinical, social) and information on exposures and potential confounders<br>(b) Indicate number of participants with missing data for each variable of interest<br>(c) Summarise follow-up time (eg, average and total amount)                         | 26-27<br>26<br>5               |
| Outcome data                 | 15*     | Report numbers of outcome events or summary measures over time                                                                                                                                                                                                                                                         | 10                             |

|    |                          |    |                                                                                                                                                                                                              |               |
|----|--------------------------|----|--------------------------------------------------------------------------------------------------------------------------------------------------------------------------------------------------------------|---------------|
| 1  | Main results             | 16 | (a) Give unadjusted estimates and, if applicable, confounder-adjusted estimates and their precision (eg, 95% confidence interval). Make clear which confounders were adjusted for and why they were included | 10-11, 26, 28 |
| 2  |                          |    | (b) Report category boundaries when continuous variables were categorized                                                                                                                                    | 26            |
| 3  |                          |    | (c) If relevant, consider translating estimates of relative risk into absolute risk for a meaningful time period                                                                                             | 28            |
| 4  |                          |    |                                                                                                                                                                                                              |               |
| 5  | Other analyses           | 17 | Report other analyses done—eg analyses of subgroups and interactions, and sensitivity analyses                                                                                                               | 11-12         |
| 6  |                          |    |                                                                                                                                                                                                              |               |
| 7  | <b>Discussion</b>        |    |                                                                                                                                                                                                              |               |
| 8  | Key results              | 18 | Summarise key results with reference to study objectives                                                                                                                                                     | 12-15         |
| 9  | Limitations              | 19 | Discuss limitations of the study, taking into account sources of potential bias or imprecision. Discuss both direction and magnitude of any potential bias                                                   | 16-18         |
| 10 | Interpretation           | 20 | Give a cautious overall interpretation of results considering objectives, limitations, multiplicity of analyses, results from similar studies, and other relevant evidence                                   | 18            |
| 11 | Generalisability         | 21 | Discuss the generalisability (external validity) of the study results                                                                                                                                        | 17            |
| 12 | <b>Other information</b> |    |                                                                                                                                                                                                              |               |
| 13 | Funding                  | 22 | Give the source of funding and the role of the funders for the present study and, if applicable, for the original study on which the present article is based                                                | 1,19          |
| 14 |                          |    |                                                                                                                                                                                                              |               |

\*Give information separately for exposed and unexposed groups.

**Note:** An Explanation and Elaboration article discusses each checklist item and gives methodological background and published examples of transparent reporting. The STROBE checklist is best used in conjunction with this article (freely available on the Web sites of PLoS Medicine at <http://www.plosmedicine.org/>, Annals of Internal Medicine at <http://www.annals.org/>, and Epidemiology at <http://www.epidem.com/>). Information on the STROBE Initiative is available at <http://www.strobe-statement.org>.
